# Supplementary material for: Dimension-agnostic and granularity-based spatially variable gene identification
Source: Research Square preprint supplement (doi:10.21203/rs.3.rs-2687726/v1), 2023-03-22
Supplement: Supplementary file 1 [file 52d380f825c053e3051d25be.xlsx]

## Sheet: Contents
Supplementary Tables
Supplementary Table Number	Legend
1	Comparision of the computational time and memory on an Ubuntu 16.04.4 LTS workstation with Intel(R) Xeon(R) W-2125 CPU @ 4.00GHz and 32 GB memory
2	BSP results on ST Mouse Olfactory Bulb study
3	BSP results on ST human breast cancer study
4	BSP results on hippocampus study using SeqFISH
5	BSP results on hypothalamus preoptic regions study using MERFISH
6	BSP results on Acute Kidney Injury (AKI) study using 10X Visium
7	GO enrichment analysis on Acute Kidney Injury (AKI) study using 10X Visium
8	Reactome analysis on Acute Kidney Injury (AKI) study using 10X Visium
9	Disease Ontology analysis on Acute Kidney Injury (AKI) study using 10X visium
10	BSP Computational resource analysis
11	PanglaoDB results on Slide-seq V1 mouse cerebellum study
12	PanglaoDB results on Slide-seq V2 mouse cerebellum study
13	PanglaoDB results on HDST olfactory bulb study
14	Methods comparision on Slide-seq V2 mouse cerebellum study
15	GO enrichment analysis on identified SVGs in Slide-seq V2 mouse cerebellum study
16	724 genes detected both by 2D and 3D data using BSP on patient RA1
17	532 genes detected only by 3D but failed by 2D meta-analysis using BSP on patient RA1
18	80 genes detected only by 2D meta-analysis but failed by 3D using BSP on patient RA1
19	Gene ontology enrichment analysis on 1,257 genes identified by 3D settings in patient RA1
20	Gene ontology enrichment analysis on 724 genes identified by both 2D meta-analysis and 3D settings in patient RA1
21	Gene ontology enrichment analysis on 532 genes identified only by 3D settings in patient RA1

## Sheet: Supplementary Table 1
Supplementary Table 1: Comparision of the computational time and memory on an Ubuntu 16.04.4 LTS workstation with Intel(R) Xeon(R) W-2125 CPU @ 4.00GHz and 32 GB memory
		Computational Time (Seconds)				Memory Cost (MB)
#Cells	#Genes	BSP	spatialDE	spark	sparkx	BSP	spatialDE	spark	sparkx
2000	2000	2.0207	123.225	2495.02	4.1326	313	586	437	143
2000	4000	3.6867	177	5078.88	8.62881	538	682	761	175
2000	6000	5.3282	178.506	7809.12	12.9925	767	779	1090	208
2000	8000	7.1296	268.236	10890.4	17.2706	996	879	1420	242
2000	10000	8.8816	397.962	16746.5	21.5941	1263	995	1810	281
2000	12000	9.642	348.402	14118.5	25.5695	1381	1040	1980	297
2000	14000	11.2958	483.186	19166	30.2381	1681	1170	2420	341
2000	16000	12.9158	539.694	27574.9	35.3006	1973	1300	2840	384
2000	18000	14.643	655.8	29967.1	39.7456	2230	1390	3150	415
2000	20000	16.0921	595.032	NA	43.8932	2412	1470	NA	442
#Genes	#Cells	BSP	spatialDE	spark	sparkx	BSP	spatialDE	spark	sparkx
10000	1000	4.983	229.626	3932.2	18.3127	678	743	976	197
10000	2000	8.8883	337.452	12908	21.4453	1216	974	1750	274
10000	3000	11.3337	525.426	33574.1	24.1035	1768	1210	2540	353
10000	4000	16.3685	865.596	60676.6	27.2224	2333	1450	3340	434
10000	5000	21.2506	1178.25	93894.1	27.6055	2873	1690	4120	511
10000	6000	27.7718	1651.33	140343	32.3576	3434	1930	4920	591
10000	7000	32.8588	2122.4	NA	35.0192	3955	2150	NA	666
10000	8000	39.3781	NA	NA	38.0817	4536	NA	NA	749
10000	9000	47.0233	NA	NA	41.3105	5165	NA	NA	839
10000	10000	53.5948	NA	NA	43.5625	5678	NA	NA	913
Note: NA means the program has not finished the task in 48 hours

## Sheet: Supplementary Table2
Supplementary Table 2: BSP results on ST Mouse Olfactory Bulb study
GeneName	p_values
Nrf1	0.938874
Zbtb5	0.938874
Ccnl1	0.612117
Lrrfip1	0.789601
Bbs1	0.938874
Lix1	0.00181273
Whrn	0.938874
Ate1	0.564485
Ubac1	0.418342
Rab34	0.938874
Nap1l1	2.65223e-08
Srgap3	0.0188458
Slc1a3	0
Polr3k	0.938874
Inpp5f	0.0173881
Ndufaf6	0.938874
Atp5j2	0.00499461
Tnpo2	0.510056
2010300C02Rik	6.80906e-08
B3gat3	0.174126
Commd5	0.938874
Ints3	0.69364
Rbm6	0.938133
Rnpepl1	0.938874
Sox2	0.146431
Cbx5	0.292315
Poldip3	0.422803
Mapre1	0.341854
Luc7l3	0.0102349
Pi4kb	0.938874
Mink1	0.286517
Resp18	0.938874
Rnf10	0.184494
Eef1a1	0
Mdfic	0.938874
Rhbdf1	0.938874
Zbtb14	0.938874
Sh3gl2	0
Fam213a	0.106826
Dbn1	0.00160593
Cldn5	0.073912
Fam193b	0.778306
Grik5	1.0054e-05
Pip5k1a	0.938874
Sh3bgrl	0.00455212
Cwc25	0.938874
Camkk1	0.342461
Chn2	0.0375407
Dhh	0.938874
Map3k11	0.938874
Zmynd11	0.0014567
Snx13	0.411153
Ptbp3	0.842103
Secisbp2l	0.158944
Fyco1	0.676087
Cox5b	5.3112e-07
Rnf181	0.736748
Cyfip2	0.000178488
Sptssa	0.860675
Pmepa1	0.12742
Pde4dip	0.0258158
Rhbdd3	0.938874
Oxct1	6.08306e-15
Huwe1	0.0139391
Tcaim	0.938874
Med13	0.10205
Nlk	0.222782
Atm	0.938874
Sptan1	2.76629e-13
Zcchc11	0.769312
Etv3	0.938874
Tspan2	0.128005
Fam160a2	0.55532
Zfyve20	0.866821
Ctr9	0.931284
Cers5	0.714403
Scly	0.938874
Fndc4	0.646042
Kif1b	0.000917055
Polr2l	0.410013
Vcpip1	0.938874
Pcp4	0
Gnb2	3.08148e-07
Rapgef3	0.938874
Sema3c	0.00254036
Tipin	0.938874
Atp6v0d1	0.000107468
Gpr137b	0.938874
2310010J17Rik	0.938874
Slc3a2	0.396851
Rbmx	0.228629
Ube2a	0.513763
Man1b1	0.933251
Ndel1	0.263668
Cdk5	0.639788
Arf4	0.0320568
Lrfn4	0.92683
Dnajc4	0.938874
Usp33	0.250815
Tmem203	0.938874
Mcfd2	0.378176
Epha10	0.923168
Slc9a3r2	0.448739
Ahi1	0.000130463
Ap3b2	0.378231
Tbx15	0.938874
Aacs	0.938874
Trim11	0.938874
Snrnp70	0.00921523
Dock1	0.873965
Eif4ebp2	0.938874
Trpv2	0.938874
Higd1a	0.0796881
Ngrn	0.803224
Hspa1a	0.938874
2023-09-08	0.938874
Psme2	0.938874
Rps15a	0.0293164
Utrn	0.778306
Lsm3	0.938874
Wbp1l	0.938874
Gm10012	4.25561e-12
Fstl5	0.432215
Pgap1	0.161072
Pam	0.410013
Arpc1a	0.392466
Trmt11	0.938874
Gtf2h4	0.938874
Mageh1	0.312926
Cdk14	6.01751e-10
Zmiz1	0.142757
Ndufc1	0.0205759
Ttyh2	0.938874
Tpk1	0.938874
Hnrpll	0.742637
Pde12	0.938874
Cops8	0.35546
Arhgap5	0.127868
Hey1	0.807691
Cox14	0.0495574
Pak6	0.664711
B230217C12Rik	0.938874
2410004B18Rik	0.739008
1600012H06Rik	0.938874
Pdap1	0.0936707
Gpatch2l	0.938874
Rasgrp3	0.938874
Hnrnpul2	0.00153094
Adamts15	0.938874
Apc	0
Rab33b	0.938874
Btbd3	2.52978e-11
B4galt5	0.682927
Slc2a1	0.276733
Rd3	0.938874
Coq6	0.938874
Vdac1	1.54349e-12
Plec	0.938874
Gclm	0.938874
Tuba1a	0
Brd4	0.385674
Pyroxd2	0.938874
Itsn1	0.0451569
Ctsb	5.76223e-10
Srcin1	0.754889
Tspan31	0.933701
Paics	0.938874
Mark1	0.594897
Aip	0.925351
Nudt3	0.00420103
Ccnh	0.187416
Ube2ql1	0
Auts2	0.743837
Cd99l2	0.938874
Tcerg1	0.259971
Fzr1	0.938874
Chmp5	0.0558564
Mfsd2a	0.938874
Naca	0.335515
Tada1	0.545148
Slu7	0.938874
Tbp	0.938874
Phc3	0.92525
Slc38a6	0.938874
Csnk1g3	0.0126022
2023-03-05	0.0660291
Gm13889	4.87756e-12
Htr3a	0.938874
Shisa3	0.0339409
Rab18	0.00324767
Pld1	0.938874
Zfp91	0.251587
Plcl1	0.938874
Bgn	0.653662
Col9a1	0.938874
Neto2	0.336395
Ppp3cc	0.437111
Mat2b	0.119669
Tgfbr2	0.938874
Daam1	0.938874
Rps4x	3.52112e-05
Anapc4	0.938874
Eprs	0.195688
Pcsk6	0.938874
Ptprd	0.00229301
Psmb10	0.938874
Fancc	0.938874
Acbd5	0.550591
1200011I18Rik	0.938874
Syt4	0.093839
Rbm42	0.720006
Pygb	0.160171
Eomes	0.269334
Aldh7a1	0.877833
Mypop	0.858753
Aco2	1.15344e-07
Nr2f1	0.478559
Cdk17	8.94806e-06
Steap2	0.622064
Car10	0.733296
Lamtor1	0.462788
Vps26a	0.849548
Sertad4	0.488815
Atg9a	0.737857
Rpl10a	0.00803554
B3galtl	0.907424
Cand2	0.938874
Tmx3	0.525389
Ank2	4.00185e-10
Cul1	0.0836177
Syt13	0.879066
Tiam2	1.16064e-05
Frmd3	0.885102
Clk4	0.263668
Dopey2	0.938874
Gpr37l1	0.0370732
Adnp	0.124677
Cdca7l	0.938874
Rwdd4a	0.938874
Cuedc2	0.115714
Kptn	0.938874
Hspe1	0.018655
Pitrm1	0.938874
Dlx6as1	0.00308853
Arhgap32	0.628031
Scrib	0.854333
Arap2	0.119776
Pcdhb7	0.938874
Cox4i1	0
Cnn3	0.181965
Ryr3	0.938874
Ppp1r36	0.938874
Xrcc6bp1	0.938874
Ccdc85a	0.818808
Dhps	0.938874
Cd24a	0.543835
Wdr1	0.00819966
Copa	0.0678637
Slitrk5	0.133711
Map2k2	0.641888
Itgb1	0.796458
Pikfyve	0.866821
Txndc15	0.262519
Myt1l	1.80576e-05
Vat1l	0.893576
Shprh	0.866821
Arhgdig	0.743794
BC002163	0.000291103
Acsl4	0.515993
Rgs12	0.0306927
Man2b1	0.938874
Pex13	0.938874
Prune2	0.00215075
Rmnd5b	0.938874
Rad9a	0.938874
Lmnb2	0.938874
Sfrp1	0.938874
Gemin5	0.938874
Laptm4a	0.000780944
Phka2	0.938874
Slc39a1	0.747958
Birc2	0.938874
Srebf2	0.938874
Atp6ap1	0.0452416
Atp6v0b	1.65178e-11
Pkig	0.0207544
BC030336	0.650442
Eif3i	0.203408
Ubr4	0.422542
Phf1	0.938874
D8Ertd738e	0.0509391
Foxg1	0.000550906
Ptprs	8.16211e-07
Ints2	0.938874
Rps23	0.000172343
Wipf2	0.938874
Psmd7	0.501587
Yipf4	0.352625
Tenm3	0.000290493
Sez6	0
Ssbp4	0.673317
Polr1c	0.785498
Nup88	0.938874
Lrrc8a	0.908838
Matk	0.891395
Aftph	0.25447
Ercc6	0.938874
Tril	0.732125
1810014B01Rik	0.938874
Flnb	0.938874
Ndrg3	8.03786e-05
Cpne6	4.58722e-14
Rin2	0.938874
Rtn4	0
Zhx1	0.827779
Lims2	0.938874
Siah1a	0.938874
Necab3	0.330164
Ppp2r2b	0.0883751
Csnk1e	0.167549
Nat14	0.59261
Scarf2	0.938874
Maged1	0.0124462
Cacng3	0.622064
Chmp1a	0.837107
Maea	0.673173
Abhd4	0.578978
Rps14	0.00221163
Tmem63b	0.879066
Camk2g	0.00125598
Gaa	0.00117906
Wdr36	0.938874
Adss	0.59989
Ms4a6c	0.938874
Kirrel3	0.808236
Rock1	0.609053
Ctsz	0.938874
Srp54b	0.156201
Clasp2	0.000307068
Gpbp1	0.252723
Rpp30	0.938874
Gpatch4	0.938874
Kcnip2	0.0221812
Prkcb	1.598e-09
Nisch	5.94251e-09
Fmr1	0.00843933
Slc48a1	0.411153
Gna11	0.0774165
Fam76a	0.403884
Sox12	0.938874
Ndufa11	0.0115559
Spock3	0.000993271
Insm1	0.938874
Neurl4	0.530701
Lsg1	0.938874
Tcf4	3.60801e-10
Hist1h4d	0.938874
Lyn	0.938874
Rps12	0.879066
Papola	0.0479004
Tagln3	0.250521
Atp1a2	0.00582942
Setd1b	0.788217
Cdc42se2	0.000172999
Ildr2	0.000197714
Cldn12	0.696147
Zc4h2	0.938874
Dhodh	0.938874
Smarce1	0.359237
S100b	0.0136719
Dctn2	0.000801955
Sdhaf1	0.938874
Myef2	0.43522
Cpsf3	0.938874
Maf1	0.0811194
Diap1	0.93888
Yme1l1	0.124172
Usp24	0.842103
Nckipsd	0.938874
Mterfd1	0.895484
Gpr17	0.923647
Zfp740	0.897027
Tbc1d9b	0.737131
Arl2bp	0.0585235
Rxrb	0.873575
Pop7	0.917659
Cnot7	0.105587
Ccsap	0.170418
Hnrnpa2b1	0
Rbfox3	5.80379e-08
Xpr1	0.00377126
Kcnd3	0.0945809
Mrpl33	0.548531
Ddx19a	0.885102
Rcc2	0.855557
Psmb4	0.114693
Ddx50	0.70522
D5Ertd579e	0.506143
Rnf138	0.938874
Igsf11	0.591835
Emd	0.769312
Stx12	0.0133913
Ntan1	0.854108
Gng13	0.0136128
Mrpl13	0.765116
Emc2	0.484571
Cct8	0.0473172
Tmem127	0.557962
Phyhd1	0.938874
Tmed7	0.00476003
Prkaca	0.0430548
Stx6	0.723234
Macrod2	0.938874
Gramd4	0.938874
Rbbp6	0.0569781
Aasdhppt	0.938874
Bpgm	0.82469
Ndufb10	0.0203379
Lrpap1	0.172328
Banp	0.916555
Ncrna00085	0.938874
Jmjd6	0.938874
Jmy	0.769977
Gng4	0
Clk2	0.938874
Phactr1	0.434968
Eno2	0
Mir703	0
Sh3glb2	0.000433235
Grm2	0.654924
Akr1e1	0.938874
Wwp2	0.938874
Selk	0.0293164
Rps2	0.826122
Scara3	0.938874
Hspd1	0.0781307
Ptov1	0.000168275
Trim59	0.938874
Fam101b	0.938874
Ankhd1	0.853154
Mrpl22	0.938874
Api5	0.767875
A230065H16Rik	0.723853
Dgat2	0.938874
Klhdc3	0.0984291
Mlf2	1.20235e-13
Rpl31	0.267571
Sucla2	0.00120904
Ncapd2	0.938874
Gpr158	0.517022
Rabgap1	0.608576
Bap1	0.240242
Atxn10	2.47758e-05
Cadm2	0
Tsn	0.255611
Zfp654	0.938874
Agap3	0.155383
Sumo3	0.053221
Mtfp1	0.0619509
Minpp1	0.580079
Eif3a	0.0440746
Romo1	0.309788
Ube2g2	0.365111
Lmna	0.867473
C030023E24Rik	0.938874
Mtpn	1.73958e-06
Ambra1	0.938874
Hbegf	0.938874
Tmem191c	0.91944
Fam5c	0.938874
Uggt1	0.818694
Btbd7	0.938874
Uvrag	0.938874
Yars2	0.938874
4930503E24Rik	0.938874
Cyb5	0.888826
Rpl4	0
Srrm3	0.69778
Bcl10	0.938874
Gm1673	0.164004
Sft2d2	0.938874
Ssbp2	0.0143767
Dnm1	0
Tmem200c	0.938874
Cacna1i	0.195526
Ndufc2	7.36671e-07
Tubgcp3	0.935983
Homer1	0.0431844
0610009O20Rik	0.938874
Rnf34	0.833215
Nrsn2	0.395287
C330021F23Rik	5.80222e-06
Tsr2	0.773982
Reln	1.54824e-05
Snhg5	0.938874
Ccser2	0.554096
Smyd2	0.557962
Nbl1	0.686129
Srpk2	0.0266789
Ppa1	0.162749
Slc35a5	0.938874
Gm6710	0.938874
Osbpl6	0.938874
Ak1	0.0731064
Mrpl1	0.938874
Zbtb9	0.938874
Upf2	0.808483
Megf8	0.795289
Hdac5	0.00134007
Vmp1	0.0856822
Zkscan3	0.767875
Lrrc73	0.896903
Ncald	0.0999177
Insig2	0.166406
Arid4b	0.637924
Farsa	0.908474
Hnrnpf	0.426622
Ptp4a2	0.00026675
Dnajc30	0.938874
Dusp26	0.803224
Hspbp1	0.767826
Tubg1	0.938874
Ccdc117	0.938874
Ccdc47	0.105802
Ptdss2	0.894639
Mbd1	0.938874
Lca5l	0.938874
Spag7	0.938874
Cyp51	0.923168
Anp32b	0.773982
Fam98b	0.0642783
Adam19	0.938874
Spry2	0.938874
Ccdc58	0.938874
Vipas39	0.871476
Dnm3	0.0834587
Cd36	0.938874
Hpca	0.808236
Dhx30	0.578375
Gkap1	0.938874
Cdv3	0.162015
Golgb1	0.664345
Srsf2	0.00467494
Cspg5	2.90734e-09
Atf2	0.246847
Psmb2	0.751905
Pafah1b1	0
Rad21	0.114069
A730098P11Rik	4.93523e-09
Acadm	0.938874
Ftsjd1	0.938874
Dync2h1	0.938874
Wdfy1	0.938874
Mapk8ip1	0.036121
Ssr1	0.0322502
Dak	0.938874
Ogdh	0.155984
St7l	0.938874
Stam2	0.938874
Cryab	0.508184
Zfyve28	0.938874
Dtna	0.914581
Srprb	0.875593
Fam126a	0.1504
Lrig2	0.938874
Psat1	0.310646
Tbc1d8	0.938874
Zdhhc14	0.782824
Nkrf	0.796458
Tuba8	0.938874
Noa1	0.938874
Tnfrsf21	0.873575
Gbp7	0.938874
Ltn1	0.673317
Med28	0.781441
Kpna6	0.402626
Epb4.1l4a	0.938874
Stip1	0.0250423
Abcb10	0.938874
Chadl	0.938874
Brsk2	0.938874
Polr2g	0.449294
Lrp12	0.811968
Nrcam	6.18154e-05
Gnb5	8.07265e-07
Elovl5	0.0431631
Slc30a9	0.0443206
Dzip1	0.938874
Snapc2	0.938874
Lin7b	0.938874
Itm2a	0.149717
Cbr3	0.938874
Whsc1	0.157772
Map4	8.43094e-07
2610507B11Rik	0.0237696
Ier5	0.0399272
Snx18	0.712462
Arpc2	0.000247747
Pcdhb11	0.938874
Eif4g1	0.0306019
Ago2	0.938874
Parp6	0.0847697
Il17d	0.938847
Camk4	0.0109082
B4galnt1	0.938874
Larp6	0.938874
Taf1	0.938874
Ddost	0.938874
Hsp90ab1	0
Ddx5	0
Ndufv3	0.234661
Casp2	0.938874
Prmt1	0.260779
Kcnv1	0.938874
Sec61g	0.938874
Bmyc	0.48722
Prdx3	0.361273
Gid4	0.319661
Rrp9	0.938874
Zfand3	0.382544
Bcan	0.00199115
Supt6	0.534766
Wbp11	0.0770826
Ppil4	0.629943
Cnp	9.10701e-06
Chd6	0.250521
Uqcrc1	0.000134102
Zfp644	0.321136
Baalc	1.63245e-05
Fam107b	0.938874
Slc39a7	0.938874
Pabpn1	0.038997
Atl2	0.559734
Lrrc7	0.938874
Cgrrf1	0.938874
St8sia5	0.938874
Evi5	0.339581
Pcyt1b	0.866821
Tfcp2l1	0.938874
Otud7b	0.938874
Lsm4	0.243813
Psmd10	0.938874
Tbrg4	0.938874
Ptpn23	0.920789
Jmjd8	0.938874
Ptpmt1	0.938874
Dnajc28	0.938874
Rpf2	0.938874
Ret	0.938874
Gtf2f1	0.729215
Gdi1	5.11867e-14
Mycbp	0.938874
Eid2	0.542383
Apoo	0.600702
Cdc5l	0.641888
Wdr35	0.938874
Skp1a	1.78609e-14
Sfxn5	0.041713
Aggf1	0.746813
Rab10	0.0426564
Polr1d	0.615022
Lpgat1	0.00220246
Ipcef1	0.938874
Rab3gap2	0.796007
Cyhr1	0.091797
Lrp10	0.938874
Penk	0
Cacna1a	0.159649
Atxn2l	0.437937
Lemd3	0.867126
Osbpl9	0.783128
Mgat1	0.933701
Ankrd34a	0.938473
Lnp	0.679074
Zfp287	0.938874
Tmtc4	0.938874
Gspt1	0.0390211
Tspan17	0.938874
Mrpl42	0.704468
Flna	0.938874
Sfpq	4.13937e-08
Grcc10	3.83772e-06
Tmbim4	0.787987
Wdr13	0.0856822
Tceb2	5.78788e-08
Gart	0.938874
Akap12	0.938874
Riok3	0.731247
Atp11c	0.938874
Acap2	0.245592
Kat6b	0.0690982
Impact	0.335062
Atp6v1c1	0.000262525
Bend6	0.938874
Rsl1d1	0.259189
Timm44	0.674667
Rspo3	0.867473
Pskh1	0.938874
Timm10	0.580331
Frzb	0.00048296
Rapgefl1	0.714721
Cxcl14	0.261349
Synj2bp	0.714721
Srgap2	0.938874
Ccdc30	0.938874
Cep97	0.938874
Tnpo3	0.680672
B3gat2	0.938874
2900097C17Rik	0
Ccnl2	0.12782
Gabpa	0.860983
Hspa5	4.58722e-14
Svip	0.645649
Itm2c	0
Cic	0.00337764
Dnajc8	0.115558
Atxn2	0.42155
Susd3	0.938874
Luc7l2	0.000356071
Pi4ka	0.00110677
Exoc7	0.894639
Rnf11	0.193726
Lrba	0.186631
Eef1a2	0
Trim9	0
Asic1	0.938874
Strn3	0.338888
Zfp804a	0.933251
Cited2	6.09091e-06
6330403K07Rik	0
Cbln4	0.912892
Nt5m	0.938874
Mpped2	0.738984
Map1a	1.20095e-14
Ap3d1	0.0214194
Klhl9	0.00380309
Lace1	0.938874
Trpc3	0.938874
Eef2	0
Chn1	0.124087
Tmem40	0.938874
Mll5	0.795936
Zfp354c	0.592199
Hapln1	0.878591
Vegfa	0.938874
2410006H16Rik	0.938874
Snx12	0.923301
Ptbp2	0.0124164
Bckdhb	0.938874
C1qbp	0.191742
Tmem33	0.0877402
Nfasc	0.240468
Ints1	0.770668
Arntl	0.938874
AI593442	0.77728
Ciapin1	0.938874
Pithd1	0.560136
Mtor	0.0293476
Tmem97	0.938874
Chchd7	0.938874
Efnb3	0.664711
Bloc1s1	0.545452
Pcna	0.58195
Cflar	0.938874
Fam120a	0.230951
Ndufa12	6.22528e-05
Zcchc2	0.938874
Ndufa8	0.0018536
Mcts1	0.548986
Bicd2	0.769312
Bcl11b	0.0107305
Aspn	0.938874
Slc24a2	0.820037
Cul9	0.938874
Qdpr	0.000159211
Itga3	0.938874
Kcnh3	3.01671e-05
Naa60	0.0689237
Prps1l3	0.938874
4921524J17Rik	0.938874
Tmem151a	0.245861
Scrg1	0.938874
Rapgef1	0.417607
Tspan3	0
Nrbp1	0.555793
Spop	0.0092599
Cers2	0.938874
Tspyl4	1.78609e-14
Calu	0.92485
Lyrm2	0.938874
Kcna2	0.0329209
Slmap	0.146359
Luzp2	3.6006e-08
Smg5	0.71231
Sod2	0.0235347
Acads	0.938874
Slc35b1	0.938874
Iqcb1	0.938874
Smarcd3	0.397378
Pcdhb19	0.938874
Etv6	0.938874
Mmadhc	0.479198
Phldb1	0.0446581
Ip6k2	0.320199
Sema6d	0.584546
Dynlt3	0.361353
Arxes2	0.0705771
Actn4	0.938874
Mtrf1	0.938874
Klhl12	0.938874
Ywhaz	3.58367e-12
Mycl1	0.938874
Ywhae	0
Tmem178	0.938874
BC018507	0.754889
Mapk14	0.446596
Golga4	0.304511
Zfml	0.221546
Mlh3	0.938874
Prkaa2	0.938874
Cltc	0
1500009C09Rik	0.567706
D430019H16Rik	0.0720856
Cdkn2aipnl	0.938874
Hmgcr	0.051059
Fam49a	0.355783
Ubr3	2.90479e-05
Ifit3	0.938874
Kcnh2	0.557962
Jak1	0.120581
Camsap1	0.288305
Npy1r	0.938874
Rpe	0.938874
Dcdc2a	0.938874
Cmpk1	0.0644561
Atp5e	6.71403e-05
Ppp1r15b	0.929598
Gtf2b	0.720006
Abr	6.18078e-14
Scgb1c1	0.938874
Zmym3	0.393686
Zfp330	0.938874
Zbtb41	0.938847
Pnpla2	0.938874
Wrnip1	0.282564
Zfand5	1.77552e-09
Ing4	0.838765
Car7	0.938874
Gpx4	0.00507101
Gtf3c2	0.938874
Ep300	0.252371
Ndnf	0.271196
Fnbp1l	0.0170219
Rybp	0.883757
Mgea5	0.000128798
Comt	0.938874
Fmnl1	0.938874
Scn3a	0.119791
Rfk	0.40718
Myof	0.938874
Fam216a	0.128668
Dpp10	0.000103342
Eif2ak4	0.938874
Erc2	0.676735
Rps18	0.499354
B4galt4	0.938874
Ranbp6	0.854195
Kif13a	0.938874
Zfp14	0.938874
Gstm5	0.187101
Micu1	0.480214
Serp2	0.570987
Cox10	0.938874
Abi2	2.30249e-05
Rufy1	0.938874
Mecp2	0.170735
Sf3b3	0.18578
Det1	0.941168
Pcbd1	0.938874
Unc5d	0.938874
Nudt4	0.0158536
Asphd2	0.938874
Ndst2	0.938874
Ccni	0.00131366
Dab1	0.141219
Tomm5	0.36482
Ccdc101	0.938874
Kif21b	0.800046
Sgcb	0.717683
Cacna2d1	0.233572
Hid1	0.933251
Map1lc3b	1.1683e-06
Col4a6	0.938874
Fbxw7	0.000865019
Slc38a1	8.95393e-05
Snapin	0.938874
1110004E09Rik	0.938874
Nono	0.000105641
Ier3ip1	0.503234
Pcbp2	0.938874
Cmip	0.0012062
Nudc	0.114566
Spcs1	0.0605933
Rrbp1	0.880526
1810055G02Rik	0.938874
Asxl1	0.879598
Mknk1	0.938874
H13	0.894197
Mta1	0.737361
Tnks1bp1	0.938874
Fam78b	0.938874
Phax	0.785498
Fabp7	0
Smpd1	0.254869
Hadhb	0.25447
Anapc7	0.938874
Mkks	0.642483
Bms1	0.938874
AI413582	0.938874
Bace1	0.374022
Sart1	0.938874
Ablim1	0.0217225
Kcnk13	0.938874
Wsb1	0.375483
Slc25a46	0.203547
Tcn2	0.938874
Sema6a	0.938874
Ube4b	0.769312
Son	9.55224e-05
Lrrc61	0.938874
Fam210a	0.228473
Arhgef12	0.00143508
Btbd10	0.880526
Slc25a26	0.938874
Ipmk	0.938874
Dvl2	0.938874
Stk30	0.938874
Sdhc	0.18907
Tomm40l	0.897528
Ubac2	0.938874
Ptpn6	0.938874
Dohh	0.806482
Zmat5	0.938874
Champ1	0.753366
Naa30	0.759402
Ranbp1	0.575088
Isca1	0.014856
Ivns1abp	0.00818875
Pcmtd2	0.00159957
Tmx2	0.361273
Ank3	6.77696e-08
Col4a1	0.938874
Exoc3	0.688974
Gpt2	0.128427
Eri3	0.299433
Camk2b	0
Smc1a	0.866489
Wif1	0.938874
Mbtps1	0.785793
Rpa1	0.938874
Tubb2a	0
3110043O21Rik	0.938874
Zcchc18	4.39548e-06
Ube2w	0.203352
Flot2	0.938874
Ramp2	0.938874
Bcr	0.938874
Vapb	0.44223
Zfp598	0.799667
Srsf11	0.000162977
Hagh	0.0814252
Ilf3	0.384202
Tpt1	0
Vcp	3.58367e-12
Siae	0.938874
Nalcn	0.295237
Ola1	0.0101316
Efhd2	1.26707e-06
Cntnap2	0.0856822
Mob4	0.15621
Usp46	0.324564
Capns1	0.774385
Gm2382	0.938874
Smad7	0.882047
2900052N01Rik	0.938874
Nefh	0.686766
Fbxo34	0.938874
Babam1	0.705348
Map2k1	0
Zfp207	0.000599505
Slc7a5	0.938874
2810029C07Rik	0.938874
Ehd1	0.938874
Arfgef1	0.0133115
4833420G17Rik	0.791034
Ghitm	0
Rnf20	0.690029
Crlf3	0.938874
Adra2a	0.938874
Snrpc	0.587731
Akap8	0.346247
Apba1	0.475229
Canx	7.94576e-12
Fus	0.263668
Inpp1	0.938874
Rpl36	0.611093
Dld	0.00274234
Pls3	0.418908
Baiap2	1.79234e-11
Eif2s3x	0.608311
Ppp1r11	0.738028
Ddx31	0.938874
Zc3h10	0.938874
Hook3	0.485297
Chic1	0.938874
2023-09-03	0.0462243
Fam63b	0.486962
Tmem132b	0.706664
Mapk1	0
Prrc2c	0.0359892
Sptbn1	0
Gsn	0.0335591
Stmn1	0
Ndufb3	0.0326808
Agpat1	0.938874
1200014J11Rik	0.938874
Ciao1	0.914728
Reep3	0.873575
Stk32c	0.680672
Taldo1	0.378854
Nfia	0.323614
Trio	0.0185691
Pias2	0.283731
Samd14	0.83699
Rpl17	0.143682
Ndrg4	0
Snrnp48	0.938874
Bdp1	0.734828
Psmc1	0.575919
Polr2j	0.692726
Yes1	0.938874
P4ha2	0.938874
Ndufs6	0.221546
Elp3	0.671999
Nfyc	0.640247
Foxo1	0.890664
Snrpg	0.8145
Pcbp1	8.34448e-06
Tmem255a	0.0868702
Mfsd10	0.938874
Fn1	0.194633
Ddr2	0.938874
Cab39l	0.938874
H2afy	0.00608287
Cotl1	0.75102
Abhd5	0.938874
Fbxo41	0.938874
Papd5	0.602709
Clcn3	0.00123199
2810405F15Rik	0.938874
Rap1gds1	0
Nfe2l2	0.938874
Gda	0
Ly6c1	0.181232
Fjx1	0.462069
Sod1	2.15932e-06
Mtfr1l	0.362299
Jmjd1c	0.451927
Cwc15	0.121392
Cs	0.0572065
Notch3	0.938874
Hmcn1	0.938874
Enho	0.612324
Kcnip1	0.0426855
Zrsr1	0.938874
Gabrb2	1.52374e-05
Msi2	0.00212713
Csk	0.386485
Tbx6	0.938874
Pdpn	0.938874
Ncor1	0.0572625
Usmg5	0.783128
Hdac1	0.938874
Pdcd6	0.338781
Sidt2	0.866821
Fam168a	0.0931824
Hdlbp	0.218256
Kars	0.785498
Ncoa4	0.291999
Zfp503	0.938874
Eml5	0.0144766
Neurl1a	0.820037
Pacsin3	0.938874
Rps11	0.017149
Pcnx	0.499354
Eif5b	0.657892
Bai1	0.019003
Drg1	0.938874
Jun	0.402529
Arfip1	0.938874
Ctcf	0.0949351
Igsf21	0.938874
E130309F12Rik	0.938874
Qk	0
Il18	0.938874
Tusc2	0.241093
Parl	0.938874
Igtp	0.938874
Atp2c1	0.063512
Limd2	0.000156763
Pabpc1	0.0203379
Sdhaf2	0.938874
Khdrbs1	2.9148e-13
Rac1	0
Pitpnm2	0.0718155
Ebf4	0.938874
Sacm1l	0.243093
Srsf5	1.89133e-11
Lmtk3	0.162057
Rbm39	6.04642e-10
Stk38	0.938874
Srek1ip1	0.938874
Chsy3	0.938874
Mllt4	0.611093
Ankrd29	0.0227111
Usp14	0.382353
Nefm	0.414927
Gatad1	0.517085
Rbfox2	5.53486e-06
Slc41a1	0.938874
6330549D23Rik	0.938874
Slc6a11	0
Ehmt1	0.938874
Kcnd2	6.86645e-13
Mrpl30	0.223908
Kank1	0.938874
Atg13	0.46541
Adam23	0.635539
Rnf139	0.714721
Actl6b	0.132111
Ap2m1	7.79569e-12
Taf13	0.871472
Cxxc1	0.837793
Tmtc1	0.5266
Ube2n	0.00180048
A230046K03Rik	0.87537
Mrpl14	0.879216
Emc1	0.807691
Pcmt1	0.591835
Zfp106	0.180083
Cox6a1	0
Fndc3a	0.41071
Ifnar2	0.938874
Apopt1	0.938874
Pcnxl3	0.938874
Usp37	0.938874
Clec2l	0.626189
Dctn3	0.0108158
Celf3	0.00256738
Sfswap	0.818808
Dpp9	0.938874
Strbp	3.35514e-06
Edil3	0.128682
Ercc8	0.938874
Psma1	0.0245306
Prex1	0.0992884
Clk3	0.938874
Pigk	0.938874
Bscl2	0.902835
Tcf12	0.529721
Phlpp1	0.757559
Naa40	0.938874
Irs1	0.663923
Kcnj10	2.90479e-05
Zic1	0.363762
Dusp8	0.0520512
Gm13826	1.01092e-06
Pbxip1	0.938874
Plekhn1	0.938874
Diras1	0.938874
Ugt8a	0.768542
Scd2	0
Fra10ac1	0.938874
Slmo2	0.733283
Morn4	0.938874
Gpr155	0.879066
Zranb2	2.03997e-05
Nceh1	0.310538
Zc3h18	0.938874
Surf1	0.938874
Rfxap	0.938874
Hpcal4	0
Fech	0.766852
2310022B05Rik	0.196421
G3bp1	0.194412
Tbc1d16	0.731247
Mapk9	0.0146285
Cops7a	0.391597
Nell2	0.938874
C87436	0.938874
Ube2g1	0.421176
Mprip	1.40617e-05
G2e3	0.938874
Zmym1	0.883911
Dnajc7	0.147193
Cse1l	0.140665
Tle3	0.564485
Kpna4	0.0666401
Ccnd1	0.141219
Tpra1	0.938874
Agap2	0
Sdf2	0.874827
1810026B05Rik	0.569583
Apod	0
Iqck	0.938874
Mrps22	0.938874
Scg3	0.195857
Aldoart2	0.938874
Srrm2	0
Tor1aip1	0.938874
St3gal5	0.907756
Snhg3	0.938874
Fat1	0.275489
Klhl24	0.679069
Uba5	0.695195
Grlf1	0.479198
Pcgf2	0.938874
Rheb	6.45404e-09
Tex9	0.938874
Foxk2	0.63684
C1qc	0.938874
Rad51d	0.938874
Ostc	0.630732
Kat5	0.936501
Slain2	0.838007
Lactb	0.938874
Gpr162	0.25754
Rasa3	0.00117939
Picalm	0.169714
Ociad1	9.54823e-11
Ptpdc1	0.873575
Ppp1r7	0.938874
Numa1	0.910466
Glb1	0.938874
Fgf9	0.938874
Phtf2	0.938874
Scrt2	0.938874
Bid	0.938874
Ctss	0.671763
Serf2	0.0563888
Cox7a2l	0.00744011
Ube2q1	0.195574
Ube2f	0.938874
Vps26b	0.0306312
Txndc5	0.938874
Gpr85	0.938874
Grina	1.91102e-05
Pdpk1	0.0158536
9230110C19Rik	0.938874
Fam50a	0.938874
Unc119	0.938874
Rpl7l1	0.938874
Spred3	0.938874
Lurap1l	0.938874
Rps19	0.295237
Lrrtm3	0.800793
BC016423	0.938874
Psmc5	0.938874
Tmem39a	0.938874
Tm7sf3	0.938874
Kbtbd7	0.592714
2023-09-04	0.119776
Fyttd1	0.0424587
Mylk	0.938874
Abca1	0.582846
Ppp2cb	0.247039
Coq2	0.323914
Map2k4	0.366348
2300009A05Rik	0.874557
Pcdh9	0.445275
Map3k2	0.938874
Spry1	0.938874
Actn1	0.749858
D2hgdh	0.938874
Mb21d2	0.938874
Ppm1g	0.757496
Rgs8	0.938874
Samhd1	0.938874
Tmppe	0.938874
Gdpd1	0.584088
Tmem135	0.746813
Fnbp1	0.891737
Morf4l1	0
Fam155a	0.376245
Snph	0.0178605
Psmb1	0.0137697
Trf	0.0228722
Slc6a1	0
Gnaq	0.0817779
Ppap2b	7.36403e-08
Plvap	0.938874
Fgf14	0.938874
Mapk8ip2	0.799888
2700089E24Rik	0.249539
Lyz2	0.938874
Ppp2r5b	0.681757
Lonrf3	0.920517
Agrn	0.357018
Abcc9	0.938874
Zcchc9	0.938874
Acyp1	0.938874
Fam126b	0.129116
Scap	0.55242
Rai1	0.833215
Cxx1c	7.75122e-07
Gabarapl1	0
Mapt	0.000426375
Sh3kbp1	0.938874
Mrp63	0.938874
Zdhhc17	0.169531
Ptpn2	0.796007
Gorasp2	0.276733
Snrnp200	0.141219
Nid1	0.938874
Arrb1	0.140665
4922501C03Rik	0.938874
H2afy2	0.817256
Plxna3	0.938874
Apeh	0.938874
6720401G13Rik	0.913706
1810037I17Rik	0.904113
Git1	0.113975
Polr2f	0.716726
Sema7a	0.612354
Gnb4	0.938874
Dazap1	0.521826
Tra2b	0.000147664
Ralgps2	0.0599144
Xbp1	0.136635
Trappc1	0.759347
Slc35a2	0.938874
Cand1	0.0373085
Tulp4	0.306467
Cbr2	0.938874
Opn3	0.938874
Casp8ap2	0.938874
Klf16	0.612117
D10Jhu81e	0.791307
Gad2	0
Ppid	0.724412
Topors	0.938874
Efemp2	0.938874
Zc3h11a	0.113241
Paqr4	0.938874
Rcan2	0.0110084
Etv1	0.0833234
Rpgr	0.837793
Adipor1	0.386485
Ahnak	0.28728
Ddah1	0.0512405
Tmem206	0.659994
Ddx6	0.000413082
S100a5	0
Rps9	1.78899e-09
Th	0.12534
Golga7	0.216263
Rragd	0
E030024N20Rik	1.61432e-10
Ppfia1	0.294571
Tpi1	7.19224e-10
Prdx2	4.59938e-07
Dnalc4	0.453958
Ywhab	0
Tnrc6b	0.417584
Arhgap33	0.176577
Alkbh6	0.920789
Chd9	0.72722
Mpp6	0.938874
Fam20c	0.0272405
Smim15	0.938847
Atl1	0.294988
AI848285	1.63245e-05
Sec62	0.00184978
Arhgap42	0.938874
Bcap31	0.672519
A030009H04Rik	0.0146124
Ctnnbl1	0.938874
Eif4b	0.0148639
Ift27	0.938874
Nfic	0.894197
Ergic3	0.780173
Fzd9	0.938874
Bcl7b	0.796458
P4htm	0.862872
Dnajc27	0.120632
Pgp	0.938874
Lrrn3	0.0720856
Bri3bp	0.0162217
Mt2	0.00044367
Zbtb18	0.768542
A430005L14Rik	0.938874
Brpf1	0.938874
Atp5l	1.30426e-07
Mvb12b	0.600153
Capzb	0.336395
Ccdc137	0.938874
Fam73a	0.803224
Sec11a	0.938874
Map7d2	0.034104
Prkrir	0.938874
Zfp385b	0.0655557
Jdp2	0.891097
2810468N07Rik	0.938874
Adck5	0.938874
Syndig1	0.938874
Dync1i2	0.230254
Cplx1	0
Slc18a2	0.938874
Prpf3	0.938874
Nampt	0.497646
Atp6v1f	0.00883295
Zyx	0.14183
Rpia	0.938874
Gbas	0.00832132
Ctdspl	0.925658
Nxf1	0.688702
Noc3l	0.938874
Slc19a2	0.938874
Ptk2b	0.125989
Fam19a5	0.129883
Cd63	0.819327
Tceb1	0.608311
Kcna1	0.528208
9030612E09Rik	0.938874
Rbbp5	0.938874
Sall1	0.00876717
Smarca1	0.938874
Stxbp5	0.488933
Ide	0.725563
Zmat2	0.344697
Pdxk	0.0401633
Zfp930	0.938874
Trmt2a	0.877697
Ctsl	0.0306019
Gar1	0.938874
Arhgap1	0.550591
Fam229b	0.938874
Fam69b	0.548986
Nup155	0.938874
Nap1l3	0.791283
Bet1	0.938874
Abhd16a	0.688702
Cc2d2a	0.938874
Tnk2	0.475314
Msrb1	0.938874
Nbea	0.0292649
Ddit4	0.219964
Rgs7bp	0.938874
B3gat1	0.893792
Pccb	0.938874
Gpm6b	0
Chmp4b	3.51862e-06
Cbx3	0.016444
Hspa4	0.000283042
Grk6	0.64637
Rgcc	0.148645
Mapre3	3.48131e-06
Setd3	0.193024
Hivep1	0.476128
Trim8	0.221494
Rab3b	7.52404e-06
Trappc6b	0.430872
Rmdn1	0.938874
Rnf41	0.73878
Bcas2	0.565702
Tmem55a	0.0865637
Msrb2	0.938874
Arl13b	0.938874
Atg7	0.938874
Zfp653	0.938874
Thsd7a	0.43522
Lamtor4	0.701475
Adcy6	0.938874
Gpd1	0.938874
Map1b	0
Lrtm2	0.303996
Nabp2	0.842755
Ankrd45	0.407312
Ncl	0.000711317
Rpp14	0.938874
Med30	0.938874
Ncln	0.898969
Wdr8	0.938874
Acbd3	0.891977
Synpo	0.365939
Rpl7	0.0059818
Gm15421	0.0192066
Cdkn1b	0.389821
Ggt7	0.549011
Snx11	0.938874
Marf1	0.595801
Ptbp1	0.938874
Sdcbp	0.360479
Yars	0.0736498
Hcn2	0.745534
Mocs2	0.59989
Dolpp1	0.938874
Chl1	0.938874
2410015M20Rik	0.38566
Lrrc55	0.641888
Snx3	0.00251229
Yap1	0.938874
Tenc1	0.938874
Ubtd2	0.938874
Leng8	0.938874
Chchd4	0.652092
Cmc2	0.938874
Ndufa13	0.000118536
4930481A15Rik	0.896903
Znrf3	0.938874
Ndufa9	0.14325
Mpv17l2	0.938874
Mcts2	0.938874
Trnp1	0.00092495
Nckap1l	0.938874
Slc24a3	0.938874
Tbc1d1	0.938874
Snx27	0.12663
Trrap	0.358831
Med15	0.891097
Id2	1.08689e-05
Pum2	7.22507e-07
Msh2	0.938874
Ciz1	0.938874
Rapgef2	0.0123853
Actr10	0.133569
Etf1	0.323614
Fam53c	0.744948
AW549877	0.644705
1110008J03Rik	0.938874
Agtpbp1	0.0228722
Bex2	0
Tmem68	0.555793
Atp11b	0.938874
Rnf220	0.00592249
Tjp2	0.938874
Cr1l	0.938874
Ncan	0.503234
Jakmip1	0.938874
Ttyh3	1.49838e-06
Ttl	0.938874
Gnas	0
Sema3e	0.598368
Camkk2	0.000320383
Stat5b	0.386485
Prickle1	0.306467
Alg14	0.938874
Rap1b	0.179664
Clip2	0.757559
Ahcyl2	0.0014311
Egln1	0.357018
Ip6k1	0.00517052
Gpsm1	0
Bcl2l2	0.938874
Arl5a	0.405583
Dixdc1	0.240303
Nucb1	0.938874
Dclk1	0
Wasf1	1.38375e-07
Hp1bp3	0.00144374
Mtx2	0.508724
Fam21	0.241434
Papss1	0.901622
Nova1	0.672248
Gnb2l1	1.92627e-05
Rbm12	0.938874
Rasa1	0.000106017
Dynll2	2.19149e-06
Map3k1	0.631294
Trappc10	0.698908
2310035C23Rik	0.503841
Prkaa1	0.938874
Cltb	0.173447
Rprd1a	0.723814
Dgcr2	0.221494
Fnbp4	0.800793
Rad54l2	0.938874
Rangrf	0.938874
Ddx3x	5.78967e-05
Ptms	5.32412e-11
Dtd1	0.639788
Eif1	0
Ifit2	0.938874
Tmcc2	0.200952
Cd3eap	0.938874
Sms	0.565362
Esam	0.938874
Zfp692	0.938874
Trappc11	0.373453
Atrx	0.00044912
Dip2c	0.0592542
Afap1	0.938874
Ensa	0.00121591
Pacs2	0.44748
Nradd	0.938874
Ahcyl1	2.72883e-06
Atp5d	0
Pmvk	0.938874
Arglu1	8.43094e-07
Fam57b	0.155383
2023-09-15	0.0363599
Slc35d3	0.938874
Tmem59	0.00036533
Timm23	0.542383
Snx32	0.873095
Psd3	0
Ncoa6	0.564485
Uhrf1bp1l	0.371435
Ube2e2	0.466414
Fbxo28	0.361334
Tm2d2	0.149717
Mlc1	6.56986e-06
Gtf3c1	0.169549
Rnaseh2c	0.938874
Wtap	0.424512
Nin	0.777162
Ppp2r2d	0.336395
C030034I22Rik	0.938874
Ccdc124	0.938874
Heph	0.938874
Cd164	0.590185
Mtmr14	0.938874
Rnf149	0.498277
Phlda3	0.938874
Cnih2	0.000917055
Aqr	0.933701
Lgalsl	0.120581
Myl12b	0.000732083
Mest	0.26762
Zfp523	0.709851
Cntn1	2.71735e-11
BC003331	0.938874
Pfdn1	0.636889
Ctsd	0.00566788
Sf3b2	5.53267e-06
Mxd4	0.938874
Rdh10	0.938874
Ppp1r9b	1.4996e-05
Usp47	0.38681
Pbx1	0
Phf21a	0.938874
Fbxw2	0.768043
Ube2d2a	0.00885374
Cdk5r1	9.40482e-12
Hap1	7.87747e-05
Mctp1	0.322518
Rexo1	0.914728
Kcnk1	0.273585
Nsmf	0.00946456
Pcbp3	6.18078e-14
Tom1l2	0.039571
Marcks	0
Spcs2	0.175022
Reps2	0.938874
Rab12	0.0424587
Nanos3	0.938874
Phf12	0.808236
Adora2b	0.938874
Pik3c2b	0.938874
Glrx	0.580331
Degs1	0.808236
Pgam1	0
Skil	0.604655
Pld3	0.0218621
Spin1	0.0200583
Fgfr3	0.336395
Pnkd	0.895041
Zswim6	0.514966
Slc36a1	0.938874
Cadm3	0.00440623
Arxes1	0.504777
Mrpl34	0.791416
Soga2	0.938874
Wsb2	0.179564
Trp53inp2	0.302037
Syt6	0.0174093
Snd1	0.882319
Sun1	0.466414
Ttc14	0.232794
Gjd2	0.938874
Mgll	0.257804
Trmt1	0.938874
Lamtor3	0.454053
Sdhb	0.00645752
Sumo2	7.18481e-05
Azi2	0.758456
Tmem256	0.505267
Adk	0.161948
E430025E21Rik	0.938874
Eif3b	0.189209
Cdh4	0.780911
Dos	0.0222839
Cacna1c	0.539368
Fgf13	0.0426564
Cd81	0
Spred1	0.0134898
H1fx	0.766681
Bcl11a	0.0260067
Mdga1	0.918891
Tsc22d2	0.862247
Fbxw11	0.0258482
Emc8	0.818808
Fam104a	0.757559
Casc4	0.938874
Rbm10	0.738028
Ptpn12	0.521826
Ist1	0.19471
Per3	0.938874
Vapa	8.82767e-12
Spata2	0.908474
Ilf2	0.761763
Cnih4	0.938874
Fam3c	0.504795
Rps25	0.173167
Txn2	0.0203379
Zfp326	0.73878
2900026A02Rik	0.938874
0610009B22Rik	0.938874
Camk1d	0.119918
Slc25a39	0.673317
Max	0.460811
Shkbp1	0.938874
Nup93	0.938874
Gins4	0.938874
Fau	0.00302002
Hcfc1	0.720693
App	0
Trove2	0.663253
Iglon5	0.938874
Hnrnpa3	1.83666e-13
Txndc17	0.938874
Slc7a2	0.938874
Selm	1.07602e-08
Caml	0.789512
Rgs10	0.938874
Kif2a	2.3175e-05
Ndufb6	0.0306312
Mras	0.814849
Atp13a3	0.67335
Atp6v0e2	0.000290493
Pgm2	0.90162
Akap9	0.410761
Rsu1	0.938874
Tceal6	0.0702332
Rpl37	0.0395076
Ndn	0.000485373
Apbb1	0.000331158
Sin3a	0.938874
Mkrn1	0.070818
Il17ra	0.938874
Zc3h13	0.770668
Xrcc1	0.938874
2023-09-02	0.495934
Ust	0.938874
Map3k4	0.938874
Slc38a2	2.0232e-05
Dusp28	0.938874
9430016H08Rik	0.938874
Mapk6	0.813166
Metap2	0.142757
Pip4k2a	0.332028
Snf8	0.889822
Dennd6a	0.938874
Ndufb8	1.11302e-05
Rbm25	0.150508
Atp1b1	0
Dnajc3	0.859526
Tmco1	0.609053
Rasgef1c	0.938874
Psmb5	0.00263142
Gjb6	0.41339
Tardbp	0.00790148
Reep2	0.262519
Zeb2	4.05055e-12
Mtdh	0.938874
Psmd1	0.676087
Nipa1	0.938874
Yipf6	0.938874
Sv2a	0.349137
Mgme1	0.938874
Shisa2	0.938874
Btbd17	0.938874
Otud5	0.938874
Pnmal2	2.92699e-14
Ncaph2	0.65371
Snx6	0.808236
Ank	0.203352
Rpl10	0.0454231
Epb4.1l2	0.808236
Cpne4	0
Sympk	0.938874
Fahd2a	0.938874
Abhd17a	0.0306019
1700123O20Rik	0.938874
Grpel1	0.548968
Gabra3	0.643093
Zcchc12	0.938874
Rabepk	0.938874
Ctxn1	2.65068e-08
Pola1	0.938874
H2afz	1.02593e-06
Cenpc1	0.938874
Tmem179	0.384933
Ppp2r3c	0.938874
Clcn2	0.938874
Camk2a	7.34684e-08
Eif2s2	0.362307
Kif5a	7.64392e-09
Rpl39	0.000829584
Smyd4	0.938874
Sipa1l1	6.18078e-14
Suds3	0.140208
Ttf1	0.938874
Hspa4l	0.607854
Kdm5a	0.938874
Nfe2l1	0.233228
Ubqln1	0.00733606
Myh10	0.251681
Nr2f6	0.938874
Dhrs1	0.758456
Avl9	0.402529
Gjc2	0.938874
Cox20	0.466396
Dmtf1	0.893634
Cyp4f15	0.938874
Use1	0.622648
Pdp1	0.090883
Gabrb3	8.51628e-13
Rtca	0.505908
Vipr2	0.306395
Sepp1	0
2210018M11Rik	0.938874
Sf3b5	0.738564
Ccdc177	0.938874
Zdhhc20	0.938874
Pdcd7	0.938874
Vps51	0.938874
Sulf2	0.938874
Stag1	0.820037
Aamp	0.0257838
Xpo6	0.896903
Plekhb2	0.0273563
Zfp148	0.219684
Slc25a17	0.878305
Gm5148	0
Cyfip1	0.406024
Pacsin2	0.000260369
Rps10	0.221494
Rrp12	0.938874
Alyref	0.871476
Tvp23b	0.771558
Zfp629	0.938874
Clint1	0.420497
Xpot	0.607395
Zfp608	0.744891
Htr1f	0.938874
Fam220a	0.938874
Chst1	0.0764221
Mier1	0.938874
Arfip2	0.838007
Syn1	0
Bcat1	0.248988
Wdr26	0.111858
Gpc1	0.724412
Rpl7a	0.0141515
Fam69a	0.938874
Dlgap3	0.00162409
Cldn10	0.597468
Klhl7	0.184739
Wdr7	0.073505
Metrn	0.612324
Ppp1r16a	0.938874
Cadps	9.95289e-10
Tsc22d1	2.29749e-05
Eif2b1	0.938874
Tmem147	0.734828
Vps53	0.850389
Galnt7	0.938874
Sp1	0.938874
Fbxo9	0.134419
l7Rn6	0.743598
Myo6	0.467914
Vta1	0.608311
Cdan1	0.938874
Sgk1	0.930895
Atf4	0.0149381
Psmb8	0.938874
Slc13a4	0.791307
Rgs20	0.938874
Yaf2	0.158274
Mga	0.730042
Serinc1	0
Nsfl1c	0.408677
Pop5	0.933251
Ccdc12	0.783128
2700060E02Rik	0.129735
Rbfox1	5.76409e-13
Sez6l2	0.0408703
Pcnp	0.051748
Atf7ip	0.938874
Ndufa6	4.39548e-06
Sybu	0.00155143
Sec24c	0.357018
A330023F24Rik	0.502248
Adam22	0.171366
Got1	0.0281777
Bag6	0.221494
Ptges3	0.00112779
Taf12	0.938874
Lrrc16b	0.891097
Gpt	0.938874
Vtn	0.0026373
Ankib1	0.548986
Mrpl15	0.797289
Farp1	0.37592
Rala	0.148123
Tmem121	0.938874
Vps4b	0.701475
Itfg1	2.45197e-06
Ss18	0.87537
Herc6	0.938874
3230401D17Rik	0.938874
Ptgfrn	0.938874
Rbbp4	0.00759153
Tmem242	0.938874
Trappc8	0.871113
Senp7	0.847331
Acot13	0.44223
Mdk	0.891097
Pdia6	0.0414226
Celf2	0
Camsap2	0.1896
Map2	0
Cdh2	0.488933
Rnf152	0.938874
Ube2b	1.06969e-08
C330007P06Rik	0.622064
Arpc3	0.132111
Cyc1	3.69517e-07
Psma6	0.0883977
Gng2	0.938874
Rbm7	0.398746
Btg1	0.00139333
Phactr3	0.0140811
Mgst1	0.651551
Pdcl	0.70956
Ung	0.938874
Ppme1	0.504887
Dido1	0.883381
Tmem161a	0.906109
Taf7	0.938874
Gja1	0.000170265
Aard	0.938874
Ift57	0.829454
Gm6548	0.154314
Nipal3	0.938874
Rbm18	0.402626
Lmcd1	0.938874
Vmn2r29	0.938874
Lmo1	0.938874
Chka	0.534766
Aifm1	0.938874
Hist1h1c	0.456012
Gstp2	0.420908
Atp5c1	2.75292e-05
Elmod2	0.938874
Mettl14	0.938874
Hmgcl	0.873636
Zzz3	0.938874
Chtf8	0.938874
Ly6a	0.789512
Psme1	0.938874
D17Wsu92e	0.101904
Gfap	0.237324
Eif3c	0.461638
Eif4e	0.0143762
Dnajb6	0.000698962
Tmem64	0.789512
Spsb4	0.938874
Crem	0.938874
Tle2	0.938874
Atp5k	0.0707806
Kctd17	0.0561039
Lhfpl2	0.938874
4933431E20Rik	0.938874
Apoe	0
Fat4	0.938874
Rock2	0.598143
[truncated: 10,604 more rows]

## Sheet: Supplmentary Table 3
Supplementary Table 3: BSP results on ST human breast cancer study
GeneName	p_values
USP4	0.931626
MAPKAPK2	0.00416624
LANCL2	0.931626
MCL1	0
TMEM109	0.507419
TMEM189	0.931626
ITPK1	0.749781
UBXN11	0.931626
SCARB1	0.792059
USP28	0.931626
NUDT21	0.931626
LDHB	0
SEC62	0.199078
SRF	0.931626
EEF1G	0.931626
COX6C	0
ESRP1	1.9504e-06
RPL39	8.15775e-05
MFF	0.931626
AATF	0.108846
ICMT	0.931626
NENF	0.000138128
COL6A3	0
RPS5	0
C4B	0
C12orf57	0.00597748
TUBB	1.62753e-07
H3F3A	0
CAB39L	0.931626
KRT7	2.09009e-14
RPL21	4.96533e-12
GPX1	1.07149e-07
TMEM176A	0.931626
ZNF146	0.603667
AP1G1	0.0392484
PLK2	0.00489751
ASCC3	0.656757
PDZK1IP1	0.931626
CD63	0
TCEB2	0.0743503
RPL34	0
NBR1	0.299751
CDC37	0.0378254
SLC35F5	0.692643
SUSD6	0.931626
WIZ	0.931626
YAF2	0.931626
TMEM43	0.931626
APOA1BP	0.842447
CLCN7	0.201656
OAZ1	0
WEE1	0.854756
SUB1	1.51566e-07
ACTN4	0
HIPK1	0.826195
CCT4	0.000138871
CCNY	0.651734
H2AFJ	0
LTBP2	0.348162
RPL13	0
PSME4	0.427434
ARPC3	0.000562462
BANF1	0.931626
CAST	0.00893125
UQCR11	0
MYL9	4.35517e-15
FUS	0.0304666
IFI6	0
POLD4	0.931626
OPA1	0.931626
SNX9	0.288875
FAH	0.931626
SLC39A10	0.931626
TRAPPC13	0.931626
DUSP10	0.931626
HSP90AB1	0
MBD2	0.0162769
CCDC115	0.931626
TXNIP	2.04704e-05
ANXA9	0.931626
DPP3	0.786808
MTF2	0.931626
TMBIM6	0
CTSO	0.931626
ADD1	0.839835
TMEM63B	0.931626
IGFBP7	0
H1FX	5.52435e-09
ALDH1B1	0.931626
TXNDC17	0.00199727
MMS19	0.931626
CFDP1	0.931626
TAF7	0.48971
PARK7	0.0158984
HMOX2	0.931626
FAM104B	0.931626
MTRNR2L8	0
PAF1	0.18576
C16orf72	0.231998
CD276	0.340459
MMP2	5.40209e-13
YPEL5	0.688766
GNE	0.931626
NBEAL2	0.744151
PSMG2	0.874363
GOLPH3	0.164702
PABPC1	0
CCSER2	0.931626
ACTG1	0
ANKRD46	0.931626
KIAA1217	0.128113
ATP5G2	2.63257e-07
LRP11	0.744081
FXYD3	0
POLG	0.931626
ARL6IP5	0.000243967
H2AFY	0.000753949
FASN	0
RPS29	0
MRPL21	0.873821
GRTP1	0.931626
GFOD2	0.931626
ADSSL1	0.931626
LGALS1	5.77923e-10
REL	0.931626
CPSF2	0.931626
DUSP15	0.931626
MYL6	0
SNRPF	0.931626
DUSP23	0.00261523
RPS26	8.97661e-11
CYCS	1.34093e-08
NUDC	0.250239
SUV420H1	0.899496
TBL1XR1	0.0857959
PDLIM2	0.931626
ARPP19	0
AP3S2	0.931626
DDX18	0.931626
ACTB	0
GATA3	1.40601e-10
GGH	0.0646009
RARS2	0.931626
YWHAH	7.22034e-07
HTRA1	0
LSM5	0.0859889
MBD3	0.931626
2023-03-02	0.931626
ADAM10	0.563928
C9orf91	0.931626
LPGAT1	0.0837324
CHCHD5	0.931626
NUP54	0.931626
RPS9	0
RAB30	0.851936
IL18	0.931626
SELO	0.931626
CASC3	0.0216765
EIF4A3	0.931626
CYB5A	2.75855e-05
EHBP1L1	0.310932
SNX4	0.931626
EHD1	0.931626
IRX5	0.0389354
TBP	0.931626
RPS21	0
THAP11	0.931626
MARCKSL1	5.6246e-07
TOMM20	2.86882e-06
LARS	0.931626
ABCA9	0.931626
CDC73	0.931626
ACBD6	0.931626
TMEM181	0.36895
DCP1A	0.931626
SMDT1	0.771749
AC074033.1	0.0248434
RB1	0.931626
RALGDS	0.931626
HEXB	0.931626
NGRN	0.858026
STAB1	0.931626
PSMB1	2.74454e-07
ACADVL	0.0438724
DDX21	0.931626
NADK	0.931626
S100A11	0
TNC	2.42603e-05
ZNHIT1	0.931626
TEX30	0.931626
ENAH	0.000782764
ST6GAL1	0.868044
SCAMP2	0.931626
SIGMAR1	0.931626
GPX4	1.68714e-14
RPL36	0
PLGRKT	0.0419519
PLD3	0
NADK2	0.781403
PDP1	0.791964
INSIG2	0.931626
DDX23	0.931626
CXCL10	0.00617822
RPL36AL	2.15287e-12
RPL41	0
VMA21	0.931626
FUCA2	0.354266
PSMD3	0
NDUFB6	0.074479
CLEC3A	1.10707e-06
ILF3	0.135166
HIST2H2AA3	0.83967
SSR2	1.24842e-07
EIF3B	7.38954e-06
TRAPPC3	0.742543
CHST3	0.952466
HSPA8	0
NRBP1	0.00253238
SPCS3	0.199932
HSP90B1	6.21479e-14
CXCL14	4.84661e-12
TWF2	0.661102
C1GALT1C1	0.931626
RPS2	0
MTPAP	0.931626
ADIPOR1	0.00285923
CHCHD1	0.052225
ALDH7A1	0.497921
YWHAZ	0
LAMP1	3.26776e-11
MDH1	0.168074
PRSS23	0
TTC36	0.931626
COL5A2	1.39199e-08
ZDHHC6	0.931626
CDC16	0.606904
DR1	0.931626
EFTUD2	0.931626
DAB2	0.931626
CHPF	0.0262131
SAP30BP	0.931626
GPAA1	0.28935
FTSJ3	0.931626
AGAP3	0.931626
POSTN	0
STARD10	0
IL13RA1	0.000100434
RPL10A	0
RPLP0	0
MED29	5.36422e-05
DBI	1.06341e-10
ARHGDIB	0.00690904
UBR2	0.931626
AIG1	0.931626
SLC40A1	0.931626
XPR1	0.931626
NPC2	0.0288563
RAB32	0.517043
MRPL23	0.931626
NSL1	0.931626
ACACA	1.27108e-14
ARHGAP32	0.636387
MGAT5	0.931626
KTN1	8.59048e-15
HIATL1	0.576025
ATF4	0.184604
TMEM106C	0.57259
CPD	2.0659e-08
SCARB2	0.663181
PSMD14	0.931626
PIGQ	0.899496
THBS1	0
MDFIC	0.931626
GNPNAT1	0.21654
RPLP2	0
ATP6V1C1	0.372478
FBXO28	0.931626
MRPL13	0.0225932
JTB	3.76696e-06
PQLC1	0.931626
VIMP	0.931626
SMG7	0.891053
CYB561D2	0.931626
ARF1	1.83201e-13
PPP1R2	0.905137
ITCH	0.931626
SLC9A3R2	0.931626
TDP2	0.931626
KIAA1551	0.931626
RPS8	0
HNRNPD	0.0689088
DHRSX	0.528639
AP2M1	7.38695e-05
CHMP4B	0.027164
EIF2AK2	0.594931
FAM160B2	0.888033
MFAP5	0.931626
TSPO	0.000647769
FNBP1	0.931626
RASSF5	0.931626
DCTN2	0.00943218
PPT1	0.143238
DUSP1	0.000289687
BET1L	0.931626
NSFL1C	0.931626
FDFT1	0.00321772
ADNP	0.597329
SPINT2	0
U2SURP	0.480749
LAMA2	0.576025
TXNL4A	0.038877
GSPT1	0.00689096
SEPW1	6.76824e-05
WDR43	0.931626
PSMC4	0.00894966
RAD9A	0.369328
MUC1	6.78808e-08
KDM2A	0.0433696
COX6B1	0
LGALS3	0
CISD2	0.931626
NFIC	0.0738581
ROMO1	0
XBP1	0
RPL27	6.09631e-13
NOL9	0.931626
TRPC4AP	1.06369e-09
DHCR24	1.54165e-08
LAMA5	0.640009
CCNF	0.931626
ZDHHC12	0.413381
FAM83F	0.931626
RNF130	0.788707
RAP1B	0.0312021
ADIRF	8.82029e-09
AAK1	0.931626
GLI3	0.931626
PFDN2	0.0705845
CST3	0
RPL3	3.10223e-10
PTAR1	0.931626
ZFP36L2	0
SDF4	0.00269703
RPL8	0
SNRPD1	0.839835
AAR2	0.0461297
API5	0.801011
BMP4	0.931626
PLP2	0.905733
SRI	0.931626
TACC1	0.931626
ACLY	0.383155
TRIQK	0.931626
RPL18A	8.02131e-06
AMY1B	0.934223
RHOC	1.2421e-07
RPL14	4.62612e-05
GON4L	0.931626
CCT5	0.0042834
HADH	0.493321
MRPL24	0.226256
PTMS	0.00206257
ATP6V0C	0.765635
RPS15	0
FRG1	0.931626
UBE2D3	1.18055e-07
SCD	0
INO80D	0.931626
JUP	0.00149477
PHKB	0.931626
NBL1	2.83975e-07
SLC19A2	0.931626
RPL38	1.98489e-10
APPL1	0.931626
SCCPDH	0.000909683
STAT1	1.59791e-08
FAM103A1	0.931626
LRRC75A	5.69045e-07
ERBB2	0
SERPINA3	0
CNN2	0.00550669
NIP7	0.931626
VPS45	0.931626
GLB1	0.161165
PIEZO1	0.931626
PBRM1	0.931626
AGAP1	0.931626
RMDN1	0.931626
RPS24	0
FSCN1	0.931626
EMILIN1	0.013357
FBXO9	0.617348
ARL6IP4	0.12379
RPL35	0
FAM173A	0.931626
SNRNP70	0.595974
SHC2	0.933536
RALY	0.100627
KIF22	0.931626
ANKFY1	0.931626
MACROD1	0.931626
SGSH	0.931626
RPS28	0.000465693
FZD1	0.501839
GCSH	0.591466
VPS41	0.931626
SOX4	0.000492834
STARD3	4.98121e-08
UBE2D2	0.59891
SEPHS2	0.00150805
DNAJA1	0.0229459
EEF2	0
DHX35	0.931626
BTF3	1.66845e-05
ANAPC1	0.931626
ITGA6	0.931626
AIMP1	0.87465
CRIPT	0.931626
PABPC3	0.931626
CERS2	0
TMEM50A	0.0793067
HNRNPH1	3.57445e-06
NDUFS2	0.0907207
DYNLT1	0.032894
PSME3	0.931626
COX7B	1.78939e-05
CBWD2	0.00848383
PTEN	0.888033
SERINC1	0.0325408
CCS	0.931626
THOC2	0.906473
PTMA	0
ITFG1	0.754023
MGST2	0.931626
KLF6	9.99576e-13
SF3B3	0.931626
ALCAM	0.402158
TPK1	0.931626
BCL2L11	0.931626
MTHFR	0.931626
C11orf31	0.000716811
OXA1L	0.322764
LSS	0.447225
IDI1	1.27108e-14
TNS2	0.931626
UBXN2A	0.931626
NDUFS1	0.931626
KMT2C	0.931626
RBM42	0.0606984
RAB7A	0.174894
NDUFB11	0.801138
RHEB	0.281267
SRM	0.39942
ATP1B3	0.931626
TBC1D9B	0.921439
IFNGR1	7.7843e-05
UBE2A	0.486148
PMPCB	0.688241
NIPBL	0.931626
ARF4	6.90191e-07
CCT7	0.0101338
GADD45GIP1	0.519809
MYDGF	0.116218
PPAP2C	0.480238
RPN2	0
RPS18	0
PLEKHG6	0.932587
FRAT2	0.931626
EIF4EBP2	0.410177
CKS1B	0.588455
RUNX1	0.0362911
RPL37A	0
CERS6	0.931626
ZNF90	0
WWC1	0.931626
RPL31	0
CHMP1B	0.931626
PFDN5	0.000814862
RRAGC	0.931626
GMFB	0.273505
KIF13A	0.931626
CBX3	5.67379e-10
CITED2	5.67991e-05
ETV6	0.931626
PRKCSH	0.931626
TMSB10	0
CALR	0
GCNT1	0.931626
CMPK1	0.754513
GPATCH2	0.931626
RPS6	0
TAX1BP1	0.00164619
BHLHE40	0.0276646
MAN2B2	0.931626
S100A14	1.05873e-05
TNS1	0.931626
PGP	0.899496
SLC39A13	0.823521
CA12	0.0180825
IFT52	0.206743
PROM2	4.18366e-05
RPS7	0
LSM4	0.00631163
TCEB3	0.931626
FEM1C	0.931626
PVRL2	3.61148e-07
RAP2A	0.720234
TCEAL8	0.931626
PAK2	0.931626
RPL24	1.73891e-11
RNF166	0.931626
ARID4B	0.931626
RAD23B	0.000221729
C1R	2.9231e-06
HSPA1B	1.25745e-06
CISD3	0
ST6GALNAC4	0.931626
DPY19L3	0.931626
ENPP5	0.83967
TOMM7	0.0388471
ZFAND3	0.174755
CASZ1	0.931626
SHROOM3	0.931626
CCND2	0.511482
RPL32	0
HNRNPR	0.235822
TBCA	0.879013
YDJC	0.931626
COA6	0.236723
MOGS	0.931626
MDM4	0.801011
CREB3L1	0.193384
SEPHS1	0.931626
EIF4G3	0.848077
USP33	0.931626
PER3	0.931626
GIT1	8.92304e-09
SERTAD3	0.49535
FLNA	3.6092e-09
TOMM40	0.434595
FGFR1	0.931626
STAM	0.931626
AHNAK	2.78869e-06
DDR1	0.168286
OSBP	0.931626
ATP5E	0
SEC13	0.834122
ZNF532	0.931626
FIS1	0.906473
TP53INP2	0
PSMG3	0.931626
KPNA3	0.931626
SYK	0.931626
CBWD7	0.0837207
SNX7	0.931626
PIGT	1.0336e-09
SPOPL	0.208527
CUEDC2	0.507841
SMC1A	0.207576
TOM1	0.931626
DUSP22	0.931626
TOM1L2	0.931626
SPRED2	0.931626
CCDC176	0.931626
VAV3	0.673951
RPN1	1.69764e-06
TUBA1A	2.26115e-05
COX7C	2.53594e-08
CTNNAL1	0.931626
COA3	0.911356
CDC42	0.000123219
MRPL12	0.425477
ADI1	0.114506
ACVR1B	0.931626
UBP1	0.931626
RNF11	0.382896
NEBL	0.851936
RARRES3	0.0301448
PRKAR2A	0.328929
PSMD1	0.931626
SAFB2	0.931626
ALDH18A1	0.228995
SLC11A2	0.650501
SCAND1	0
HLA-B	0
EIF1	2.93716e-09
GRINA	0
KPNB1	0.0231815
HNRNPL	4.342e-12
BLVRB	0.00133233
DAXX	0.931626
PRKAR1B	0.931626
FAM213A	0.0436299
CD2BP2	0.931626
HGS	0.698308
SSR1	0.0189415
RAE1	0.0111873
PRMT1	0.0884266
GHITM	1.93741e-06
AQP1	0.931626
COL18A1	0.00991532
COL6A1	2.09745e-05
MGST3	1.26545e-06
ADAM28	0.931626
MAP2K2	2.57465e-06
NPLOC4	0.931626
TIMM10	0.515998
HCCS	0.926087
CLEC7A	0.931626
FANCL	0.931626
TSTD1	1.7161e-10
SSR4	0
B4GALT5	0.931626
MMP14	0
CLDN4	9.14776e-05
GLUD1	0.000473034
TAOK1	2.45894e-07
HMGXB3	0.931626
ZFP36	3.3425e-11
STK38L	0.931626
TRADD	0.931626
ACTR3	0.0214205
EIF4G1	1.08587e-12
COMMD7	0.931626
EML4	0.637146
HSPB1	9.41955e-09
PSMB8	0.446622
GNAQ	0.621344
RAB7B	0.931626
XRCC6	0.00269123
H2AFZ	1.13225e-12
EEFSEC	0.931626
SPARC	0
WDR37	0.931626
FAM129B	0.931626
COL12A1	0
MPDU1	0.931626
AC006386.1	0.931626
YWHAB	1.33765e-06
TP53INP1	0.0032724
RPL36A	3.7129e-05
NBPF26	0.931626
METTL21A	0.931626
COMMD3	0.406831
WDR74	0.931626
PTPRS	0.0912366
PDPN	0.588156
ARHGEF12	0.132656
BPTF	0.931626
PPCS	0.465977
SLC12A9	0.931626
EPB41L5	0.931626
NDUFB4	0.0582061
GIPC1	0.484799
DNAJB2	0.795122
CARS2	0.870871
VOPP1	0.931626
TTC8	0.931626
SS18	0.812701
ZEB1	0.931626
PRCP	0.931626
CNIH1	0.00443705
TRAPPC12	0.931626
FAM86C1	0.931626
EIF6	9.65646e-12
AKAP1	0.931626
RNF145	0.931626
RPL30	0
CPNE1	8.73108e-08
RBM38	0.164636
PCOLCE	0.128282
CDC42EP5	0.931626
CPNE2	0.931626
EP300	0.931626
RPS3	7.50205e-11
FAAP20	0.931626
CRELD1	0.931626
EGR1	7.67238e-05
EIF2S3	0.62958
ATP5C1	0.180245
C4A	0
RPS20	0
IFITM3	0.000421246
RETSAT	0.743271
TP53I13	0.00619099
KCNS3	0.931626
CNIH4	0.134175
ATP6V0E1	0.376206
HNRNPF	1.10097e-07
PMF1	0.931626
RWDD1	0.414167
RNH1	0.902262
UBB	0
IMPA2	0.931626
HERPUD1	2.52626e-05
WBSCR22	0.000998029
LTF	0.37921
TGOLN2	0.162658
MRPL11	0.931626
HES6	0.931626
PHF20	0.0160304
EIF5A	0
MGST1	0
TCP1	0.217839
CPSF6	0.742148
OCIAD2	0.533626
RRM2B	0.931626
INF2	1.08423e-05
SOGA1	0.00385626
PGM3	0.931626
GGCX	0.791253
TMEM87B	0.931626
BBX	0.931626
DAPK3	0.821463
MUL1	0.931626
CDK7	0.931626
NIT2	0.931626
MTDH	0.000471291
DSP	0.0309882
SON	0.167216
JADE3	0.931626
LFNG	0.667532
CTTN	5.80972e-10
UBE2S	0.931626
OMA1	0.939416
ADGRG1	5.6825e-06
PKP3	0.931626
PSKH1	0.931626
TGIF1	0.931626
SIRT2	0.00792717
TATDN1	0.931626
GALNT6	0.0654474
C5orf63	0.931626
MRPL45	0.000538272
ATP6AP2	1.83201e-13
RPSA	4.007e-05
RPS19BP1	0.931626
ANXA2	0
GGA2	0.931626
FCHO2	0.931626
KLHL36	0.931626
DCAF6	0.323578
CRIP2	3.84899e-08
EDF1	2.52643e-06
NSDHL	0.931626
UBTD2	0.931626
EIF1AX	3.84303e-06
SAMD4B	0.00590836
GPR160	0.0447395
PTK2	0.132512
P4HB	0
RABAC1	0.0033011
ZNF12	0.931626
PAFAH1B2	0.664093
BLMH	0.931626
IQGAP1	9.00616e-05
LGALS7	0.931626
PNRC2	0.931626
CD74	0
ATP2C1	0.0209171
EPB41L2	0.931626
SEL1L	0.0138055
ECH1	4.35517e-15
RPL23	0
MPI	0.931626
MYH9	0
GNAS	0
GOLGA8B	0.931626
PTPRU	0.931626
ETNK1	0.263613
SPIRE1	0.931626
RPL28	0
HSPA5	1.62089e-05
FAM177A1	0.931626
NDUFB9	1.17826e-12
KLHDC9	0.931626
FO538757.2	0.931626
RPS27A	0
RPLP1	0
PHC3	0.931626
COL3A1	0
RTN4RL1	0.931626
MMP11	2.24981e-06
UQCC3	0.931626
HMGA1	0.000158657
MOB1A	1.29377e-06
RCN2	0.0273687
HDAC11	0.931626
GBAS	0.57259
NFAT5	0.931626
NDUFA1	0.0019145
RTCB	0.394598
DMKN	0.931626
RUFY2	0.931626
CHD1L	0.931626
CD9	0
VSTM2L	0.931626
RPS12	0
FAM118B	0.931626
CASP8AP2	0.931626
G3BP2	0.0756015
APTX	0.931626
PURB	0.931626
ARHGAP29	0.931626
SLC25A3	5.79284e-08
SF3B1	0.391706
UBA3	0.179592
RPL5	9.6885e-11
DYNC2H1	0.931626
PPIE	0.931626
SUPT6H	0.606608
DNASE2	0.864576
TRAPPC5	0.931626
HADHA	0.126922
FBRS	0.637382
PCMTD2	0.931626
CAP1	0.0251776
RC3H2	0.931626
VAMP8	0.33327
SYNRG	9.99522e-07
GGNBP2	0.791253
ERBB3	4.4706e-09
MLF1	0.931626
EEF1D	1.49302e-05
POLR3E	0.931626
PGAP3	7.54614e-06
S100A9	0.000446611
MGP	0
CHMP3	0.00078347
TPM2	0.613756
AUP1	0.931626
COX4I1	3.56276e-10
ASNA1	0.319255
NDUFA11	0.043598
MTRNR2L1	0.88939
ARHGAP23	0.12638
UBE2B	0.428876
RPL23A	0
FTL	0
PTCD1	0.931626
RGMB	0.931626
TMED2	8.59048e-15
RPL18	8.64829e-07
WAC	0.153561
GIGYF2	0.931626
MALAT1	0
MRFAP1	1.32654e-07
UHMK1	0.796547
FBL	4.4825e-12
PTBP1	5.12885e-08
LAMP3	0.931626
EDEM3	0.778197
BCL2L1	0.931626
RNF19A	0.858026
SERF2	0
RGPD5	0.931626
NETO2	0.931626
UBE2R2	0.739503
PLEKHS1	0.931626
PLOD3	0.931626
TMEM147	2.05075e-06
ZBTB42	0.931626
KIAA0355	0.931626
SLC44A2	0.21654
PMVK	0.931626
CD46	4.35517e-15
MXRA8	0.0543531
QSOX1	6.23794e-07
ARHGAP35	0.284821
NUPR1	0.145715
SLC25A16	0.931626
ABHD8	0.931626
MBOAT7	7.49742e-06
CD52	0.507419
FAM111A	0.931626
REPIN1	0.931626
MCAM	0.240041
IMMP1L	0.931626
EPHX1	0.481261
BCLAF1	0.346519
RNF144A	0.931626
ITGB5	0.00368123
TMEM97	0.931626
SDHD	0.931626
MICAL3	0.931626
ASMTL	0.931626
UBXN4	0.400586
ACTL6A	0.931626
BZW1	2.65208e-07
VDAC2	0.323578
VPS51	0.931626
TPT1	0
ASAH1	0.0116039
SLC39A9	0.69084
LEMD2	0.931626
P2RY11	0.931626
SSBP2	0.931626
SRSF3	0.000954563
CHCHD2	0
NME3	0.407581
VRK3	0.931626
NME1-NME2	0.931626
NEGR1	0.931626
GUK1	0.00579735
ULK1	0.931626
GOLM1	1.47677e-06
CEP70	0.931626
HEXA	0.758532
C11orf58	0.000222802
ACOT13	0.772931
ISOC2	0.370444
PPP4C	0.064396
HLA-DPB1	0.0842732
LOX	0.103736
DPAGT1	0.931626
MIEN1	0
CDK8	0.931626
TNFRSF12A	0.242819
MRPS21	0.550645
CDCA5	0.931626
PAIP2	0.520688
RP11-2C24.9	0.931626
AP2B1	0.66895
SSR3	3.39529e-07
STK40	0.931626
TRMT10C	0.931626
C1QA	8.61856e-06
APOD	1.68764e-09
TMEM184B	0.721553
TM4SF1	0.000131469
RPS19	0
ADAM9	0.207411
PATL1	0.931626
NECAP2	0.929729
RHBDD2	0.382809
RPL7A	0
WAPAL	0.931626
ALDOA	0
THRAP3	0.931626
BTBD10	0.931626
MIDN	9.562e-13
YWHAQ	1.16889e-08
YTHDF3	0.627221
ABR	0.931626
ACSL4	0.931626
VDAC1	0.0209574
CALD1	5.11384e-05
BLCAP	0.0148248
CDS1	0.764865
SSH2	0.931626
EFNA1	0.286435
PDZD8	0.931626
PEX13	0.931626
IKBKG	0.931626
DDX60	0.931626
PREB	0.931626
TCIRG1	0.931626
CACYBP	0.00619941
PEBP1	8.71749e-06
IGFBP4	2.06783e-10
ANO6	0.557098
LAPTM5	2.21793e-07
ITGB2	0.0776581
TMA7	0.00565497
CDK2AP1	0.419774
UGP2	0.0363285
MRPL18	0.931626
SLC43A1	0.931626
SLC2A4RG	0.00836986
PSMA6	0.931626
CAPN2	8.95326e-06
RPS11	0
GJA1	0.318549
TMEM119	0.321571
LAMTOR2	0.463952
SRA1	0.931626
MAGEF1	0.853839
RCHY1	0.931626
SH3BGRL	0
FAM120A	0.291991
SLC38A2	7.82918e-09
DDAH1	0.931626
FXYD5	0.749781
NAP1L4	0.00572491
TAPBP	0.00699689
NFIB	0.931626
IGSF8	0.931626
ACP5	0.389481
YY1	0.467267
WDR5	0.931626
TMSB4X	0
TRAF4	0.50073
TPR	0.931626
PDLIM7	0.931626
SMU1	0.931626
NUP188	0.931626
GLMP	0.931626
RPL17	0.000126662
GRB7	1.02676e-05
SFRP4	0.0759978
EEF1A1	0
SORBS3	0.84965
NCK2	0.931626
MLPH	0.247384
SH3BGRL3	0.931626
ZNF740	0.931626
TIMM23	0.794624
LY6E	0
MAL2	0
FAM214A	8.71922e-06
PFN2	0.931626
JKAMP	0.159142
CREBZF	0.395843
PSMD6	0.6573
SLC2A6	0.931626
LAGE3	0.931626
MZT2B	4.47207e-06
TNKS1BP1	0.663724
TMUB2	0.931626
FAM195A	0.931626
PDE6B	0.931626
GINS2	0.931626
CRAT	0.931626
CNNM4	0.871476
SFPQ	0.00308915
PSME2	0.0260442
CLTC	0.00105546
UBC	0
SDCBP	0.931626
ACSL1	9.0964e-05
ECHS1	0.931626
PPTC7	0.931626
PERP	0.0045538
BAMBI	0.00224839
ENSA	0
SARAF	2.69666e-05
HIGD2A	0.931626
FAM195B	0.771333
PABPN1	0.0486955
KDM1A	0.931626
PTGFRN	0.781403
FLOT2	0.931626
SENP7	0.931626
CYHR1	0.0402919
SEZ6L2	0.931626
BCCIP	0.931626
CRNKL1	0.931626
NT5C3A	0.931626
MPZL1	0.0700682
AC010642.1	0.931626
MED14	0.931626
SLC25A24	0.523783
RPL22	1.45789e-08
HM13	0.0251562
BGN	5.50142e-09
CXCL12	0.000171079
2023-03-07	0.9332
FBXW4	0.482738
POM121C	0.790083
LRRC32	0.790483
MAX	0.467659
MAGI1	0.931626
GLUL	4.35517e-15
IGFBP5	0
CSDE1	5.92752e-06
CCDC6	0.345509
CERS4	0.0476334
A2M	0
SASH1	0.931626
EEF1E1	0.813494
NAAA	0.931626
ATP5G3	1.85805e-05
CD24	0
COPG2	0.931626
NUDCD3	0.604001
ARL6IP1	2.82963e-10
IER2	0.391309
ZEB2	0.931626
ACOT2	0.931626
RAB21	0.907452
CBX1	0.777678
TRIM25	0.931626
DGCR6	0.931626
EPAS1	0.0469974
RPL37	0
MAP9	0.931626
TACSTD2	0.00179409
AREL1	0.931626
AES	4.5792e-07
RBBP6	0.6158
LAMP5	0.931626
CLDN7	6.51056e-05
TRMT112	0.404449
C12orf29	0.931626
TCN2	0.931626
SELM	4.16597e-07
TIMP1	2.62443e-06
HP1BP3	0.683877
PPP5C	0.691674
TFDP2	0.931626
CST1	0.000516642
ABHD17A	0.193226
KHDRBS1	0.124863
EIF3E	0.0251651
USP3	0.931626
PSMB5	0.00140023
LAMB2	0.931626
STAT6	0.931626
POMZP3	0.931626
EZR	5.56914e-11
AP1S1	0.247196
BTG2	0.495272
DNAJB1	0.00153735
CYBRD1	0.018521
ATP6V0D1	0.931626
POTEE	0.931626
TPM4	0.00997971
FAP	0.603667
SERPINF1	0.00315943
GMPS	0.931626
DCN	0
NUTF2	0.000209808
C7orf26	0.931626
HN1	0.931626
VCP	1.31876e-05
ZC2HC1A	0.931626
MRPL41	0.0174744
AP2A2	0.149202
ISCU	0.931626
NUSAP1	0.931626
REEP4	0.931626
QRICH1	0.931626
THY1	0.0296505
LMAN2	3.01133e-05
RPS27	0
TFE3	0.931626
RAC1	9.1933e-06
PPP1R12C	0.931626
STOML2	0.848756
UBA52	0
HID1	0.21654
CTSD	0
CDKN1C	0.931626
ISG15	0.710928
FAM134B	0.931626
RPL10	0
SDC1	0
PLCG1	0.931626
DDX1	0.141616
CLSTN1	0.931626
PBX1	0.931626
PRKCD	0.437121
TM9SF3	0.0174744
MTMR12	0.682657
NCL	3.00305e-05
RPL4	1.88655e-10
GPRC5A	3.35134e-05
KCNK1	0.931626
AEBP1	0
RAB18	0.00349194
HMGB1	5.27572e-06
LRRC59	0.931626
ZNF471	0.931626
CORO1A	0.788707
SIPA1L3	0.0325408
2023-03-02	0.931626
RBMS3	0.931626
WFDC2	9.33096e-10
FRMD8	0.931626
CC2D1B	0.931626
PSMA7	0.160803
AC113404.1	0.806449
IMPAD1	0.221345
C19orf24	0.931626
TIMM17B	0.117039
RANBP2	0.558527
ATP5EP2	0
SRSF6	2.69096e-05
APBB2	0.931626
CIPC	0.931626
ZNF704	0.931626
ATXN10	0.380107
DHFR	0.931626
ECSIT	0.931626
DDX3X	3.55513e-07
PCBP1	3.0725e-05
ABAT	0.931626
LRP10	0.0021898
SHROOM2	0.931626
XRN1	0.931626
FANCI	0.931626
DST	0.088726
DERL1	0.0194448
GATAD2A	0.931626
MIF	4.16019e-08
MAZ	0.931626
EIF2B5	0.931626
IFI44	0.931626
TAGLN2	0
SRD5A3	0.732819
EWSR1	0.317503
FLNB	0.0790626
CYB5R2	0.907109
ARCN1	0.0738102
PCSK6	0.931626
LAMB1	0.244955
RASAL2	0.931626
GTPBP6	0.931626
PHB	0.592024
ATP6V0B	0.229172
ATG101	0.931626
EIF3A	0.37827
C16orf89	0.121235
RP11-231C14.4	0.737123
RPL6	1.40206e-08
MCOLN1	0.931626
SRPRB	0.556887
UQCC1	0.0587979
NET1	0.309893
CANX	2.45751e-08
PPP1R12A	0.931626
GSTO1	0.671698
SDHA	0.834995
DNM2	0.409374
HNRNPA3	0.00110269
GSS	4.27202e-11
HACD2	0.275673
ARFIP1	0.931626
CPE	3.92084e-11
IRF6	0.931626
C3orf14	0.772414
ALYREF	0.471205
LUM	0
TMEM203	0.931626
SSH3	0.50586
ACP1	0.0670239
SYMPK	0.931626
GLRX5	0.136862
SFT2D1	0.50586
GAS1	0.0839495
TMEM30B	0.931626
ST13	0.0022128
ITM2B	0
LSP1	0.931626
FMOD	0.192149
SC5D	0.893329
MYL12A	1.55167e-07
HLA-A	0
NFKB1	0.931626
ARL2	0.931626
B2M	0
RPS6KB2	0.676508
SNW1	0.931626
TBC1D9	0.27496
CD59	0
FDPS	0.837816
CST4	0
ST14	0.37904
C15orf48	0.332112
NBEAL1	0
FAM107B	0.931626
MLLT10	0.931626
HILPDA	0.931626
POGZ	0.799226
TOB1	0.0756015
TAP1	0.0117487
TMEM59	0.210874
FMN1	0.931626
YIPF1	0.931626
RFC2	0.931626
CRLS1	0.931626
CNN1	0.931626
AK3	0.931626
CD36	0.931626
ZNF24	0.931626
PRDX6	1.05272e-08
AIFM1	0.649316
ETF1	0.312331
RPS13	0.000302267
FAM126A	0.931626
MUC20	0.931626
CFLAR	0.931626
KCTD10	0.831225
DHX9	0.000880938
SYTL1	0.931626
IRF2BPL	0.931626
HTATSF1	0.391706
KRT8	0
NDUFS6	0.557498
GABARAP	0.874363
RRAS	0.931626
C1orf56	0.931626
TMX2	0.931626
GOT1	0.931626
ANXA6	0.389258
CRABP2	5.10535e-06
PLEKHM1	0.931626
APP	1.0336e-09
RPL19	0
TCF25	0.803449
ANXA4	0.255722
PCYOX1	0.931626
ITGAV	4.02731e-09
HNRNPUL2	0.839835
GTF2H5	0.700552
MAP7	0.931626
BLOC1S1	0.169824
CHPF2	0.931626
SNAI2	0.931626
CAT	0.400586
FLYWCH2	0.931626
ZFP64	0.931626
PLVAP	0.038082
THOC7	0.507841
PPDPF	1.72688e-06
RNF213	0.016162
RPL29	0
SYF2	0.705293
SPCS1	6.6094e-12
VWA9	0.931626
DCAF15	0.931626
ZNF622	0.931626
GNB2L1	0
SAT1	4.63764e-07
CECR1	0.931626
ADPGK	0.931626
FUBP1	0.404449
TAGLN	0.931626
EFHD1	0.0374506
RNASE6	0.931626
ATP5B	4.7019e-13
CCND1	9.60678e-12
NAPEPLD	0.931626
PAPSS2	0.701505
PDE5A	0.931626
PIP4K2A	0.931626
HCFC1R1	0.00417476
CBWD1	0.0016648
NCAPH2	0.931626
ZNF517	0.931626
ACAD8	0.931626
SOD1	7.64388e-06
SFXN4	0.931626
CSNK1D	0.931626
TIMM10B	0.931626
CDC6	0.112411
BHLHE41	0.826195
SUSD3	0.608761
GPC3	6.32496e-06
OGG1	0.931626
FAM92A1	0.931626
MAP4K5	0.871083
STAT2	4.61833e-06
CDCP1	0.931626
PPP1R1B	0
MTA1	0.0620719
SURF1	0.931626
PDCD10	0.303142
KRAS	0.931626
IGFLR1	0.931626
KPNA2	0.237551
ASCL2	0.931626
EDARADD	0.931626
RNF187	0.931626
SMIM22	0.864576
OAT	3.61021e-08
LITAF	0.0281356
TM9SF2	1.31719e-06
JMJD1C	0.749781
HNRNPH3	0.269844
SPDEF	2.06068e-10
JUNB	0.124863
DEGS2	0.382049
RAB25	0.931626
PRRC1	0.88939
MZT2A	0.00105422
TCEAL4	0.0299324
C7orf73	0.633607
MBNL2	0.794798
DCTPP1	0.931626
COL7A1	0.931626
CASP6	0.931626
SNX17	0.589718
SLC27A4	0.603713
RAB5A	0.851913
PHYH	0.931626
LIMA1	0.364527
PLEKHG3	0.931626
CREB3	0.806719
SQLE	0.0013756
EHMT1	0.84938
MTRNR2L12	0
LSR	0
ADRBK2	0.931626
MBD4	0.931626
AKTIP	0.931626
TMEM126A	0.931626
MANBAL	0.0068471
WSB1	0.00156393
RPS14	3.83643e-12
ELK4	0.797281
CFH	0.931626
NSA2	0.868315
AURKAIP1	0.931626
MFSD7	0.807294
RANBP9	0.798952
ELOF1	0.931626
PEX26	0.673951
NPHP3	0.931626
CGRRF1	0.931626
MYEF2	0.931626
PHRF1	0.931626
ERF	0.931626
MAP4K3	0.931626
CCNI	0.0497414
CNOT2	0.27496
NVL	0.931626
STT3B	0.0378969
UQCRFS1	0.0129832
SENP3	0.931626
RPL27A	0
COX6A1	0.0448691
BTG1	0.333403
YBX1	0.000369082
SPIDR	0.931626
MRPL3	0.110239
ATP13A3	0.848219
GPR137	0.931626
TGS1	0.931626
MMP24	4.59804e-06
C14orf119	0.931626
GYPC	0.931626
NPIPB11	0.931626
RPL15	0
NUDT5	0.931626
IFNGR2	0.165837
SEC61A1	2.93716e-09
NANS	0.440687
SERP1	6.60519e-06
RXRA	0.931626
HGSNAT	0.931626
SDCCAG3	0.931626
THAP5	0.931626
HNRNPA2B1	0
ANTXR1	0.0033786
SNRPE	0.000374865
SERPING1	0.732479
CNOT6	0.931626
PSMC6	0.0284747
USB1	0.931626
DEDD	0.931626
PSMB3	2.52643e-06
SRGN	0.931626
CAPZB	0.0314896
RPL9	0
GGCT	0.000482668
CAPNS1	0.0633385
FABP5	0.931626
PGM1	0.931626
NDUFAF1	0.931626
WSB2	0.169944
MGEA5	0.469862
IP6K2	0.910384
TYMP	0.000675566
USF2	4.35517e-15
YARS	0.931626
CALM2	0
RPL11	0
SEMA3F	0.349634
YME1L1	0.155775
MFSD12	0.275732
MCM2	0.931626
SLC17A5	0.931626
PPM1K	0.931626
SYNJ2BP	0.905537
MPRIP	0.786808
PTPRM	0.931626
APC	0.931626
FAM200B	0.931626
RPS15A	0
ELF1	0.735929
PCED1A	0.931626
SRRM1	0.931626
RBM3	6.24355e-05
THRSP	0.931626
COMT	0.097702
RPL26	6.96308e-10
UBE2I	0.0726189
DGUOK	0.931626
CCNL2	0.931626
BRE	0.931626
RAB5B	0.076481
RNPEP	0.869969
FBXO31	0.936328
RPS23	0
BTBD1	0.931626
GSN	3.04397e-08
TBC1D17	0.931626
DPM1	0.593687
CLNS1A	0.507419
AEBP2	0.931626
THBS2	1.12181e-07
RAD54L2	0.931626
NACC2	0.931626
GTF2F1	0.931626
MT2A	7.38695e-05
NCBP2-AS2	0.931626
JUND	0.232714
LCMT1	0.731112
NDUFS5	0.157777
GOLGA5	0.931626
TGFBR2	0.931626
UTP15	0.931626
FYB	0.931626
COX5B	0.0229858
RTFDC1	0.216768
TNIP1	0.735442
LASP1	2.74451e-13
TUSC1	0.931758
FAM174A	0.840174
KLF2	0.931626
RHOB	2.17942e-07
HDAC1	0.931626
NAA60	0.931626
MAPK8	0.931626
HIPK2	0.931626
H2AFV	0.0898178
CD81	0
COL1A2	0
LINC00493	0.931626
RABEP1	0.796547
MAGEH1	0.931626
BAG1	0.745677
LTA4H	0.931626
EFNA4	0.931626
ZNF317	0.931626
IGFBP3	0.00783324
FRS2	0.931626
LRRC8A	0.931626
SREBF1	1.45989e-07
MARK3	0.931626
SLC25A5	5.40067e-12
NDUFB1	0.0382735
TC2N	0.248832
SNX13	0.931626
AGO2	0.931626
EZH1	0.931626
WHSC1	0.931626
MSH2	0.931626
ZG16B	0.647801
EIF3CL	0.931626
GRAMD1A	2.09009e-14
RER1	0.0271745
DCTN5	0.931626
TMEM5	0.931626
MYO6	0.0433792
ZYX	3.2151e-06
NUDCD2	0.931626
EFEMP2	0.112039
TMEM121	0.931626
UBE2V2	0.130739
ZMIZ1	0.312577
RBM17	0.931626
EVI5L	0.931626
DDX17	0.0592791
KIRREL	0.931626
ADAMTS15	0.931626
UBL5	0
AIDA	0.931626
CACNA1H	0.931626
ZNF302	0.931626
WFS1	0.931626
SH3PXD2A	0.931626
PRAF2	0.931626
CDC25B	0.931626
PLXNB2	0.00416624
PHF14	0.931626
PTPN14	0.840309
DSE	0.000257544
PPAPDC1B	0.931626
MPV17	0.931626
SPPL2A	0.000243967
RPS16	0
MYB	0.931626
ATP5L	1.78432e-05
TWSG1	0.0809486
SMIM7	0.19913
CHP1	0.931626
GPR143	0.931626
APOE	0
NSUN5	0.931626
ATP8B1	0.816475
CWC25	0.931626
RSBN1L	0.931626
OS9	0.00136308
FBXL3	0.757331
CREB3L2	0.931626
DNAJB11	0.403192
HERC2	0.931626
UBXN6	0.587671
NDUFV1	0.931626
BMPR2	0.931626
NUDT16L1	0.416645
TMCO3	0.770474
ZNF606	0.931626
NUCB1	0.931626
PIK3R1	0.8092
CDK2	0.570745
TIMP3	0.000265514
CLU	0.0578853
PPIA	4.56218e-10
HPN	6.32687e-12
SIGIRR	0.931626
DCXR	0.931626
CLTA	0.0179999
UBXN8	0.931626
PSMA4	0.0370162
HSPA1A	0.0547805
DLGAP4	1.20383e-07
PRMT5	0.931626
SMARCD2	0.931626
MED16	0.931626
C1S	0.00141703
NCK1	0.931626
PCGF5	0.931626
PRDX5	0.555231
SAMD1	0.503542
NUS1	0.931626
POFUT2	0.931626
HDLBP	0.017809
ERGIC2	0.931626
NIPAL2	0.30746
ABCA1	0.931626
PRKRA	0.931626
TXN	4.41181e-06
TMEM33	0.0655786
ZC3H11A	0.931626
ADAM15	1.64586e-05
VPS28	0.380537
GAB1	0.931626
AJUBA	0.939628
SERTAD1	0.931626
SYNGR2	1.2899e-06
FBXW2	0.619739
UAP1	0.393197
AZGP1	0
MTHFD1	0.923456
SEC61G	0.00136691
PPP2R3C	0.931626
R3HDM2	0.931626
RSL24D1	5.40643e-10
SYAP1	0
ABCE1	0.931626
PFDN6	0.615828
AGK	0.931626
UBL4A	0.931626
TMC4	0.931626
CNOT11	0.931626
ACTR2	7.8003e-10
NDUFC1	0.421739
CLASRP	0.931626
COL16A1	0.00914597
C16orf13	0.931626
MOCS2	0.931626
ZNF280D	0.931626
ARHGEF40	0.931626
RASSF3	0.931626
NAPA	0.0418556
FHOD1	0.292247
AKIRIN1	0.931626
CCNC	0.118744
CSTF3	0.839835
ORMDL2	0.931626
NDUFA2	0.0977654
ZNF672	0.94919
NUDCD1	0.931626
USO1	0.931626
TRAPPC9	0.931626
RAB11FIP3	0.931626
SEC24A	0.931626
CLDN11	0.931626
KCNK6	0.0486502
AKT1	0.00541001
LUC7L3	0.742148
NPIPA8	0.931626
PXMP4	0.931626
YTHDF1	0.931626
SULT1A4	0.931626
FAM192A	0.931626
EML1	0.931626
SEC22B	0.850718
ASXL1	0.931626
PIK3R2	0.931626
CRKL	0.931626
ZNF641	0.931626
ATG7	0.931626
DDIT4	0.613198
GTPBP4	0.130209
TCTN3	0.931626
APOL3	0.931626
HSDL1	0.931626
CTDSPL	0.931626
DHCR7	0.536358
PMEPA1	1.16064e-08
SF3A3	0.931626
PODXL2	0.633607
PYROXD1	0.931626
RGS4	0.931626
ABHD11	0.931626
HRAS	0.931626
SUN1	0.931626
PRKAR1A	0.0700234
MVK	0.931626
CTSS	0.11565
SP110	0.931626
FKBP2	0.124109
HEXIM1	0.931626
GANAB	0.0638262
SNX18	0.931626
HSPH1	0.280494
PTPN6	0.931626
CUTA	0.667532
NR2F2	0.00870192
VPS54	0.931626
DCTD	0.706402
EPHB4	0.000196336
PEA15	0.149694
PLXDC2	0.931626
RNASET2	0.000113777
PPA2	0.264776
IL6ST	0.0279333
SLC25A36	0.758158
CYBA	6.39402e-07
RGL1	0.931626
2023-09-07	0.678246
LILRB4	0.931626
PUM2	0.512974
ABL1	0.931626
ARHGEF7	0.931626
TMED10	1.96989e-10
FBXO7	0.931626
IRX2	0.868044
PFN1	0
CTSZ	0.108309
PIGM	0.931626
GAPVD1	0.931626
FZD6	0.5713
FBLN2	0.014342
ITGAX	0.801011
UQCRC1	0.0692374
LAPTM4A	0
KIFC1	0.00301035
PTGDS	0.931626
GDI2	3.22317e-07
BCS1L	0.931626
ELOVL5	0.0251562
BAD	0.931626
SLC20A1	0.771333
TIMM50	0.528639
CREB1	0.931626
RAB38	0.931626
IDH1	0.671276
RAB10	0.0639754
FAM53B	0.931626
CCM2	0.931626
RASA4	0.931626
COL8A1	0.875949
ERBB2IP	0.345509
TKT	0.931626
HSCB	0.933536
PTRHD1	0.931626
EIF3H	3.12073e-05
ABCC5	0.931626
CXXC5	0.000432539
FAM53C	0.931626
SF1	0.826195
VAMP7	0.931626
SRC	0.0288383
ANKH	0.466695
S100A16	0.00275779
VMP1	3.72864e-10
LAD1	0.90099
SP3	0.931626
TPI1	2.47341e-06
RBM18	0.931626
GOLGA4	0.243317
NUB1	0.907109
GBE1	0.931626
KDELR2	0
CTPS2	0.407143
SOX11	0.931626
UBA2	0.931626
SIAE	0.931626
ARL8B	0.780715
PBX2	0.931626
PURA	0.931626
ZMYM4	0.931626
GBA	0.931626
SPPL3	0.931626
TIPRL	0.760647
HIP1	0.931626
ISYNA1	0.931626
WDR26	0.00480819
ZNF580	0.931626
WDR36	0.931626
HDGFRP2	0.931626
SOD2	0
TRA2B	0.0700682
SLC2A1	0.931626
MAEA	0.885892
COMMD1	0.931626
FARSA	0.931626
ARHGEF2	0.698308
ARFIP2	0.547299
ILF2	0.0207351
SNRPA1	0.931626
MAGOHB	0.931626
USMG5	0.00763595
COPS5	0.242586
SLC39A6	2.37733e-05
OCIAD1	0.0815495
AQP3	0.931626
IKZF3	0.470892
NSUN2	0.931626
CHMP1A	0.050498
CDK11A	0.931626
CD99	8.30369e-06
DRG1	0.906473
MYCBP2	0.931626
ZSCAN18	0.931626
MBOAT2	0.931626
ELL	0.931626
C16orf62	0.931626
C3	2.42603e-05
POLDIP3	0.931626
VCAN	2.56704e-09
GOLGB1	0.931626
EIF3F	0.0302301
ESYT1	0.0278625
RHOA	1.87063e-08
PYCRL	0.931626
TTC37	0.144692
AP3S1	0.771333
SERPINA5	1.22993e-08
LGALS3BP	0.318549
CREG1	0.0884266
PNPLA4	0.347917
PREPL	0.931626
DGCR14	0.931626
STIM1	0.172351
HNRNPA0	0.195498
GLS	0.271801
LAMTOR3	0.931626
ZBTB7A	0.931626
CBR1	0.858026
COL1A1	0
MTO1	0.931626
MYLK	0.109843
GTF2H2C	0.931626
JOSD1	0.931626
STXBP5	0.931626
RTN4	8.59048e-15
ZC3HAV1	0.931626
KRT18	0
ANXA5	4.75749e-08
PSMA2	0.0022626
SNX3	0.00142351
MLLT4	0.533626
UGGT1	0.407921
DGAT1	0.931626
ZNF395	0.931626
LIPA	0.907452
IL27RA	0.931626
ABHD12	0.931626
CPEB4	0.931626
METAP1	0.931626
TCERG1	0.931626
PTTG1IP	3.77684e-05
NR2F6	0.0136973
RAP1A	0.899496
LETMD1	0.931626
RIN2	0.674226
CCDC130	0.931626
EPHB3	0.931626
NCOA4	0.000526104
EMC8	0.931626
RP11-345J4.5	0.931626
GLYR1	0.837816
PDXDC1	0.0584428
JAGN1	0.931626
LEPROTL1	0.931626
CSNK1A1	0.00501853
RNF13	0.931626
ERCC5	0.931626
CENPB	0.115745
CENPT	0.931626
INPP4A	0.931626
SYT7	0.433345
NEK9	0.931626
SCGB2A2	5.59765e-09
ZBTB43	0.931626
SF3B2	0.931626
PDE4DIP	0.557098
CHD6	0.917615
PDAP1	0.931626
CARD10	0.931626
TRAM1	3.79083e-10
KIAA2018	0.931626
EVL	0.931626
C9orf16	0.30746
EMB	0.931626
KIF5B	0.00562928
BSG	1.55878e-05
KMT2E	0.931626
WDR1	9.23943e-05
MOB2	0.931626
EGR3	0.931626
TIMM9	0.931626
SLC1A4	0.931626
COMMD6	0.00151472
TMEM230	0.931626
OAS2	0.931626
RARS	0.378931
CTSC	0.0138539
LAMTOR4	0.586199
KIAA1467	0.931626
ASF1A	0.931626
MCM3	0.250546
TRAPPC6A	0.931626
APOC1	9.85644e-14
PAMR1	0.931626
SLC16A2	0.931626
LMO7	0.931626
IGF1	0.931626
CALU	0.000218568
ANKRD28	0.931626
SMYD3	0.931626
MCMDC2	0.0158615
ZNF32	0.931626
UCK1	0.931626
P3H3	0.931626
FOXK1	0.931626
TRIM28	0.0412164
PTPRF	2.03071e-12
FAU	0
UROS	0.671276
TSPAN14	0.931626
WDR61	0.583174
MED9	0.931626
DTX2	0.931626
GIMAP7	0.931626
PKM	3.7437e-05
ARHGDIA	0.436725
CDK5RAP3	0.931626
RIMS2	0.931626
CBWD3	0.0153595
ANP32E	0.931626
SRP54	0.931626
ASH1L	0.931626
TMED7	0.143238
MFSD3	0.931626
CDV3	0.0239291
ANP32B	0.0814428
GOLT1B	0.698308
EIF3C	0.647452
FBRSL1	0.931626
RSL1D1	0.0181101
MICA	0.931626
NAB2	0.931626
SCP2	0.450571
CLEC11A	0.931626
BEX4	0.931626
SLC35C2	0.581429
ITGB1	1.30009e-06
ARPC1B	6.49997e-07
DDOST	0.000434633
RFWD3	0.931626
DECR1	0.931626
ING4	0.931626
IQCB1	0.931626
TMEM167A	0.692452
PGK1	4.67377e-06
SLC35A2	0.505753
CCDC152	0.795122
RAP2B	0.931626
MZT1	0.931626
DUSP4	0.224119
HNRNPDL	0.0963743
TRIOBP	0.232714
ERGIC1	0.0817091
DNAJA4	0.931626
DEPTOR	0.931626
SMAD7	0.931626
MEF2C	0.931626
PSMD8	0
2023-03-06	0.176816
PRDM1	0.931626
PAXBP1	0.931626
[truncated: 6,436 more rows]

## Sheet: Supplementary Table 4
Supplementary Table 4: BSP results on hippocampus study using SeqFISH
GeneName	p_values
Tal1	0.0282152
Dmbx1	0.0313676
Emx2	0.0109852
Uncx	0.00072926
Paxip1	0.00175272
Ctnnb1	0.0574535
Prdm1	0.0220771
Rybp	0.00176189
Nfkb2	0.303088
Tfdp2	0.0146909
Grhl1	0.00896103
Sp8	0.0109852
Irf2	0.0577776
Zfp287	0.0109852
Esr2	0.00600066
Zfp128	0.0831805
Vav1	0.41288
Sp1	0.0146909
Ppargc1b	0.00142423
Sp7	0.00139495
Pin1	0.0255711
Nfya	0.0199764
Vsx1	0.00891881
Klf1	0.0142911
Vsx2	0.0352392
Mybl1	0.0812978
Mybl2	0.0114894
Rnf2	0.0164146
Blzf1	0.290711
Topors	0.0439544
Nr3c2	0.265576
Nfia	0.0447155
Taf6l	0.0574535
Nr4a3	0.119709
Hoxd12	0.0532738
Hoxd13	0.0639068
Ttf1	0.0135046
Sox9	0.00164288
Nr2e1	0.00241484
Polr2b	0.0189907
Hltf	0.290711
Sox6	0.00054836
Pbx3	0.00987302
Sox5	0.111848
Foxa1	0.264302
Cdc5l	0.00823784
Cebpg	0.0185272
Ciita	0.211664
Rest	0.0156326
Ets1	0.00072926
Mafk	0.0269287
Tbx15	0.143008
Scml2	0.0874111
Myb	0.211664
Clock	0.0971446
Rbpj	0.180579
Foxc1	0.0209539
Zfp422	0.00541911
Pias3	0.028276
Runx1	0.00164288
Ppara	0.0126187
Relb	0.00896103
Vdr	0.177131
Cdc6	0.00896103
Arid3a	0.00650898
Lhx1	0.0616364
Hoxb8	0.00295421
Hoxb9	0.00634576
Hic1	0.0261271
Lhx6	0.0133017
Six4	0.0154321
Hoxb3	0.00164288
Zfp263	0.0283093
Cbfa2t3	0.0114894
Ehf	0.00176866
Nhlh1	0.00987302
Gata6	0.00619584
Gata4	0.303088
Gata5	0.373531
Lpp	0.0518018
Nfe2l3	0.00072926
Nfe2l2	0.00596704
Tmf1	0.211664
Gli1	0.049556
Tbx2	0.0108001
En1	0.031903
En2	0.0333823
Hnf1a	0.108737
Tbx4	0.0195991
Zfp423	0.00164288
Elf1	0.248082
Foxb1	0.0346635
Elf2	0.00620326
Elf4	0.0310247
Mxd1	0.0160929
Wt1	0.0126187
Rfx4	0.00320858
Bhlhe41	0.00054836
Sox13	0.173133
Taf4b	0.00069122
Rfx2	0.0583777
Sox17	0.00862366
Ahr	0.0177101
Sall4	0.00202112
Med14	0.18077
Smyd1	0.116005
Sall3	0.0109852
Arid2	0.0192111
Zfp64	0.00655496
Pgr	0.00400447
Trps1	0.0551503
Hoxa1	0.220033
Bach2	0.0119968
Bach1	0.0179055
Notch3	0.00320858
Pknox1	0.373531
Pknox2	0.00910145
Sin3a	0.00054836
Etv3	0.00823784
Smad9	0.0111882
Smad5	0.0214775
Alx1	0.00202112
Egf	0.0146909
Mn1	0.0140218
Nkx3-1	0.543868
Rbak	0.0162393
Gabpa	0.0108001
Nfkbiz	0.0114753
Zscan21	0.00169367
Trp73	0.0624027
E2f7	0.110036
Esrrg	0.0254254
Rbpjl	0.00142423
Nfatc4	0.00532453
Nr5a1	0.132756
Neurod4	0.290711
Esrrb	0.340234
Tbx21	0.025883
Rorc	0.021628
Mitf	0.211664
Pax7	0.0021783
Pax6	0.0434396
Pax1	0.290711
Pax3	0.0454122
Pax2	0.0399019
Pax9	0.0113787
Zkscan17	0.0114894
Gfi1	0.047728
Mzf1	0.00619584
Runx3	0.00613044
Smarca4	0.169781
Foxd4	0.0831805
Foxd3	0.166039
Creb1	0.0412205
Srebf1	0.51746
Sox11	0.0318244
Gmeb2	0.0686147
Irx4	0.640867
Pou3f2	0.00600066
Ikzf1	0.0333823
Tcf23	0.122675
Mtf2	0.211664
Npas3	0.031317
Nfatc3	0.00054836
Nfil3	0.00091631
Phox2b	0.0177101
Plag1	0.00261739
E2f2	0.0133501
Ddx3x	0.00202112
Taf2	0.00620326
Pou4f1	0.00261739
Trim33	0.253692
Tsc2	0.00164288
Lmx1a	0.0111261
Nr2f2	0.0631581
Eomes	0.00823784
Wwtr1	0.0354975
Foxo1	0.0968626
Ar	0.00891881
Zfp354a	0.0164146
Elk4	0.00152472
Foxo4	0.00164288
Sall1	0.146502
Mycn	0.0176145
Maml3	0.00567939
Foxp3	0.0159775
Atm	0.0368807
Uaca	0.0108001
Tbr1	0.0909678
Pml	0.140419
Lhx3	0.00099436
Atr	0.128714
Zbtb33	0.166782
Ptch1	0.117201
Lhx5	0.00612027
Barhl1	0.0165768
Irx5	0.104014
Tfap2b	0.0133943
Tfap2e	0.211664
Rxra	0.115708
Rxrb	0.143546
Gli2	0.00295421
Gli3	0.00069122
Zic4	0.0111261
Zic5	0.0140218
Zic2	0.0333823
Zic3	0.00942637
Satb1	0.0366972
Onecut2	0.00118507
Foxn4	0.0192111
Mnat1	0.00400447
Foxn1	0.121308
Dlx2	0.169327
Vezf1	0.0631581
sncg	2.3e-06
sst	0.00261739
th	0.0537629
vip	0.675007
xdh	0.927895
slc17a8	0.00772591
slc5a7	0.0126187
slc6a3	0.202595
slc6a8	0.374091
smad3	0.927895
opalin	0.00640743
pdgfra	0.00338264
palvb	0.0602316
reln	0.415668
slc17a7	0.0652901
lyve	0.0146909
mfge8	0.0261271
mog	0.00594977
myl14	0.079866
ndnf	0.642462
ctss	0.00295421
foxj1	0.011642
gad1	0.0269
htr3a	0.1431
igtp	0.927895
acta2	0.00896103
alldh1l1	0.00840941
camk2	0.0574535
chat	0.675007
cldn5	0.927895
ngef	0.0111261
tiam1	0.0377547
slc1a2	0.0292052
gja1	0.927895
fbll1	0.927895

## Sheet: Supplementary Table 5
Supplementary Table 5: BSP results on hypothalamus preoptic regions study using MERFISH
GeneName	p_values
Ace2	0.880469
Adora2a	0.902094
Aldh1l1	0.215909
Amigo2	0.202809
Ano3	0.847565
Aqp4	1.32273e-05
Ar	0.00307099
Arhgap36	0.139773
Avpr1a	0.878037
Avpr2	0.902094
Baiap2	0.602774
Bdnf	0.470757
Blank_1	0.911794
Blank_2	0.940157
Blank_3	0.924485
Blank_4	0.95534
Blank_5	0.880469
Bmp7	0.753715
Brs3	0.793335
Calcr	0.470757
Cbln1	0.422332
Cbln2	0.0136864
Cckar	0.730995
Cckbr	0.518997
Ccnd2	0.224579
Cd24a	2.25173e-06
Cdkn1a	0.851431
Cenpe	0.851431
Chat	0.798922
Coch	0.685213
Col25a1	0.649577
Cplx3	0.880469
Cpne5	0.793335
Creb3l1	0.521383
Crhbp	0.851431
Crhr1	0.880469
Crhr2	0.869337
Cspg5	0.106319
Cxcl14	0.202809
Cyp19a1	0.869337
Cyp26a1	0.924723
Cyr61	0.276874
Dgkk	0.010735
Ebf3	0.482751
Egr2	0.877112
Ermn	3.97531e-06
Esr1	0.244707
Etv1	0.466787
Fbxw13	0.904144
Fezf1	0.685213
Fn1	0.276874
Fst	0.705313
Gabra1	0.00201236
Gabrg1	0.202809
Gad1	8.98927e-10
Galr1	0.809505
Galr2	0.869929
Gbx2	0.888602
Gda	0.000115169
Gem	0.818307
Gjc3	0.0813032
Glra3	0.0309235
Gpr165	0.0856477
Greb1	0.851431
Grpr	0.868535
Htr2c	0.0464268
Igf1r	0.470196
Igf2r	0.839406
Irs4	9.79612e-08
Isl1	0.801643
Kiss1r	0.869929
Klf4	0.6593
Krt90	0.896846
Lepr	0.880469
Lmod1	0.6593
Lpar1	0.215909
Man1a	0.518997
Mc4r	0.856105
Mki67	0.904806
Mlc1	0.00400974
Myh11	0.276874
Ndnf	0.818307
Ndrg1	0.000291157
Necab1	0.000252729
Nos1	0.104136
Npas1	0.847587
Npy1r	0.650323
Npy2r	0.215909
Ntng1	0.376785
Ntsr1	0.847587
Nup62cl	0.89559
Omp	0.793335
Onecut2	0.215909
Opalin	0.586866
Oprd1	0.776983
Oprk1	0.376785
Oprl1	0.139773
Oxtr	0.869929
Pak3	9.79612e-08
Pcdh11x	0.215909
Pdgfra	0.653065
Pgr	0.71106
Plin3	0.589432
Pnoc	0.653065
Pou3f2	0.292674
Prlr	0.000598475
Ramp3	0.851431
Rgs2	0.376785
Rgs5	0.170218
Rnd3	0.276874
Rxfp1	0.685213
Scgn	0.829543
Selplg	0.672614
Sema3c	0.315972
Sema4d	0.250293
Serpinb1b	0.786081
Serpine1	0.869929
Sgk1	0.00173506
Slc15a3	0.905696
Slc17a6	7.90686e-06
Slc17a7	0.888602
Slc17a8	0.965319
Slc18a2	0.64644
Slco1a4	0.276874
Sox4	0.395586
Sox6	0.406868
Sox8	0.513252
Sp9	0.793335
Synpr	0.376785
Syt2	0.376785
Syt4	0.016918
Sytl4	0.589432
Tacr1	0.533743
Tacr3	0.596718
Tiparp	0.403431
Tmem108	0.586866
Traf4	0.847587
Trhr	0.596718
Ttn	0.905696
Ttyh2	0.170218
Adcyap1	0.936667
Cartpt	0.999221
Cck	0.999221
Crh	0.999221
Fos	0.999221
Gal	0.978771
Gnrh1	0.999221
Mbp	0.869337
Nnat	0.880469
Nts	0.999221
Oxt	0.924485
Penk	0.992674
Scg2	0.902807
Sln	0.650323
Sst	0.999221
Tac1	0.953793
Tac2	0.999221
Th	0.999221
Trh	0.999221
Ucn3	0.999221
Vgf	0.924485

## Sheet: Supplemenatry Table 6
Supplementary Table 6: BSP results on Acute Kidney Injury (AKI) study using 10X Visium
GeneName	p_values
IGLC3	0
UMOD	0
IGLC2	0
JCHAIN	0
IGLC1	1.48668e-12
LTF	3.42762e-11
IGHA2	2.66894e-10
MT1G	2.72635e-09
ALDOB	3.61659e-09
MALAT1	3.61659e-09
IGHM	4.4606e-09
UGT2B7	1.14682e-08
IGHG2	1.79214e-08
SLC13A3	5.95448e-08
PTH1R	2.12418e-07
IGHG3	2.26944e-07
IGKC	4.44405e-07
FN1	5.79273e-07
LRP2	5.92122e-07
OLFM4	7.74644e-07
DEFB1	2.30606e-06
SPINK1	7.5161e-06
ANPEP	1.17742e-05
SLC12A3	1.33647e-05
RASSF4	1.33647e-05
APOE	1.39193e-05
MUC1	1.51671e-05
GPX3	1.56741e-05
MTRNR2L12	2.79082e-05
PODXL	3.32551e-05
MMP7	3.64153e-05
LCN2	5.02945e-05
SLC34A1	5.26871e-05
ASS1	5.9796e-05
NEAT1	6.89881e-05
POSTN	7.15449e-05
C1QA	0.000101716
SLPI	0.000103905
PTGDS	0.00010724
SLC22A12	0.000147977
ATP1B1	0.000156044
PLCG2	0.000200591
IGHA1	0.000200591
NAT8	0.000270953
NDUFV1	0.000275296
IGHG1	0.000325587
SLC5A12	0.000335542
KL	0.000366579
CLTRN	0.000437755
ALB	0.000437755
BBOX1	0.000437755
GATM	0.000451635
CFI	0.000543777
ENPEP	0.000566122
HLA-DPA1	0.000579126
AQP2	0.000585908
RPL23A	0.000585908
TACSTD2	0.000614753
RNF213	0.000614753
FAM151A	0.000678593
CCL2	0.00100453
PEPD	0.00122214
RPS25	0.00122214
RPL38	0.00126776
C1QB	0.00127089
RPS10	0.00131273
SLC5A2	0.00131546
SMIM24	0.00131546
MT1H	0.00139739
SERPINA3	0.0014517
LYZ	0.0014517
RPL27	0.0014517
RPL36A	0.00147963
SLC6A19	0.00150112
GDA	0.00152572
SLC16A9	0.00156187
COX6C	0.0015646
SAA1	0.0016481
CLU	0.00164913
C3	0.00166427
ITGB6	0.00170737
CCN2	0.00180261
KCNJ15	0.00188534
SLC12A1	0.00188534
RPS21	0.00213243
SLC4A4	0.00214132
VMP1	0.00214132
BHMT	0.00221597
CFB	0.00230368
IGFBP5	0.00239207
BHMT2	0.00244479
SDC1	0.00259583
TPP1	0.00298107
MME	0.00367968
S100A2	0.00370092
RPL23	0.00371249
SLC47A2	0.00386305
RPL37	0.00386769
KRT19	0.0039641
KHK	0.0039641
CXCL14	0.00397431
THY1	0.0041353
PDZK1IP1	0.0041353
MT1F	0.0041353
PRODH2	0.0041353
FXYD4	0.00425718
TMEM176B	0.00432412
MGST3	0.00498304
METTL7A	0.00554972
PIGR	0.00554972
AQP1	0.00623456
HADH	0.00640808
SUCLG1	0.00667419
ACSM2A	0.00668663
NPHS2	0.00685785
SLC22A6	0.00698968
STAB1	0.00720181
CUBN	0.00720181
HTRA1	0.00723903
JUND	0.00740634
TAGLN	0.00752321
ECHS1	0.00754653
SLC3A1	0.0075994
IFI30	0.00774208
SLC25A5	0.00774553
GAS5	0.00774553
CDH16	0.0080715
SNHG5	0.00837723
PAX8	0.00903758
BTF3	0.00907478
RPL24	0.00931977
EGFL7	0.00947984
ACTA2	0.00950745
CRIP1	0.00990013
OST4	0.00990013
COL1A2	0.00990013
SHMT1	0.00990013
FAU	0.00990013
IGFBP2	0.0100383
COX6B1	0.0100383
C12orf57	0.0100383
CRYAB	0.0105182
TRMT112	0.0107377
RPL31	0.0107377
CA2	0.0111599
ROMO1	0.0111599
TRBC2	0.0111599
IFI27	0.011278
C1QC	0.0113944
PRSS23	0.012327
NAP1L1	0.0124138
GRN	0.0126264
SLC22A8	0.0126264
CCDC80	0.0129898
COL1A1	0.0135833
PGRMC1	0.0140464
GHITM	0.0148741
ACSM2B	0.0149746
CLIC5	0.0149746
RPL30	0.0149746
RPS26	0.0149746
MIOX	0.0151425
KRT18	0.0152001
COX7A2	0.0157907
GALNT11	0.0163859
COMMD6	0.0165409
HSPE1	0.0168027
IVNS1ABP	0.016855
TYMP	0.0172241
RPL37A	0.0172241
MZB1	0.0175214
VIM	0.0182046
COL3A1	0.0182837
THBS2	0.0199237
RHOB	0.0199237
RGS5	0.0199471
SLC13A1	0.0208941
TGFBR2	0.0209175
STAT1	0.0209785
SOD2	0.0209785
NPNT	0.02143
KRT8	0.0216247
CMBL	0.0226594
RBX1	0.0228347
AMACR	0.0228347
CTSA	0.0228347
FCGR3A	0.0228347
ATP5F1C	0.0237228
NDUFA1	0.0239809
AK4	0.0242192
ATP6V0B	0.0243587
RASD1	0.0248323
LAPTM5	0.0249693
SLC7A8	0.0255475
TAPBP	0.0255475
NOX4	0.0255475
AOC1	0.0258209
ATP5MC3	0.0259231
CNDP2	0.0262861
RPL34	0.0262861
TPM2	0.0264544
PLTP	0.0265705
HIGD2A	0.0265705
COX7B	0.0265705
EEF1B2	0.0265705
FAM20A	0.0265705
APOC1	0.0265705
SPP1	0.026582
HLA-DQB1	0.0267781
SRSF2	0.0267781
SBNO2	0.0267781
SERPINF1	0.0277996
ADAMTS9-AS1	0.0278221
UNC5CL	0.0287396
CCNL2	0.0292396
EMC10	0.0294938
SFRP1	0.0304016
FCGRT	0.0304016
C7	0.0304016
CTSH	0.031656
S100A4	0.031656
GTF2I	0.031656
STAT2	0.031656
SPG7	0.031656
RPS29	0.031656
CKB	0.0318663
CTSC	0.0318663
ANK2	0.0320384
TGM2	0.0321311
WDR6	0.0321311
IDH2	0.0323757
ATP5PO	0.0332451
C4orf3	0.0335872
HNRNPH1	0.0345292
TIMP3	0.0347436
GSN	0.0350395
TMA7	0.0350395
CYB5A	0.0361688
ATP5F1D	0.0370332
FXYD2	0.0373654
RABAC1	0.0376017
HLA-DMB	0.0383482
LAMB2	0.0393668
CDC42	0.0395443
ATP5MPL	0.0395443
PCSK1N	0.0399245
NDUFB1	0.0399245
CLDN2	0.0399357
PLXNB1	0.0400467
TOMM7	0.0400846
MRFAP1	0.0405728
CGNL1	0.0406213
PAH	0.0407395
PDZK1	0.0410186
AMN	0.0410186
CYCS	0.0410186
CALD1	0.0410186
RPL10A	0.0410186
RPL26	0.0410186
ARHGDIB	0.0418941
UQCRQ	0.0421764
PCK1	0.0421764
PSME2	0.0422205
INTS1	0.0422205
RPS24	0.0422205
YWHAQ	0.042621
COX6A1	0.042621
ATP5PB	0.0429729
CD99	0.0437317
CIB1	0.0437317
XRCC6	0.0448843
CAPZB	0.0458616
MGST1	0.0459147
SCAND1	0.0459147
MRPL41	0.0459147
RAB11FIP3	0.0470948
OGDHL	0.0471201
THBS1	0.0472565
GUK1	0.0472565
UQCRC1	0.0475779
XBP1	0.0487704
CA12	0.0487802
TNFRSF14	0.0489994
MUC20	0.0499197
ACAT1	0.0499197
WDR1	0.0510792
MT1X	0.0511209
AP3D1	0.0513721
SERPINA1	0.0513721
EPCAM	0.0528441
CNBP	0.0535161
ITGB2	0.0545093
PLPP3	0.0546616
ITGA3	0.0548624
TMEM176A	0.0548624
NORAD	0.0548624
PRELID1	0.0548624
HNRNPAB	0.0548624
MYO15B	0.0548624
RIDA	0.0548624
LAMA5	0.0548624
NCOA7	0.0548624
ADGRG1	0.0548624
FOLR1	0.0548624
DDAH1	0.0549559
NOP10	0.0550394
EFEMP1	0.0550394
HLA-DMA	0.0550394
CAPG	0.055636
PBLD	0.0558517
MDH1	0.0558675
REEP5	0.0568406
MRPL33	0.0569693
INSR	0.0581407
EDF1	0.0587745
ALDH1A1	0.0587745
LTB	0.0587745
SDC4	0.0587745
CD52	0.0593164
AZGP1	0.0593164
EZR	0.0599859
NFASC	0.0600748
HMGN3	0.0602347
NBR1	0.060619
SYNGR2	0.0615981
PHB	0.0619103
NDUFS3	0.0623791
BTG2	0.0624639
MAOA	0.0626837
LUM	0.0630665
VCAM1	0.0631474
SDF4	0.0631474
SPOCK2	0.0631474
EIF5A	0.0649102
DPEP1	0.0649213
PSMB4	0.0652135
ISCU	0.0652557
CYSTM1	0.0655761
GNB1	0.0657348
ADIRF	0.0658418
UQCRB	0.0658418
MFSD12	0.0671744
SELENOF	0.0675623
HIF1A	0.0679222
NAA38	0.0679222
PCP4	0.0679222
TMBIM4	0.0681616
WFDC2	0.0694448
NAPA	0.0698832
VCAN	0.0701504
COL6A1	0.0701504
SRSF11	0.0701504
PSMA4	0.0701504
BSG	0.0701504
AGPAT3	0.0701504
LGALS1	0.070478
OS9	0.070478
ARPC4	0.070478
MZT2B	0.070478
APLP2	0.070478
RPS27A	0.070478
TINAGL1	0.070794
TPM1	0.0711571
TNFRSF1A	0.0714467
CYBA	0.0716147
RBM25	0.0719606
SMPD1	0.072062
CD24	0.072062
YWHAE	0.0736679
CYS1	0.0739984
LAMP2	0.0739984
YBX1	0.0739984
DYNLL1	0.0750562
LITAF	0.0754442
TSPAN1	0.0754442
FLNA	0.0754442
MXRA8	0.0757502
NTN4	0.0759509
RPS15A	0.0764679
EVA1B	0.077184
EIF4G1	0.0775523
UQCR11	0.0775523
CYC1	0.0778349
PGAM1	0.0781148
PFKL	0.078919
VWF	0.078919
EHHADH	0.078919
ACAA1	0.0792468
ATP5ME	0.0794013
HLA-DPB1	0.0803275
NDUFS5	0.0803275
ARHGAP1	0.0804785
RHBDD2	0.0809506
HS6ST1	0.0809506
PDGFRB	0.0813926
CAPN2	0.0815939
SH3BGRL	0.0815939
PSMC6	0.0815939
SLC6A13	0.0821513
GRK2	0.0829138
COPS9	0.0832128
DDR1	0.0836824
TNC	0.083706
KCNJ16	0.0845247
TSPYL1	0.0845247
SNU13	0.0847999
ATP5MG	0.0847999
CYP1B1	0.0847999
ACADVL	0.0847999
ARPC3	0.0848572
TOMM6	0.0848572
STUB1	0.084872
SH3GLB2	0.0851561
PLVAP	0.0858535
EWSR1	0.0858535
EMCN	0.0859223
TSC22D1	0.0859223
IL32	0.0859223
DUSP23	0.0859223
TAGLN2	0.0859223
RPL22	0.0859223
ARL2	0.0859223
NDUFA4	0.0859223
CDK10	0.0859223
POLR2H	0.0859223
PDLIM5	0.0862114
ZMIZ2	0.0871348
NFE2L1	0.0871656
GPRC5C	0.0871656
MLEC	0.0871656
SDHA	0.0871656
DDX17	0.0871656
PSMC5	0.0875399
RAB5B	0.0875399
PNPLA2	0.0875958
FAM120A	0.0888112
RAP1B	0.0893474
COX7A1	0.0893474
SLC9A3R1	0.0893474
RBM5	0.0893474
ACSS2	0.0906699
ANXA11	0.0909381
H2AFV	0.0910067
ARRDC3	0.0910067
RNASE1	0.0914794
POLDIP2	0.0920888
NARS	0.092243
SPCS3	0.09253
SPARC	0.09253
SRP14	0.0926811
ATP5F1A	0.0926833
MAP4	0.0927496
PILRB	0.0936298
CD44	0.0943341
PPDPF	0.0947046
MARCKS	0.0947046
IL17RB	0.0947046
PNISR	0.0947046
CTSD	0.0974901
TSPAN3	0.0976555
SEM1	0.0979068
MAL	0.0979885
RBM3	0.0979885
C11orf54	0.0979885
NDUFC1	0.0979885
LRPAP1	0.0979885
PTP4A2	0.0979885
TMEM52B	0.0979885
DHRS7	0.0979885
HPN	0.0979885
TMEM14C	0.0979885
CIITA	0.0984496
MAPKAPK2	0.0993457
COL6A3	0.100122
GNG11	0.100122
FOSL2	0.100122
SNHG32	0.100922
RPL32	0.101018
RPS15	0.102027
ELF3	0.10206
MICOS10	0.10206
GPNMB	0.10206
JADE1	0.10206
NHP2	0.102149
ENG	0.102578
ASAH1	0.102585
SNRNP70	0.102585
ATP1A1	0.102585
DDC	0.102585
PACSIN2	0.102585
FABP4	0.102585
RPL12	0.102585
DPM3	0.102842
DDX3X	0.103246
CD9	0.103561
MYL12A	0.103561
TNFRSF12A	0.104314
MAGED1	0.104837
SLC7A7	0.104837
UBE2H	0.104837
GOLGA8B	0.104837
DNAJC11	0.105175
HNRNPM	0.105341
CTTN	0.105341
HOPX	0.105402
RPS23	0.105402
NDUFB9	0.105864
IFNGR2	0.105864
BRK1	0.105864
EHBP1L1	0.105864
GLYAT	0.105864
CD68	0.105864
RELA	0.105864
TUFM	0.106019
CXCL12	0.106019
PPFIBP1	0.106439
MRPL34	0.106439
ADAMTS1	0.106661
HLA-DQA1	0.106661
HSPB1	0.106661
CLIC1	0.106703
FAM20C	0.107547
PEBP1	0.107572
HNRNPA2B1	0.107644
RPS7	0.107644
RPL11	0.107644
DDX5	0.107722
ACSL4	0.108201
PPP2R1A	0.108201
SELENOW	0.108433
ANK3	0.108632
CCL21	0.108661
IER3	0.108661
FCER1G	0.108661
ITFG1	0.108661
OCIAD2	0.108661
UBA1	0.108661
KIF5B	0.108661
HSPA8	0.108661
NISCH	0.108661
COQ9	0.108661
RABL6	0.108661
ATP6V0C	0.108661
RPL39	0.108987
ACO2	0.109331
MYH9	0.109379
EEF1D	0.109379
ATP5PD	0.110362
HNRNPF	0.110362
SSR2	0.110525
LAP3	0.110525
BLOC1S1	0.110525
NDUFA5	0.110792
CRIP2	0.111081
KRT7	0.111576
CALB1	0.111814
TMEM258	0.111814
WNK1	0.111814
ATP5MD	0.111814
NID1	0.111814
LCP1	0.111814
GRHPR	0.111814
CTSB	0.111814
DBI	0.112073
VWA1	0.112188
OGT	0.112188
FGF1	0.112188
ACAD10	0.112263
TUBA1A	0.112667
NSA2	0.112667
DMAC1	0.112667
PROM1	0.112667
CCT4	0.112667
SNRPD2	0.112836
SCPEP1	0.113124
FKBP1A	0.113266
RPL36AL	0.113557
FUS	0.11468
ST6GAL1	0.115225
ZMIZ1	0.116615
ELOB	0.117189
CLDN4	0.117189
PDLIM7	0.117189
COX7C	0.117189
ZFP36L2	0.117438
MRPL12	0.117438
NAPSA	0.117438
KDELR2	0.117676
EPAS1	0.11781
FXYD5	0.11781
RNH1	0.118017
NONO	0.118017
HNRNPD	0.118017
RAP1A	0.118544
LTBP3	0.120199
LDHB	0.12022
DDT	0.120776
UQCC2	0.120776
COX5A	0.121285
NR2F2	0.121523
HSPD1	0.121636
SERPINH1	0.121677
SRP9	0.121677
SPTBN1	0.121677
SLC39A7	0.121677
NDUFA10	0.121885
LLGL2	0.121885
VCL	0.122441
STOM	0.122851
NRP1	0.122865
RAN	0.122921
COL4A2	0.122921
PARP10	0.122921
ACY1	0.123431
RTN4	0.123759
MRPL20	0.124686
HNRNPL	0.124798
CPVL	0.125154
PLPP1	0.125619
RHOC	0.12606
BIN1	0.12606
NIPSNAP2	0.126266
HABP2	0.126266
IL6ST	0.126835
NDUFB7	0.126835
LAMB1	0.126835
EIF3F	0.126835
LHFPL6	0.126835
PLA2R1	0.126835
RBCK1	0.126835
RPL17	0.126835
ST13	0.127153
COX8A	0.127153
GAS6	0.127777
NNMT	0.127899
PET100	0.128625
DSTN	0.128625
WSB1	0.128625
NDUFAB1	0.128625
ACTN1	0.128625
TFCP2L1	0.128625
NFKBIZ	0.128625
WTAP	0.128625
NAXE	0.128625
SNX3	0.12928
SAT1	0.130482
YBX3	0.130862
NPC2	0.131073
TPI1	0.131073
LAMTOR5	0.131197
YWHAH	0.132084
AP2M1	0.132084
WWTR1	0.132084
UBE2G2	0.132084
UBXN6	0.132084
ARHGEF10L	0.132084
RSRP1	0.132084
AFDN	0.132084
CD151	0.132514
TMEM219	0.133119
IDS	0.133119
PLAAT4	0.134097
PRPF8	0.134097
VEGFA	0.134493
NDUFA6	0.135107
MAF	0.135858
ECI1	0.135858
TMX2	0.136033
GNS	0.136087
TRIP12	0.136365
FBLN5	0.136371
TCN2	0.136547
POU3F3	0.136585
SUB1	0.136597
NES	0.136597
SLC25A4	0.13787
HDGF	0.138519
MYL9	0.138519
PYGB	0.138519
HPD	0.138547
MMP24OS	0.138717
SOD1	0.13911
GLRX	0.13911
PHPT1	0.13911
CALM2	0.13911
SEPTIN11	0.13911
RPL27A	0.13911
SLC3A2	0.139896
SYPL1	0.139896
GOT2	0.139896
TCIM	0.139896
FABP3	0.139896
RPS18	0.139896
NPM1	0.1399
TMEM37	0.140047
ALDH6A1	0.140386
NFKBIA	0.140807
CEBPD	0.140878
SPARCL1	0.14134
SLC2A4RG	0.14134
PSME1	0.141503
VAMP8	0.141738
ID3	0.142624
BCL3	0.142624
ETS2	0.143351
TMED9	0.143507
S100A10	0.143507
BCAP31	0.143507
RBM47	0.143507
HNRNPU	0.143838
MTFR1L	0.143838
METTL9	0.144014
COL15A1	0.144193
RAB11B	0.144193
NUMA1	0.144193
GLUL	0.144222
SLC5A10	0.144222
TRAM1	0.144706
SF3B6	0.144706
UBL5	0.144706
ERP29	0.145682
NDUFC2	0.14573
PAM	0.14627
KTN1	0.14627
CHCHD2	0.147734
RTL8C	0.147734
FDPS	0.147734
CBX6	0.148831
NAGK	0.149521
CELF1	0.149521
DAB2	0.1498
HMGB1	0.150109
BEX3	0.150109
MRPL51	0.150109
KCTD12	0.150109
CDV3	0.150109
ATP6V1B2	0.150109
MAN2C1	0.150109
SYNE2	0.150398
RHOT2	0.151883
CERS2	0.152126
MAN2B1	0.152126
ANP32B	0.152126
HINT1	0.153722
RCAN1	0.153722
SEC11C	0.153722
KIFC3	0.154328
NME2	0.154342
EID1	0.154411
LTBP4	0.154411
NDUFB2	0.155255
HLA-DRB1	0.155255
PABPC1	0.155412
BCAR1	0.155641
PLAT	0.155798
CD14	0.156173
ACAA2	0.156173
HSPG2	0.156173
FBLN1	0.156173
NUCKS1	0.156173
SERPINA5	0.156173
HSD11B2	0.156173
IGFBP4	0.156173
PRKAR1A	0.156173
DCXR	0.156173
PRDX1	0.156173
OCIAD1	0.156173
ATP6V0A1	0.156173
NCF1	0.156173
SPOCK1	0.156173
TMOD3	0.156173
EIF1	0.156173
RPS11	0.156173
PIGT	0.157055
TKT	0.157055
SUMO1	0.157055
AKR1B1	0.157118
EHD2	0.157118
NUCB1	0.157275
RAC1	0.157308
IFITM1	0.158128
UQCRFS1	0.158304
AIG1	0.158304
STK11	0.158304
IGHGP	0.158494
CHCHD10	0.159042
ETFB	0.159042
UGCG	0.160105
CENPB	0.160105
ADI1	0.160123
SPINT2	0.160615
WBP2	0.160615
DHCR24	0.160615
HDAC7	0.160615
CTNND1	0.160665
NXF1	0.160765
ZFP36L1	0.161679
SLCO2B1	0.161679
ITGA2	0.161679
SUPT6H	0.161845
MLLT6	0.162162
RPS6	0.163332
FAM50A	0.163425
PSMD2	0.163942
CYB5R3	0.16637
C11orf96	0.166891
CLTA	0.166891
MICOS13	0.167367
TALDO1	0.167372
AP1B1	0.16795
PICALM	0.16801
MGLL	0.16801
JUNB	0.16801
NAMPT	0.16801
OTUB1	0.16801
PGPEP1	0.16801
SLC25A39	0.168791
MGAT1	0.168791
CALM1	0.16922
BRI3	0.169476
CHTOP	0.169476
REXO2	0.169644
ITM2C	0.170254
WWC1	0.170254
SH3GLB1	0.170254
GSTP1	0.170254
CYP4V2	0.170254
IP6K2	0.170453
KNG1	0.170453
SLC44A2	0.170522
TST	0.170522
BTG1	0.170522
KCNJ1	0.170522
SGK1	0.170522
CRK	0.170522
ANXA2	0.171135
RBM6	0.171171
KIF1C	0.171189
SSR4	0.171191
GOLM1	0.171434
DCAF7	0.171434
RNF187	0.173013
SERP1	0.174268
RARRES2	0.174451
MYH11	0.174451
MPC2	0.17475
SLC6A8	0.17475
SURF4	0.17495
TRIR	0.17495
ACLY	0.17495
CLTC	0.175582
DYNLL2	0.175582
GPI	0.175582
MACF1	0.175582
NDUFS2	0.175582
UQCRC2	0.175582
SCAMP2	0.175582
SHC1	0.175582
MRPS7	0.176091
KLC1	0.176091
TTC38	0.17731
WASF2	0.17731
MAT2A	0.177831
CIRBP	0.178081
ACTN4	0.178984
CRIM1	0.179564
VASN	0.179564
NDUFA12	0.179634
FURIN	0.179634
SRSF9	0.179848
NDUFA3	0.180133
BCAM	0.180488
EIF4EBP2	0.180488
SPINT1	0.180878
LRRC32	0.180878
SRSF1	0.181176
COLGALT1	0.181329
H3F3A	0.182043
KIF22	0.182043
IMPDH2	0.182302
LGMN	0.182304
SELENOP	0.182304
POLR2J	0.182304
FLNB	0.182686
LAMTOR2	0.182686
FNBP1L	0.182686
TPD52L2	0.184396
MYLK	0.184406
BST2	0.184766
DAD1	0.185436
MS4A6A	0.185436
ATL3	0.185436
CABIN1	0.185436
GIPC1	0.185436
NR2F1	0.185915
MRPS6	0.185915
H2AFY	0.186502
H2AFZ	0.186821
TM9SF2	0.186821
NDUFA2	0.186821
TMEM109	0.186821
SEC61B	0.186821
APEH	0.186821
PTPRC	0.186821
NPLOC4	0.186821
ABCF1	0.186821
RSRC2	0.187005
RAMP3	0.188211
ARF6	0.188211
CHCHD1	0.188211
SLC12A7	0.188211
NPR3	0.188248
CHMP3	0.188298
H19	0.188298
HIGD1A	0.188305
ABLIM1	0.188305
TAF15	0.188305
HMGCL	0.188505
TEX264	0.188505
ATN1	0.188783
SLC6A12	0.190081
BAG1	0.190783
RAPGEF3	0.190994
ARHGEF7	0.191389
MAOB	0.191441
TXNDC17	0.191917
PECAM1	0.191923
PTEN	0.192476
NDUFA13	0.193114
SERINC1	0.193497
NDFIP1	0.193497
RPL14	0.193515
IFI6	0.193978
PLXDC2	0.194524
TMEM50B	0.194524
EIF4B	0.19481
TRIM28	0.19481
RPL4	0.194926
LRP10	0.194983
CDK2AP2	0.194983
TBX2	0.194983
ZFAND6	0.194983
ACSF2	0.194983
RANBP2	0.194983
MBTPS1	0.195086
PFN1	0.195192
HIPK2	0.195254
LUC7L3	0.195254
ARAF	0.195254
SLC38A10	0.195364
WDR61	0.195364
GANAB	0.195624
SIPA1	0.195624
GDF15	0.195985
CDKN1C	0.197405
EPS8L2	0.197973
S100A13	0.197973
LSM4	0.197973
CCDC12	0.197973
SCP2	0.198379
RPN1	0.198708
HADHA	0.199121
ANAPC11	0.199282
PUM2	0.200507
SH3BP2	0.200619
PPP1CA	0.201282
GSTO1	0.201282
SNHG29	0.201822
PCBP1	0.201822
ST6GALNAC6	0.201822
CHPF	0.202622
ZEB2	0.20266
PALLD	0.20402
TXNDC5	0.20402
SCARB2	0.20402
SFPQ	0.204541
CTSL	0.204541
RPL21	0.204541
SNRPC	0.204542
CCNDBP1	0.204542
PITPNM1	0.204771
LAMTOR1	0.205079
BAG6	0.205079
TNFSF13	0.205079
HLA-DRA	0.205079
MOB1A	0.205149
SNRPF	0.205149
RBM42	0.205641
NUPR1	0.205681
EML4	0.205681
APOL2	0.206317
FTCD	0.206317
RPL5	0.206923
PCBD1	0.20703
TMBIM6	0.20703
MIA2	0.20703
AKAP8L	0.20714
CDH6	0.207148
HMGN1	0.207474
HDAC1	0.207474
OGFRL1	0.207474
SCAF11	0.207474
FBXW5	0.207828
AK3	0.208403
SDHB	0.208429
POMP	0.208575
ICAM1	0.208575
ALDH1L1	0.208575
GLS	0.209093
HK1	0.209093
RPL41	0.209156
NENF	0.209339
PLXND1	0.209701
RPL18	0.209701
CIAO2A	0.209701
SLC38A2	0.210527
AHNAK	0.210922
BDH2	0.211156
NDUFB3	0.211156
HSP90AA1	0.211156
GM2A	0.211156
ZDHHC5	0.211487
FSTL1	0.211491
ARHGDIA	0.211491
PPP1R14A	0.211491
CAP1	0.212027
NDUFS7	0.212027
GADD45B	0.212144
VPS51	0.212144
C1S	0.212178
DCN	0.212583
TNFSF10	0.212904
SOCS3	0.212956
PDHA1	0.212966
RAB7A	0.212966
VOPP1	0.212966
ARFRP1	0.212966
PLEKHA1	0.212966
PCED1A	0.212966
RBM14	0.212966
CHMP1B	0.212966
AK2	0.214009
RCN1	0.214243
MRPS21	0.214243
CIAO2B	0.214243
TOMM20	0.214243
SEC31A	0.214867
ANKRD10	0.214907
TFE3	0.214907
VAPA	0.215737
ATP6V1H	0.216836
GSR	0.216873
TAX1BP1	0.217025
EEF1G	0.217348
SNHG16	0.217348
PDIA6	0.217693
ATP6V0E1	0.217693
SAR1A	0.217693
PNRC1	0.217693
RHEB	0.217693
LMBRD1	0.217693
SERINC2	0.217693
COX20	0.217693
MFF	0.217693
SLC25A29	0.217693
MAPK8IP3	0.217693
SARAF	0.218207
MGAT4B	0.218207
YWHAB	0.218447
RPL15	0.218447
DBNL	0.219329
VTCN1	0.219448
SELENOH	0.219588
TRAPPC1	0.219617
NKAIN4	0.220591
RPS4X	0.22105
PRAP1	0.22105
PXN	0.221217
AGTRAP	0.221467
PPP1R1A	0.221714
CLSTN2	0.221962
EFHD1	0.221962
ERBB2	0.221962
APMAP	0.221962
PPP6R1	0.221962
ENTPD6	0.221962
EEF2	0.221962
MCRIP1	0.222353
CBR1	0.222544
ACTR2	0.22268
SARS	0.22268
TPCN1	0.222975
SHISA5	0.223013
CDK5RAP3	0.223013
ATP6V1G1	0.22318
SLC47A1	0.22318
LAMP1	0.22318
EIF3E	0.223268
IER3IP1	0.223529
GAK	0.223976
JAK1	0.224246
TMSB4X	0.224672
NDUFV2	0.224737
TXLNA	0.224737
GPAA1	0.224737
ECH1	0.224737
RPS27	0.224737
IFFO1	0.224758
PRPF4B	0.224791
DNAJB11	0.2254
ZFAND5	0.225571
AURKAIP1	0.225571
LENG8	0.225571
APP	0.225571
PAPLN	0.225571
ATP6V1C1	0.225571
LINC01503	0.225571
TUSC3	0.225571
RPL28	0.225571
SQSTM1	0.226699
RBP5	0.226699
NPDC1	0.226699
AP2S1	0.227756
CLDN10	0.227938
AKAP9	0.228345
SNX2	0.229303
RPS3A	0.229454
CHKB	0.229616
RTCB	0.22999
PLXNB2	0.230311
RRBP1	0.230311
TLN1	0.230311
VCP	0.230311
KRT10	0.230311
RNF10	0.230311
SLC36A2	0.230311
SNX17	0.230311
SLC48A1	0.230311
TERF2IP	0.230311
MAEA	0.230311
TIMP1	0.230372
ABHD12	0.231142
TNFAIP2	0.231297
SF1	0.231297
PSMB7	0.231297
NOTCH3	0.231671
ANXA4	0.231671
TCP1	0.231671
AIF1	0.231903
SERPINB6	0.231978
HNRNPH3	0.231978
ADRM1	0.231978
NDUFB10	0.232136
POLR2L	0.232236
ARPC1B	0.232627
MORF4L1	0.232758
TNS1	0.232758
RNF5	0.232758
CDHR5	0.232758
MSN	0.233368
RAB11A	0.233368
MTRNR2L8	0.233368
ARL6IP4	0.233368
TRIM8	0.233368
AKAP12	0.233368
HSP90AB1	0.233368
PABPN1	0.233368
ABCC6	0.234907
TMED2	0.234956
PPCS	0.234956
TGFBI	0.234956
RPS5	0.234956
EGLN2	0.234956
MRPL17	0.23543
LRP1	0.235707
SLIRP	0.235891
CCNI	0.236477
ADD1	0.236534
MBOAT7	0.236854
PRRC2B	0.236854
GPS1	0.236854
RNF152	0.236854
TMEM8A	0.236988
PIEZO1	0.237047
UBE2Z	0.237047
MRPS24	0.237047
MEA1	0.237047
TSPAN33	0.237185
JAG1	0.237997
SEMA3B	0.237997
ESYT2	0.238402
CYFIP2	0.238402
TMEM106C	0.238402
RPS17	0.238402
GDI1	0.238653
POR	0.238708
SMARCA5	0.239046
RERE	0.239264
LEPROT	0.239264
COL8A1	0.239264
TM7SF3	0.239264
PLS3	0.239264
IPO7	0.239264
LINC01320	0.239264
PPIA	0.239264
LRATD2	0.239537
SMS	0.239537
PPP1R16A	0.239537
APRT	0.239878
NPTN	0.240011
SLC37A4	0.240027
PNN	0.240277
DYNC1LI2	0.240459
ARPC2	0.240961
PLD3	0.241086
FLOT1	0.241306
GPC4	0.242355
HEXB	0.243216
NAGLU	0.24364
AIF1L	0.243728
NDUFB4	0.243728
SRGN	0.243728
RHOA	0.243728
RPS3	0.243728
ACAP3	0.243728
CLCNKB	0.243883
OAZ2	0.245567
SEC61A1	0.245741
TMED5	0.245741
PARP14	0.245741
JTB	0.245755
TNS3	0.245985
HDLBP	0.246268
FKBP3	0.246498
CXXC5	0.246662
CLPTM1L	0.247829
MFGE8	0.247829
SLC35F5	0.247829
MVP	0.247829
IL13RA1	0.247829
UBTF	0.247829
HIP1R	0.247829
FRZB	0.247829
PRPF31	0.247829
RIPOR1	0.248016
SLC6A6	0.248016
RGL2	0.248151
CPEB4	0.248199
SUSD2	0.249221
PEA15	0.249468
CRYZ	0.249468
DECR1	0.249468
PRXL2A	0.249468
SYTL2	0.249468
RPL10	0.249468
ARAP1	0.250339
SF3B5	0.250415
NAP1L4	0.250893
COL16A1	0.250893
ALDH2	0.251293
PNRC2	0.251293
PSMD8	0.251293
CHID1	0.251293
ACP1	0.251293
ESD	0.251293
GRB2	0.251347
HDHD3	0.251983
PNPO	0.252473
AGMAT	0.254427
RPN2	0.254468
NEU1	0.254941
DST	0.254941
UBE2Q1	0.254992
CLK2	0.255031
IL4R	0.255051
PTPRF	0.256109
UQCR10	0.256585
KLHDC2	0.256585
COQ4	0.256585
IGFBP3	0.256585
MFAP4	0.256654
ATP5PF	0.256692
EIF6	0.256692
CORO1A	0.256692
SLC39A5	0.256692
HIBCH	0.25673
PON2	0.25688
DGCR2	0.256919
CTSZ	0.257029
BTBD2	0.257029
EGLN1	0.257029
YIPF3	0.25738
STK25	0.258651
HMG20B	0.258829
JUP	0.259239
BRD2	0.259239
LDHA	0.259239
DCTN2	0.259239
HNRNPUL1	0.259239
CAMTA1	0.259239
SLC17A3	0.259239
FAM107B	0.259854
LGALS2	0.259879
CDC42EP1	0.259879
LST1	0.259879
CSTB	0.260066
ALKBH7	0.260066
HMGN2	0.260502
LSM3	0.260615
LRRC59	0.260615
AC005261.1	0.260977
ERGIC3	0.261188
NELFB	0.261188
ISOC2	0.261399
CAPRIN1	0.261564
C1orf198	0.261564
RALY	0.261913
TMEM131	0.261913
UBE2L3	0.262409
HSPH1	0.262469
C4orf48	0.26268
ATRX	0.26268
AHCYL1	0.262861
TCF25	0.262861
LMAN2	0.264002
MCL1	0.264002
ILF2	0.264016
RACK1	0.264079
R3HDM4	0.264274
CXCL16	0.264274
ICMT	0.26431
COPB1	0.26431
CIAPIN1	0.26431
PARK7	0.264589
OGDH	0.264589
COA3	0.264589
AFF1	0.264589
ITGA6	0.264589
ISLR	0.264589
ZNF664	0.264589
NME4	0.264589
FMO1	0.264589
EFCAB14	0.264589
RPS6KA1	0.264589
MCCC2	0.264589
BORCS7	0.264589
AEBP1	0.265477
PPP1CB	0.265477
NIBAN2	0.265477
TRIM2	0.265477
TBC1D16	0.265477
RBPMS	0.265549
RPS27L	0.265549
TUBA1C	0.266171
XRCC5	0.266171
NLRC5	0.266332
EIF2S3	0.266993
NAPRT	0.266993
RHOG	0.266997
GGT5	0.267146
PCOLCE	0.267146
TIMP2	0.267146
SZRD1	0.267146
CDIPT	0.267146
PSMD1	0.267146
CCNL1	0.267146
ASPH	0.267146
CYBC1	0.267146
STXBP2	0.267146
NCOR2	0.267146
SEMA4B	0.267146
MRPL57	0.267344
SEPHS2	0.267415
ADD3	0.267439
SEPTIN2	0.26754
LTBR	0.26754
USP34	0.267697
RPL18A	0.267697
HNRNPA3	0.268289
LGALS3	0.268289
SLCO2A1	0.268289
CSNK1A1	0.268289
CD47	0.268289
PSAT1	0.268289
CRISPLD2	0.268289
GUSB	0.268462
RAB29	0.268649
COL5A1	0.268874
LIMD2	0.268874
ARF3	0.269134
PRDX3	0.269179
ABCC5	0.269179
PSMD13	0.269336
LSP1	0.269749
PNP	0.269749
PGLS	0.270319
CREG1	0.27079
CHD3	0.27079
MYH10	0.27079
TBCD	0.27079
DDX42	0.271004
ZNHIT1	0.271571
CUX1	0.27372
KIAA1191	0.273844
STAT6	0.273844
SYF2	0.273844
SLC35C2	0.273844
DAB2IP	0.273844
SPATS2L	0.274008
EVL	0.274267
EPB41L1	0.274267
CD93	0.274449
GRSF1	0.274698
DYNC1H1	0.275486
CAST	0.275486
IDH3G	0.275486
AGT	0.275688
ECHDC2	0.276484
DCDC2	0.277152
TBCB	0.277359
C12orf75	0.277466
SEMA4D	0.277466
DUS1L	0.277466
SVEP1	0.277466
S100A9	0.277466
GYPC	0.277466
RPS16	0.277466
P4HB	0.277972
COX7A2L	0.278275
SSBP3	0.278421
SNRPG	0.279048
PHC2	0.279048
STARD7	0.279048
SNHG25	0.279048
SF3B2	0.279048
ACOT7	0.279048
RTRAF	0.279048
CPNE3	0.279048
GPBP1L1	0.279048
CLCN5	0.279048
HGD	0.279077
SELENOO	0.279268
FBLIM1	0.279541
POLR2A	0.280318
TMEM33	0.281058
GGA2	0.281058
UBE2D3	0.281217
APEX1	0.281239
EIF3K	0.282169
GNAI2	0.283017
COPE	0.283017
CSF1R	0.283017
CAVIN1	0.283017
VPS28	0.283017
RTN3	0.283017
PHB2	0.283017
ADH5	0.283017
SYNCRIP	0.283017
NOTCH2	0.283017
EHD1	0.283017
APBB2	0.283017
CTSS	0.283112
ANXA7	0.283112
RRAS	0.283112
TFG	0.283112
MED15	0.283112
GBA	0.283112
XPO1	0.283112
ATP2B4	0.283112
SFXN1	0.283198
COX5B	0.28329
PSMB6	0.28329
MED16	0.283547
SSU72	0.28356
TRA2A	0.28356
AMFR	0.284733
TNIP1	0.284871
CERK	0.284871
EIF4G2	0.285054
MZT2A	0.285054
RPL19	0.285054
PRCP	0.285072
YPEL5	0.285103
FBN1	0.285103
TOMM40	0.285103
PPA1	0.285752
CALM3	0.285752
P3H2	0.285752
TMUB2	0.285752
ALDH4A1	0.285994
YME1L1	0.28606
TMEM167A	0.286397
BRD7	0.286397
ARMCX6	0.286397
HGS	0.287139
PHLDB2	0.28738
RNPEPL1	0.288189
ASXL1	0.288189
KHDRBS1	0.288298
LINC02532	0.288298
GABARAPL1	0.288532
TMEM123	0.289764
NDRG2	0.289824
COL6A2	0.289835
TPM3	0.290142
RAB18	0.290142
PIGQ	0.290142
ARPC5	0.290344
HERPUD1	0.290344
TGFBR1	0.290344
GAA	0.290866
STMN1	0.291518
CLIC4	0.291573
MT1E	0.291585
PPP1R14B	0.291585
H3F3B	0.291585
BEX4	0.291585
SLC16A3	0.291585
VDAC1	0.291754
CTNNA1	0.291754
FBXL5	0.291754
MYDGF	0.291754
CS	0.291754
HLA-E	0.291754
EFNA1	0.291754
RAI14	0.291754
CMTM4	0.291754
HLA-B	0.291754
LBH	0.29202
PIM3	0.29202
ARFGAP2	0.29202
CLN5	0.29202
OSMR	0.29202
NCOR1	0.29202
TBC1D10B	0.29202
MT2A	0.292281
SNX10	0.292281
VAT1	0.292705
TCEAL4	0.292744
CYTH1	0.292744
DNM2	0.292797
PSMA7	0.292797
NDUFB6	0.292797
MANF	0.292797
IMMT	0.292797
UPK3BL1	0.292797
NQO2	0.292797
ERAP1	0.292797
PTPRA	0.292797
RPL35A	0.292797
NGRN	0.292918
ATPAF1	0.292918
APOL6	0.292918
TACC1	0.295145
PTGER3	0.295145
FAM234A	0.295145
PPP1R7	0.295145
HP1BP3	0.295237
GRINA	0.295237
ALDH9A1	0.295324
RAB5A	0.295406
ACIN1	0.295631
RPL7	0.295713
LMNA	0.295988
PKP4	0.296333
DAP	0.296646
ANAPC16	0.296692
USF2	0.296692
POLD4	0.297204
SORT1	0.297204
STAT3	0.297204
SEPTIN8	0.29743
FAM160B2	0.297871
FCGR2A	0.297963
CNOT1	0.297963
UBE2D2	0.297963
EMC4	0.297963
STT3B	0.297995
PPIB	0.298104
SULF2	0.298104
AIFM1	0.298104
DANCR	0.298104
RBM4	0.298104
VPS35	0.298104
BLVRB	0.298104
DERL2	0.298104
EIF3B	0.298104
RDX	0.298104
STIP1	0.298104
CYP4A11	0.298104
SCAMP1	0.298104
AHCY	0.298198
SLC16A12	0.298198
ITGB8	0.298272
RNF11	0.298607
EIF3L	0.298607
SLC40A1	0.298691
NEDD4L	0.298691
PFN2	0.299892
BCL7C	0.299892
TCEAL8	0.299892
ARFGAP1	0.299892
ZFAS1	0.301021
PITPNA	0.301021
SPTAN1	0.301043
DCTN1	0.301043
QPRT	0.301043
TPT1	0.301043
SNRPD3	0.30168
B4GALT1	0.301957
COPA	0.301957
PHYH	0.301957
SPI1	0.302531
RPS13	0.302557
UQCRH	0.303524
PRDX4	0.303524
TTC3	0.303655
CCL19	0.30409
SUN2	0.30417
ATP5MF	0.304248
ENSA	0.304248
2022-03-06	0.304374
EIF4A1	0.304976
GNB2	0.305455
OXA1L	0.305455
NDUFB11	0.305455
MXD4	0.305455
TUBB	0.305455
PDLIM1	0.305455
SRSF7	0.305455
M6PR	0.305455
FLII	0.305455
PPP1R9B	0.305455
UBE2M	0.305455
REX1BD	0.305455
ENC1	0.305455
MRPL3	0.305455
GMFG	0.305518
CLCN7	0.305518
CASC4	0.305518
ARF1	0.306306
SUCLG2	0.307412
SELENOM	0.30815
RANGAP1	0.30815
CHMP4B	0.308401
CTDSP1	0.308451
ID1	0.308451
NAA10	0.308451
SYNE1	0.308451
PCCA	0.308451
2022-03-02	0.308451
MRPL4	0.308451
WASHC1	0.308758
TM4SF1	0.308758
RPS20	0.308758
PPM1G	0.308758
RPL6	0.308758
MEF2D	0.308849
ATP5MC1	0.309591
NELFE	0.309962
CSNK2A1	0.309962
SLC39A14	0.310418
RAB1A	0.31167
DNAJA1	0.311947
ATP6AP1	0.312205
TMEM165	0.312205
RPS4Y1	0.312493
AOPEP	0.312493
CDC42SE2	0.313245
UPP1	0.313245
ADAR	0.313752
UBE2J1	0.313761
TXN	0.313844
PNKD	0.313844
NCSTN	0.313844
FAT1	0.313844
PDGFRA	0.313844
UBE2E3	0.313844
ATP6V1E1	0.315264
KLHL36	0.315617
FBP1	0.316502
SDHC	0.316681
GPAT4	0.316681
MAVS	0.316681
ATP6V1D	0.316681
RNASEK	0.316701
SSBP4	0.31686
RPS12	0.316968
ATP6AP2	0.317087
ERO1A	0.317442
GPX4	0.31761
ATP6V0D1	0.31761
CLPP	0.31761
TAX1BP3	0.318033
F13A1	0.318033
SAT2	0.318033
RAB31	0.318033
SFXN2	0.318033
CDC37	0.319362
PROS1	0.31948
SUMO2	0.319754
INPPL1	0.319997
BCL2L1	0.319997
CD164	0.320573
PSMA3	0.32082
BZW1	0.32125
MBNL1	0.32125
ANAPC5	0.32125
TMEM127	0.32125
FGFR3	0.32125
SRSF6	0.321984
NUDT4	0.321984
SMG1	0.321984
KDELR1	0.322404
SMARCA2	0.322404
SET	0.322427
CKLF	0.322438
MTPN	0.323437
PHLDB1	0.323557
PRPF6	0.323557
MIEN1	0.324043
ITGA1	0.324452
DPYSL2	0.324452
NDUFA11	0.324452
ACADS	0.324452
SEC23A	0.324452
DDX39B	0.324683
KRTCAP2	0.324753
TBCA	0.324753
HOGA1	0.324753
PTPN1	0.324823
NUDT16	0.325313
YAP1	0.325901
ARHGEF12	0.326143
CMPK1	0.326143
UGP2	0.326143
CAPZA2	0.326143
IMPA2	0.326143
SLC25A1	0.326143
PRMT1	0.326143
TRABD	0.326143
SLC25A10	0.326143
LARP1	0.326434
FBXO7	0.326434
GGH	0.326434
RER1	0.327709
INAFM1	0.327933
CAPNS1	0.328257
PA2G4	0.328257
F11R	0.328507
ILVBL	0.328558
SEPTIN7	0.328665
INTS11	0.328716
RCN2	0.329088
SPON2	0.329088
PLSCR1	0.329088
CSKMT	0.329088
EIF4A3	0.329088
BNIP3	0.329088
GPC1	0.329716
ARPC1A	0.329829
HNRNPDL	0.330091
SNRPN	0.330091
N4BP2L2	0.330091
NDUFS8	0.330234
RING1	0.330688
IER2	0.330688
CTDSP2	0.330892
HIPK3	0.330892
TMED4	0.332349
TRIM44	0.332397
TAP1	0.332411
ERBB3	0.332411
RETREG3	0.332411
CRHBP	0.332478
KLF2	0.333891
PGRMC2	0.333964
PSMD4	0.333964
TOB1	0.333964
MPRIP	0.33407
SRI	0.33407
FZD4	0.33407
MRPL43	0.33407
TXNL1	0.33407
COL4A4	0.33407
RIN2	0.33407
ROBO4	0.33407
PDXK	0.334152
ACSS1	0.334152
TFPI2	0.334152
UGT2A3	0.334153
TRIB1	0.334186
RBIS	0.334506
DDX1	0.334506
PBXIP1	0.334506
EDNRB	0.334606
YWHAZ	0.335245
CBX3	0.335245
PTP4A3	0.335283
NECAP2	0.335283
NFIC	0.335966
INMT	0.336579
ZNF503	0.336579
METTL26	0.336579
ANKRD9	0.336579
LASP1	0.336592
DMXL2	0.337093
GPD1	0.33717
NUDCD3	0.338953
RPSA	0.340344
DHX30	0.340344
MGP	0.340344
SCD5	0.341127
TUBGCP2	0.341445
KLF13	0.341495
MBD2	0.341495
PPP2CA	0.341727
GLUD1	0.342293
RNASET2	0.342334
DHX9	0.342334
SRRM2	0.342472
TFPI	0.342472
PFKP	0.342472
AOX1	0.342472
RBFOX2	0.342472
CORO1B	0.342472
YPEL3	0.342507
MDM2	0.34265
GSTM3	0.342658
HSPA5	0.342658
SDF2L1	0.342658
STK24	0.342798
ANKRD13A	0.342798
WDR83OS	0.343482
MTCH2	0.343482
FSTL3	0.343482
ATP6V1F	0.344126
PRNP	0.344265
IGHG4	0.344997
CAMK2N1	0.345079
PSMA6	0.345079
CPT1A	0.345079
TUBA1B	0.345079
IRAK1	0.345079
SULF1	0.345619
DCAF8	0.34584
DNAJB2	0.34584
UFM1	0.346045
HSBP1L1	0.347014
SREBF2	0.347094
SMTN	0.347415
TSG101	0.347794
PDE4DIP	0.347817
PTPA	0.347973
S100A11	0.349714
CHI3L1	0.349714
RASSF7	0.349782
MEST	0.349782
BIRC2	0.349782
CREBBP	0.350009
COPZ1	0.350214
SYNPO	0.350214
EMC3	0.350214
MRC1	0.351148
ATF4	0.351266
FARP1	0.351412
PARM1	0.351412
UGDH	0.351412
UBE2B	0.351412
EFR3A	0.351412
PSMB9	0.352686
TIAL1	0.352686
SEC22B	0.353069
PARVA	0.353341
UBC	0.353341
EIF3M	0.353368
TMCO1	0.353382
ARRDC1	0.353382
C11orf58	0.353578
TXNL4A	0.353861
FABP1	0.353861
RPL9	0.353861
ACADSB	0.355482
SPCS2	0.355831
LRRFIP1	0.356382
NBL1	0.356382
ADH1B	0.356482
DNAJC8	0.356482
RHOQ	0.356482
DLST	0.356482
DSP	0.357322
FAAP20	0.35749
VASP	0.35749
PPP1CC	0.357634
PLOD1	0.357788
EIF3D	0.357962
GNAS	0.35835
BAD	0.359282
PAX2	0.359419
C19orf53	0.359509
PRR13	0.359835
GSTK1	0.3599
HSF1	0.3599
MARCKSL1	0.360407
PSMF1	0.360786
CD2AP	0.360786
CLINT1	0.360999
CAT	0.361553
BGN	0.362175
ATP2C1	0.362569
TMBIM1	0.362617
CCT8	0.362617
DDB1	0.362617
MFSD10	0.362617
LAPTM4A	0.362721
TMX4	0.3628
INO80E	0.362958
SRSF3	0.362979
CTNNB1	0.362979
COX17	0.363417
DNAJC5	0.363417
PDAP1	0.364049
DYNLT1	0.364145
ACTR3	0.364249
LSM7	0.364249
GPR108	0.364249
SERPINB1	0.364249
CDC42SE1	0.364249
SEC13	0.364249
TBC1D9B	0.364249
USP9X	0.364249
METRNL	0.364249
PTGR1	0.364249
TNFRSF1B	0.364249
SLC34A2	0.364249
PRELP	0.364677
COTL1	0.364718
PRRC2A	0.364718
CRTAP	0.364983
YWHAG	0.364983
SNX6	0.365207
MRPL52	0.365207
LPP	0.365207
TIMM13	0.366304
FUCA2	0.366616
DSG2	0.366616
NR2F6	0.367094
CSRP1	0.368211
WDR82	0.368249
GNG5	0.369408
NCL	0.369408
MYO1C	0.369408
GSDMD	0.369408
WIPI2	0.369408
HYOU1	0.369408
CEBPB	0.370089
PPP2CB	0.370089
ACSL1	0.370089
SLC8A1	0.370089
PTPN6	0.370089
TMEM94	0.370089
FKBP11	0.370089
ARF4	0.370704
PCOLCE2	0.370704
CNN3	0.371559
EIF3H	0.371829
DPYS	0.371829
SAFB2	0.372329
BCKDHA	0.372452
CTBP1	0.372461
DUSP3	0.372461
HACD3	0.372461
ITPRID2	0.372461
TRAPPC2L	0.372461
PHLDA1	0.372461
DGUOK	0.372461
G3BP1	0.372612
HM13	0.373416
CD163	0.373715
SIRPA	0.373715
CNPY2	0.373715
GLMP	0.373715
PACS2	0.373715
ATXN10	0.373715
LAMC3	0.373715
CUTA	0.374651
VAMP5	0.374651
PLEKHB2	0.374651
F2R	0.374651
ST14	0.374651
SERPING1	0.374651
UPF1	0.374651
SLC16A4	0.374651
CEACAM1	0.374651
WDR46	0.374651
RPS28	0.374651
ST5	0.375168
SCNN1A	0.375317
[truncated: 9,161 more rows]

## Sheet: Supplementary Table 7
Supplementary Table 7: GO enrichment analysis on Acute Kidney Injury (AKI) study using 10X Visium
ID	Description	GeneRatio	BgRatio	pvalue	p.adjust	qvalue	geneID	Count
GO:0006959	humoral immune response	29/232	317/18800	3.57585e-17	1.11888e-13	9.40637e-14	IGKC/IGHA1/IGHG1/IGLC3/IGLC2/IGLC1/IGHA2/IGHG3/JCHAIN/DEFB1/IGHM/LTF/C7/IGHG2/CLU/RPL30/C1QA/SLPI/LYZ/C1QB/CCL2/C3/CFB/CXCL14/HLA-DQB1/ROMO1/C1QC/CFI/TRBC2	29
GO:0006958	complement activation, classical pathway	18/232	108/18800	1.1826e-15	1.85018e-12	1.55543e-12	IGKC/IGHA1/IGHG1/IGLC3/IGLC2/IGLC1/IGHA2/IGHG3/IGHM/C7/IGHG2/CLU/C1QA/C1QB/C3/C1QC/CFI/TRBC2	18
GO:0006956	complement activation	19/232	131/18800	2.69215e-15	2.80791e-12	2.36059e-12	IGKC/IGHA1/IGHG1/IGLC3/IGLC2/IGLC1/IGHA2/IGHG3/IGHM/C7/IGHG2/CLU/C1QA/C1QB/C3/CFB/C1QC/CFI/TRBC2	19
GO:0002455	humoral immune response mediated by circulating immunoglobulin	18/232	121/18800	9.41258e-15	7.36299e-12	6.19001e-12	IGKC/IGHA1/IGHG1/IGLC3/IGLC2/IGLC1/IGHA2/IGHG3/IGHM/C7/IGHG2/CLU/C1QA/C1QB/C3/C1QC/CFI/TRBC2	18
GO:0016064	immunoglobulin mediated immune response	21/232	216/18800	3.02605e-13	1.8937e-10	1.59202e-10	IGKC/IGHA1/IGHG1/IGLC3/IGLC2/IGLC1/IGHA2/IGHG3/IGHM/C7/IGHG2/CLU/HLA-DPA1/C1QA/C1QB/C3/HLA-DQB1/C1QC/CFI/TRBC2/FCGR3A	21
GO:0019724	B cell mediated immunity	21/232	219/18800	3.96942e-13	2.07005e-10	1.74028e-10	IGKC/IGHA1/IGHG1/IGLC3/IGLC2/IGLC1/IGHA2/IGHG3/IGHM/C7/IGHG2/CLU/HLA-DPA1/C1QA/C1QB/C3/HLA-DQB1/C1QC/CFI/TRBC2/FCGR3A	21
GO:0002181	cytoplasmic translation	16/232	146/18800	3.61577e-11	1.61625e-08	1.35877e-08	RPL37/RPL37A/RPL34/RPS29/RPS26/RPL31/RPS25/RPL36A/RPS21/RPL38/RPL23/RPL30/RPL23A/RPL27/RPL24/RPS10	16
GO:0042742	defense response to bacterium	23/232	364/18800	1.60275e-10	5.88289e-08	4.9457e-08	IGKC/IGHA1/IGHG1/IGLC3/IGLC2/IGLC1/IGHA2/IGHG3/JCHAIN/DEFB1/IGHM/LTF/IGHG2/RPL30/SLPI/AQP1/LCN2/LYZ/GRN/RNF213/ROMO1/STAB1/TRBC2	23
GO:0002449	lymphocyte mediated immunity	23/232	365/18800	1.69211e-10	5.88289e-08	4.9457e-08	IGKC/IGHA1/IGHG1/IGLC3/IGLC2/IGLC1/IGHA2/IGHG3/IGHM/C7/IGHG2/CLU/HLA-DPA1/C1QA/C1QB/C3/HLA-DQB1/CTSH/C1QC/CFI/CTSC/TRBC2/FCGR3A	23
GO:0002460	adaptive immune response based on somatic recombination of immune receptors built from immunoglobulin superfamily domains	23/232	370/18800	2.21336e-10	6.92559e-08	5.82229e-08	IGKC/IGHA1/IGHG1/IGLC3/IGLC2/IGLC1/IGHA2/IGHG3/IGHM/C7/IGHG2/CLU/HLA-DPA1/C1QA/C1QB/C3/HLA-DQB1/CTSH/C1QC/CFI/CTSC/TRBC2/FCGR3A	23
GO:0002253	activation of immune response	23/232	386/18800	5.07516e-10	1.33906e-07	1.12573e-07	IGKC/IGHA1/IGHG1/IGLC3/IGLC2/IGLC1/IGHA2/IGHG3/IGHM/C7/IGHG2/CLU/C1QA/THY1/C1QB/PLCG2/C3/CFB/HLA-DQB1/C1QC/LAPTM5/CFI/TRBC2	23
GO:0002443	leukocyte mediated immunity	25/232	457/18800	5.1354e-10	1.33906e-07	1.12573e-07	IGKC/IGHA1/IGHG1/IGLC3/IGLC2/IGLC1/IGHA2/IGHG3/IGHM/PTGDS/C7/IGHG2/CLU/HLA-DPA1/C1QA/C1QB/PLCG2/C3/HLA-DQB1/CTSH/C1QC/CFI/CTSC/TRBC2/FCGR3A	25
GO:0006911	phagocytosis, engulfment	14/232	128/18800	6.42957e-10	1.54755e-07	1.30101e-07	IGKC/IGHA1/IGHG1/IGLC3/IGLC2/IGLC1/IGHA2/IGHG3/IGHM/IGHG2/PLCG2/C3/GSN/TRBC2	14
GO:0001894	tissue homeostasis	19/232	272/18800	1.28573e-09	2.8736e-07	2.41582e-07	IGKC/IGHA1/SPP1/IGHA2/IGHG3/JCHAIN/COL3A1/PIGR/LTF/CCN2/PTH1R/LYZ/ALB/ITGB6/CTSH/SERPINA3/TPP1/CUBN/NOX4	19
GO:0099024	plasma membrane invagination	14/232	137/18800	1.58694e-09	3.31035e-07	2.78299e-07	IGKC/IGHA1/IGHG1/IGLC3/IGLC2/IGLC1/IGHA2/IGHG3/IGHM/IGHG2/PLCG2/C3/GSN/TRBC2	14
GO:0010324	membrane invagination	14/232	144/18800	3.05807e-09	5.98044e-07	5.02771e-07	IGKC/IGHA1/IGHG1/IGLC3/IGLC2/IGLC1/IGHA2/IGHG3/IGHM/IGHG2/PLCG2/C3/GSN/TRBC2	14
GO:0060249	anatomical structure homeostasis	19/232	319/18800	1.75427e-08	3.2289e-06	2.71451e-06	IGKC/IGHA1/SPP1/IGHA2/IGHG3/JCHAIN/COL3A1/PIGR/LTF/CCN2/PTH1R/LYZ/ALB/ITGB6/CTSH/SERPINA3/TPP1/CUBN/NOX4	19
GO:0050867	positive regulation of cell activation	22/232	436/18800	2.55487e-08	4.44122e-06	3.7337e-06	IGKC/IGHA1/IGHG1/IGLC3/IGLC2/IGLC1/IGHA2/IGHG3/IGHM/IGHG2/ACTA2/CCN2/HLA-DPA1/THY1/TGFBR2/CCL2/IGFBP2/HLA-DQB1/JUND/CTSC/TRBC2/FCGR3A	22
GO:0007584	response to nutrient	13/232	150/18800	4.52719e-08	7.45557e-06	6.26784e-06	SPP1/SOD2/COL1A1/POSTN/TGFBR2/IGFBP2/ASS1/STAT1/SRSF2/SFRP1/SLC34A1/KL/SLC6A19	13
GO:0006910	phagocytosis, recognition	11/232	102/18800	5.30054e-08	8.2927e-06	6.97161e-06	IGKC/IGHA1/IGHG1/IGLC3/IGLC2/IGLC1/IGHA2/IGHG3/IGHM/IGHG2/TRBC2	11
GO:0050853	B cell receptor signaling pathway	12/232	131/18800	8.17079e-08	1.21745e-05	1.0235e-05	IGKC/IGHA1/IGHG1/IGLC3/IGLC2/IGLC1/IGHA2/IGHG3/IGHM/IGHG2/PLCG2/TRBC2	12
GO:0007568	aging	13/232	163/18800	1.20999e-07	1.72094e-05	1.44678e-05	SOD2/IGFBP5/CCN2/C1QA/CRYAB/TGFBR2/MME/IGFBP2/ASS1/JUND/CTSC/KL/SERPINF1	13
GO:0050864	regulation of B cell activation	14/232	200/18800	1.9925e-07	2.71066e-05	2.27883e-05	IGKC/IGHA1/IGHG1/IGLC3/IGLC2/IGLC1/IGHA2/IGHG3/IGHM/IGHG2/LAPTM5/SFRP1/TRBC2/MZB1	14
GO:0001822	kidney development	17/232	303/18800	2.38416e-07	3.10835e-05	2.61317e-05	PODXL/ACTA2/NPHS2/LRP2/AQP2/MME/ASS1/NPNT/ENPEP/CTSH/TACSTD2/PAX8/SDC1/STAT1/SFRP1/SLC34A1/SERPINF1	17
GO:0002696	positive regulation of leukocyte activation	20/232	421/18800	2.98163e-07	3.73181e-05	3.1373e-05	IGKC/IGHA1/IGHG1/IGLC3/IGLC2/IGLC1/IGHA2/IGHG3/IGHM/IGHG2/HLA-DPA1/THY1/TGFBR2/CCL2/IGFBP2/HLA-DQB1/JUND/CTSC/TRBC2/FCGR3A	20
GO:0019730	antimicrobial humoral response	11/232	122/18800	3.36381e-07	4.04822e-05	3.40331e-05	IGHA1/IGHA2/JCHAIN/DEFB1/IGHM/LTF/RPL30/SLPI/LYZ/CXCL14/ROMO1	11
GO:0072001	renal system development	17/232	312/18800	3.60302e-07	4.17549e-05	3.51031e-05	PODXL/ACTA2/NPHS2/LRP2/AQP2/MME/ASS1/NPNT/ENPEP/CTSH/TACSTD2/PAX8/SDC1/STAT1/SFRP1/SLC34A1/SERPINF1	17
GO:0050851	antigen receptor-mediated signaling pathway	15/232	244/18800	3.90843e-07	4.36767e-05	3.67187e-05	IGKC/IGHA1/IGHG1/IGLC3/IGLC2/IGLC1/IGHA2/IGHG3/IGHM/IGHG2/THY1/PLCG2/HLA-DQB1/LAPTM5/TRBC2	15
GO:0001655	urogenital system development	18/232	352/18800	4.11689e-07	4.44198e-05	3.73434e-05	PODXL/ACTA2/NPHS2/LRP2/AQP2/MME/ASS1/NPNT/ENPEP/CTSH/TACSTD2/PAX8/SDC1/STAT1/SFRP1/CRIP1/SLC34A1/SERPINF1	18
GO:0001895	retina homeostasis	9/232	80/18800	6.15928e-07	6.42413e-05	5.40072e-05	IGKC/IGHA1/IGHA2/IGHG3/JCHAIN/PIGR/LTF/LYZ/ALB	9
GO:0002768	immune response-regulating cell surface receptor signaling pathway	17/232	328/18800	7.23958e-07	7.3073e-05	6.14319e-05	IGKC/IGHA1/IGHG1/IGLC3/IGLC2/IGLC1/IGHA2/IGHG3/IGHM/PIGR/IGHG2/THY1/PLCG2/HLA-DQB1/LAPTM5/TRBC2/FCGR3A	17
GO:0071280	cellular response to copper ion	6/232	27/18800	7.88865e-07	7.71362e-05	6.48478e-05	MT1G/AQP1/AQP2/MT1F/MT1H/AOC1	6
GO:0051251	positive regulation of lymphocyte activation	18/232	371/18800	8.82188e-07	8.36474e-05	7.03218e-05	IGKC/IGHA1/IGHG1/IGLC3/IGLC2/IGLC1/IGHA2/IGHG3/IGHM/IGHG2/HLA-DPA1/THY1/TGFBR2/CCL2/IGFBP2/HLA-DQB1/TRBC2/FCGR3A	18
GO:0006909	phagocytosis	16/232	310/18800	1.63522e-06	0.000150488	0.000126514	IGKC/IGHA1/IGHG1/IGLC3/IGLC2/IGLC1/IGHA2/IGHG3/IGHM/IGHG2/PLCG2/CCL2/C3/GSN/TGM2/TRBC2	16
GO:0098656	anion transmembrane transport	14/232	247/18800	2.51182e-06	0.000224557	0.000188783	SLC12A3/LRP2/CLTRN/SLC3A1/SLC13A3/SLC12A1/SLC5A12/SLC25A5/SLC7A8/SLC34A1/SLC4A4/SLC13A1/SLC22A6/SLC22A8	14
GO:0050871	positive regulation of B cell activation	11/232	152/18800	3.00132e-06	0.000260865	0.000219307	IGKC/IGHA1/IGHG1/IGLC3/IGLC2/IGLC1/IGHA2/IGHG3/IGHM/IGHG2/TRBC2	11
GO:0010043	response to zinc ion	7/232	53/18800	3.78659e-06	0.000320222	0.000269209	SOD2/MT1G/ASS1/MT1F/MT1H/CRIP1/KHK	7
GO:0042113	B cell activation	16/232	336/18800	4.60946e-06	0.000379552	0.000319087	IGKC/IGHA1/IGHG1/IGLC3/IGLC2/IGLC1/IGHA2/IGHG3/IGHM/IGHG2/PLCG2/SLC25A5/LAPTM5/SFRP1/TRBC2/MZB1	16
GO:0002429	immune response-activating cell surface receptor signaling pathway	15/232	300/18800	5.12192e-06	0.000400662	0.000336833	IGKC/IGHA1/IGHG1/IGLC3/IGLC2/IGLC1/IGHA2/IGHG3/IGHM/IGHG2/THY1/PLCG2/HLA-DQB1/LAPTM5/TRBC2	15
GO:0002757	immune response-activating signal transduction	15/232	300/18800	5.12192e-06	0.000400662	0.000336833	IGKC/IGHA1/IGHG1/IGLC3/IGLC2/IGLC1/IGHA2/IGHG3/IGHM/IGHG2/THY1/PLCG2/HLA-DQB1/LAPTM5/TRBC2	15
GO:0098883	synapse pruning	4/232	11/18800	6.96742e-06	0.000531733	0.000447024	C1QA/C1QB/C3/C1QC	4
GO:0010038	response to metal ion	16/232	351/18800	7.99861e-06	0.000595896	0.000500966	SOD2/MT1G/AQP1/AQP2/PLCG2/IGFBP2/ASS1/JUND/SDC1/MT1F/MT1H/CRIP1/SLC34A1/SERPINF1/KHK/AOC1	16
GO:0033273	response to vitamin	8/232	83/18800	8.48216e-06	0.000617225	0.000518896	SPP1/SOD2/COL1A1/POSTN/SRSF2/SFRP1/SLC34A1/KL	8
GO:0019731	antibacterial humoral response	7/232	60/18800	8.81723e-06	0.000627025	0.000527135	IGHA1/IGHA2/JCHAIN/DEFB1/IGHM/LTF/SLPI	7
GO:0002764	immune response-regulating signaling pathway	19/232	482/18800	9.11267e-06	0.000633634	0.000532691	IGKC/IGHA1/IGHG1/IGLC3/IGLC2/IGLC1/IGHA2/IGHG3/IGHM/PIGR/LTF/IGHG2/THY1/PLCG2/HLA-DQB1/CTSH/LAPTM5/TRBC2/FCGR3A	19
GO:0046688	response to copper ion	6/232	41/18800	1.03723e-05	0.00070554	0.000593142	MT1G/AQP1/AQP2/MT1F/MT1H/AOC1	6
GO:1901652	response to peptide	19/232	491/18800	1.18186e-05	0.000786818	0.000661472	COL3A1/IGFBP5/COL1A1/VIM/CCN2/SPINK1/RPL23/ASS1/JUND/CA2/STAT1/SLC22A12/SLC34A1/KL/HADH/SERPINF1/STAT2/KHK/MZB1	19
GO:0009636	response to toxic substance	13/232	247/18800	1.2805e-05	0.000834729	0.00070175	GPX3/SOD2/APOE/MT1G/ALB/ASS1/MGST3/SDC1/SLC7A8/MT1F/MT1H/SLC47A2/SLC22A8	13
GO:0006575	cellular modified amino acid metabolic process	11/232	188/18800	2.26838e-05	0.00144852	0.00121776	SOD2/NAT8/GATM/ASS1/PAX8/CKB/BBOX1/CLIC5/BHMT/BHMT2/SHMT1	11
GO:0009991	response to extracellular stimulus	18/232	479/18800	2.97155e-05	0.0018596	0.00156335	SPP1/SOD2/APOE/COL1A1/SPINK1/POSTN/AQP2/TGFBR2/ALB/IGFBP2/ASS1/STAT1/SRSF2/SFRP1/SLC34A1/KL/SLC6A19/AOC1	18
GO:0002274	myeloid leukocyte activation	12/232	232/18800	3.28159e-05	0.00201335	0.00169261	PTGDS/FN1/MT1G/CLU/C1QA/PLCG2/GRN/TGFBR2/ITGB6/JUND/CTSC/SBNO2	12
GO:0031667	response to nutrient levels	17/232	446/18800	4.15992e-05	0.00250315	0.00210438	SPP1/SOD2/APOE/COL1A1/SPINK1/POSTN/TGFBR2/ALB/IGFBP2/ASS1/STAT1/SRSF2/SFRP1/SLC34A1/KL/SLC6A19/AOC1	17
GO:0043434	response to peptide hormone	16/232	404/18800	4.46284e-05	0.00263476	0.00221502	COL3A1/IGFBP5/COL1A1/CCN2/SPINK1/ASS1/JUND/CA2/STAT1/SLC22A12/SLC34A1/KL/HADH/STAT2/KHK/MZB1	16
GO:1990000	amyloid fibril formation	5/232	34/18800	5.69549e-05	0.00330022	0.00277447	APOE/CLU/NAT8/CRYAB/GSN	5
GO:0060263	regulation of respiratory burst	4/232	18/18800	6.03592e-05	0.00343389	0.00288685	IGHA1/IGHA2/JCHAIN/GRN	4
GO:0002526	acute inflammatory response	8/232	113/18800	8.01695e-05	0.00447947	0.00376586	IGHG1/FN1/C3/ASS1/SERPINA3/KL/SAA1/FCGR3A	8
GO:0003014	renal system process	8/232	114/18800	8.53162e-05	0.00468341	0.00393731	IGHA1/IGHA2/JCHAIN/AQP1/AQP2/GSN/SLC22A12/SLC22A6	8
GO:0050829	defense response to Gram-negative bacterium	7/232	87/18800	0.000100641	0.00542938	0.00456444	DEFB1/IGHM/LTF/RPL30/AQP1/LYZ/ROMO1	7
GO:0098754	detoxification	9/232	150/18800	0.000104494	0.00554172	0.00465888	GPX3/SOD2/APOE/MT1G/ALB/MGST3/MT1F/MT1H/SLC47A2	9
GO:0097242	amyloid-beta clearance	5/232	39/18800	0.000112082	0.00584506	0.0049139	APOE/CLU/LRP2/C3/MME	5
GO:0150146	cell junction disassembly	4/232	21/18800	0.000114671	0.00588204	0.00494498	C1QA/C1QB/C3/C1QC	4
GO:0008037	cell recognition	11/232	228/18800	0.000129882	0.00655483	0.0055106	IGKC/IGHA1/IGHG1/IGLC3/IGLC2/IGLC1/IGHA2/IGHG3/IGHM/IGHG2/TRBC2	11
GO:0071248	cellular response to metal ion	10/232	191/18800	0.000135071	0.00670854	0.00563981	MT1G/AQP1/AQP2/PLCG2/JUND/MT1F/MT1H/SLC34A1/SERPINF1/AOC1	10
GO:0006091	generation of precursor metabolites and energy	17/232	494/18800	0.000144495	0.00706445	0.00593903	SOD2/ALDOB/COX6C/NDUFA1/SUCLG1/COX7A2/GHITM/ATP5PO/NDUFV1/IDH2/CYB5A/ATP5F1C/SLC4A4/KL/AK4/KHK/NOX4	17
GO:0052547	regulation of peptidase activity	16/232	456/18800	0.000182099	0.00876598	0.00736949	LTF/FN1/CCN2/SPINK1/SLPI/AQP1/TIMP3/CRYAB/GRN/C3/CTSH/SERPINA3/GSN/HSPE1/LAPTM5/SERPINF1	16
GO:2000425	regulation of apoptotic cell clearance	3/232	10/18800	0.000208808	0.00989942	0.00832237	CCL2/C3/TGM2	3
GO:0042476	odontogenesis	8/232	130/18800	0.000212753	0.00993589	0.00835303	COL1A2/COL1A1/HTRA1/AQP1/ITGB6/SDC1/SLC34A1/FAM20A	8

## Sheet: Supplementary Table 8
Supplementary Table 8: Reactome analysis on Acute Kidney Injury (AKI) study using 10X Visium
	ID	Description	GeneRatio	BgRatio	pvalue	p.adjust	qvalue	geneID	Count
R-HSA-156842	R-HSA-156842	Eukaryotic Translation Elongation	17/176	93/10891	9.53742e-14	2.66571e-11	2.23878e-11	RPL37/RPL37A/RPL34/RPS29/RPS26/RPL31/RPS25/RPL36A/RPS21/RPL38/RPL23/RPL30/RPL23A/RPL27/RPL24/RPS10/EEF1B2	17
R-HSA-72764	R-HSA-72764	Eukaryotic Translation Termination	17/176	93/10891	9.53742e-14	2.66571e-11	2.23878e-11	RPL37/RPL37A/RPL34/RPS29/RPS26/RPL31/RPS25/RPL36A/RPS21/RPL38/RPL23/RPL30/RPL23A/RPL27/RPL24/RPS10/TRMT112	17
R-HSA-156902	R-HSA-156902	Peptide chain elongation	16/176	89/10891	6.89927e-13	9.64174e-11	8.09757e-11	RPL37/RPL37A/RPL34/RPS29/RPS26/RPL31/RPS25/RPL36A/RPS21/RPL38/RPL23/RPL30/RPL23A/RPL27/RPL24/RPS10	16
R-HSA-192823	R-HSA-192823	Viral mRNA Translation	16/176	89/10891	6.89927e-13	9.64174e-11	8.09757e-11	RPL37/RPL37A/RPL34/RPS29/RPS26/RPL31/RPS25/RPL36A/RPS21/RPL38/RPL23/RPL30/RPL23A/RPL27/RPL24/RPS10	16
R-HSA-2408557	R-HSA-2408557	Selenocysteine synthesis	16/176	93/10891	1.40758e-12	1.57368e-10	1.32165e-10	RPL37/RPL37A/RPL34/RPS29/RPS26/RPL31/RPS25/RPL36A/RPS21/RPL38/RPL23/RPL30/RPL23A/RPL27/RPL24/RPS10	16
R-HSA-975956	R-HSA-975956	Nonsense Mediated Decay (NMD) independent of the Exon Junction Complex (EJC)	16/176	95/10891	1.98362e-12	1.84808e-10	1.5521e-10	RPL37/RPL37A/RPL34/RPS29/RPS26/RPL31/RPS25/RPL36A/RPS21/RPL38/RPL23/RPL30/RPL23A/RPL27/RPL24/RPS10	16
R-HSA-72689	R-HSA-72689	Formation of a pool of free 40S subunits	16/176	101/10891	5.28544e-12	3.6932e-10	3.10172e-10	RPL37/RPL37A/RPL34/RPS29/RPS26/RPL31/RPS25/RPL36A/RPS21/RPL38/RPL23/RPL30/RPL23A/RPL27/RPL24/RPS10	16
R-HSA-9633012	R-HSA-9633012	Response of EIF2AK4 (GCN2) to amino acid deficiency	16/176	101/10891	5.28544e-12	3.6932e-10	3.10172e-10	RPL37/RPL37A/RPL34/RPS29/RPS26/RPL31/RPS25/RPL36A/RPS21/RPL38/RPL23/RPL30/RPL23A/RPL27/RPL24/RPS10	16
R-HSA-156827	R-HSA-156827	L13a-mediated translational silencing of Ceruloplasmin expression	16/176	111/10891	2.34399e-11	1.37039e-09	1.15092e-09	RPL37/RPL37A/RPL34/RPS29/RPS26/RPL31/RPS25/RPL36A/RPS21/RPL38/RPL23/RPL30/RPL23A/RPL27/RPL24/RPS10	16
R-HSA-1799339	R-HSA-1799339	SRP-dependent cotranslational protein targeting to membrane	16/176	112/10891	2.69666e-11	1.37039e-09	1.15092e-09	RPL37/RPL37A/RPL34/RPS29/RPS26/RPL31/RPS25/RPL36A/RPS21/RPL38/RPL23/RPL30/RPL23A/RPL27/RPL24/RPS10	16
R-HSA-72706	R-HSA-72706	GTP hydrolysis and joining of the 60S ribosomal subunit	16/176	112/10891	2.69666e-11	1.37039e-09	1.15092e-09	RPL37/RPL37A/RPL34/RPS29/RPS26/RPL31/RPS25/RPL36A/RPS21/RPL38/RPL23/RPL30/RPL23A/RPL27/RPL24/RPS10	16
R-HSA-927802	R-HSA-927802	Nonsense-Mediated Decay (NMD)	16/176	115/10891	4.07049e-11	1.75031e-09	1.46999e-09	RPL37/RPL37A/RPL34/RPS29/RPS26/RPL31/RPS25/RPL36A/RPS21/RPL38/RPL23/RPL30/RPL23A/RPL27/RPL24/RPS10	16
R-HSA-975957	R-HSA-975957	Nonsense Mediated Decay (NMD) enhanced by the Exon Junction Complex (EJC)	16/176	115/10891	4.07049e-11	1.75031e-09	1.46999e-09	RPL37/RPL37A/RPL34/RPS29/RPS26/RPL31/RPS25/RPL36A/RPS21/RPL38/RPL23/RPL30/RPL23A/RPL27/RPL24/RPS10	16
R-HSA-2408522	R-HSA-2408522	Selenoamino acid metabolism	16/176	118/10891	6.06767e-11	2.41516e-09	2.02836e-09	RPL37/RPL37A/RPL34/RPS29/RPS26/RPL31/RPS25/RPL36A/RPS21/RPL38/RPL23/RPL30/RPL23A/RPL27/RPL24/RPS10	16
R-HSA-72613	R-HSA-72613	Eukaryotic Translation Initiation	16/176	119/10891	6.91281e-11	2.41516e-09	2.02836e-09	RPL37/RPL37A/RPL34/RPS29/RPS26/RPL31/RPS25/RPL36A/RPS21/RPL38/RPL23/RPL30/RPL23A/RPL27/RPL24/RPS10	16
R-HSA-72737	R-HSA-72737	Cap-dependent Translation Initiation	16/176	119/10891	6.91281e-11	2.41516e-09	2.02836e-09	RPL37/RPL37A/RPL34/RPS29/RPS26/RPL31/RPS25/RPL36A/RPS21/RPL38/RPL23/RPL30/RPL23A/RPL27/RPL24/RPS10	16
R-HSA-168273	R-HSA-168273	Influenza Viral RNA Transcription and Replication	16/176	135/10891	4.7377e-10	1.5561e-08	1.30689e-08	RPL37/RPL37A/RPL34/RPS29/RPS26/RPL31/RPS25/RPL36A/RPS21/RPL38/RPL23/RPL30/RPL23A/RPL27/RPL24/RPS10	16
R-HSA-9711097	R-HSA-9711097	Cellular response to starvation	17/176	156/10891	5.01071e-10	1.5561e-08	1.30689e-08	RPL37/RPL37A/RPL34/RPS29/RPS26/RPL31/RPS25/RPL36A/RPS21/RPL38/RPL23/RPL30/RPL23A/RPL27/RPL24/RPS10/ATP6V0B	17
R-HSA-71291	R-HSA-71291	Metabolism of amino acids and derivatives	25/176	374/10891	1.43914e-09	4.23411e-08	3.556e-08	RPL37/RPL37A/RPL34/RPS29/RPS26/RPL31/RPS25/RPL36A/RPS21/RPL38/RPL23/RPL30/RPL23A/RPL27/RPL24/GATM/RPS10/ASS1/CKB/ECHS1/BBOX1/BHMT/BHMT2/PRODH2/SHMT1	25
R-HSA-9010553	R-HSA-9010553	Regulation of expression of SLITs and ROBOs	17/176	171/10891	2.10014e-09	5.8699e-08	4.92981e-08	RPL37/RPL37A/RPL34/RPS29/RPS26/RPL31/RPS25/RPL36A/RPS21/RPL38/RPL23/RPL30/RPL23A/RPL27/RPL24/RPS10/RBX1	17
R-HSA-168255	R-HSA-168255	Influenza Infection	16/176	156/10891	4.0599e-09	1.08071e-07	9.07627e-08	RPL37/RPL37A/RPL34/RPS29/RPS26/RPL31/RPS25/RPL36A/RPS21/RPL38/RPL23/RPL30/RPL23A/RPL27/RPL24/RPS10	16
R-HSA-8868773	R-HSA-8868773	rRNA processing in the nucleus and cytosol	17/176	194/10891	1.43808e-08	3.65402e-07	3.06881e-07	RPL37/RPL37A/RPL34/RPS29/RPS26/RPL31/RPS25/RPL36A/RPS21/RPL38/RPL23/RPL30/RPL23A/RPL27/RPL24/RPS10/TRMT112	17
R-HSA-72312	R-HSA-72312	rRNA processing	17/176	204/10891	3.04698e-08	7.40548e-07	6.21946e-07	RPL37/RPL37A/RPL34/RPS29/RPS26/RPL31/RPS25/RPL36A/RPS21/RPL38/RPL23/RPL30/RPL23A/RPL27/RPL24/RPS10/TRMT112	17
R-HSA-6791226	R-HSA-6791226	Major pathway of rRNA processing in the nucleolus and cytosol	16/176	184/10891	4.35917e-08	1.01532e-06	8.52715e-07	RPL37/RPL37A/RPL34/RPS29/RPS26/RPL31/RPS25/RPL36A/RPS21/RPL38/RPL23/RPL30/RPL23A/RPL27/RPL24/RPS10	16
R-HSA-376176	R-HSA-376176	Signaling by ROBO receptors	17/176	218/10891	8.09824e-08	1.81077e-06	1.52076e-06	RPL37/RPL37A/RPL34/RPS29/RPS26/RPL31/RPS25/RPL36A/RPS21/RPL38/RPL23/RPL30/RPL23A/RPL27/RPL24/RPS10/RBX1	17
R-HSA-2173782	R-HSA-2173782	Binding and Uptake of Ligands by Scavenger Receptors	8/176	42/10891	2.9301e-07	6.29972e-06	5.29079e-06	JCHAIN/COL3A1/APOE/COL1A2/COL1A1/ALB/STAB1/SAA1	8
R-HSA-977606	R-HSA-977606	Regulation of Complement cascade	8/176	47/10891	7.28714e-07	1.50871e-05	1.26708e-05	C7/CLU/C1QA/C1QB/C3/CFB/C1QC/CFI	8
R-HSA-72766	R-HSA-72766	Translation	18/176	291/10891	1.05899e-06	2.1142e-05	1.7756e-05	RPL37/RPL37A/RPL34/RPS29/RPS26/RPL31/RPS25/RPL36A/RPS21/RPL38/RPL23/RPL30/RPL23A/RPL27/RPL24/RPS10/EEF1B2/TRMT112	18
R-HSA-425407	R-HSA-425407	SLC-mediated transmembrane transport	16/176	250/10891	2.79246e-06	5.3827e-05	4.52064e-05	SLC12A3/SLC3A1/SLC13A3/SLC12A1/SLC5A2/SLC5A12/SLC25A5/SLC7A8/SLC22A12/SLC34A1/SLC47A2/SLC4A4/SLC13A1/SLC6A19/SLC22A6/SLC22A8	16
R-HSA-166658	R-HSA-166658	Complement cascade	8/176	58/10891	3.81823e-06	7.11464e-05	5.9752e-05	C7/CLU/C1QA/C1QB/C3/CFB/C1QC/CFI	8
R-HSA-166663	R-HSA-166663	Initial triggering of complement	5/176	23/10891	2.76676e-05	0.000498909	0.000419006	C1QA/C1QB/C3/CFB/C1QC	5
R-HSA-3000170	R-HSA-3000170	Syndecan interactions	5/176	27/10891	6.29917e-05	0.00110039	0.000924155	COL3A1/COL1A2/FN1/COL1A1/SDC1	5
R-HSA-5619102	R-HSA-5619102	SLC transporter disorders	8/176	98/10891	0.000181132	0.00306827	0.00257688	SLC12A3/SLC3A1/SLC12A1/SLC5A2/SLC22A12/SLC34A1/SLC4A4/SLC6A19	8
R-HSA-381426	R-HSA-381426	Regulation of Insulin-like Growth Factor (IGF) transport and uptake by Insulin-like Growth Factor Binding Proteins (IGFBPs)	9/176	125/10891	0.000187856	0.00308857	0.00259393	SPP1/APOE/IGFBP5/FN1/ALB/C3/IGFBP2/PRSS23/FAM20A	9
R-HSA-3000480	R-HSA-3000480	Scavenging by Class A Receptors	4/176	19/10891	0.000211305	0.00337484	0.00283434	COL3A1/APOE/COL1A2/COL1A1	4
R-HSA-425393	R-HSA-425393	Transport of inorganic cations/anions and amino acids/oligopeptides	8/176	108/10891	0.000353432	0.00519917	0.0043665	SLC12A3/SLC3A1/SLC12A1/SLC5A12/SLC7A8/SLC34A1/SLC4A4/SLC6A19	8
R-HSA-6785807	R-HSA-6785807	Interleukin-4 and Interleukin-13 signaling	8/176	108/10891	0.000353432	0.00519917	0.0043665	COL1A2/FN1/VIM/MUC1/LCN2/CCL2/STAT1/SAA1	8
R-HSA-8957275	R-HSA-8957275	Post-translational protein phosphorylation	8/176	108/10891	0.000353432	0.00519917	0.0043665	SPP1/APOE/IGFBP5/FN1/ALB/C3/PRSS23/FAM20A	8
R-HSA-425366	R-HSA-425366	Transport of bile salts and organic acids; metal ions and amine compounds	7/176	85/10891	0.000436716	0.0062596	0.00525709	SLC13A3/SLC22A12/SLC47A2/SLC13A1/SLC6A19/SLC22A6/SLC22A8	7
R-HSA-8964058	R-HSA-8964058	HDL remodeling	3/176	10/10891	0.000457966	0.00640007	0.00537507	APOE/ALB/PLTP	3
R-HSA-1428517	R-HSA-1428517	The citric acid (TCA) cycle and respiratory electron transport	10/176	178/10891	0.000618109	0.00828169	0.00695534	COX6C/COX7B/NDUFA1/SUCLG1/ATP5MC3/COX6B1/ATP5PO/NDUFV1/IDH2/ATP5F1C	10
R-HSA-5661231	R-HSA-5661231	Metallothioneins bind metals	3/176	11/10891	0.000622238	0.00828169	0.00695534	MT1G/MT1F/MT1H	3
R-HSA-6798695	R-HSA-6798695	Neutrophil degranulation	18/176	482/10891	0.000791775	0.0102931	0.00864459	PIGR/LTF/SLPI/OLFM4/LCN2/LYZ/GRN/CTSA/C3/MME/ANPEP/CTSH/SERPINA3/GSN/PGRMC1/METTL7A/CTSC/AOC1	18
R-HSA-163200	R-HSA-163200	Respiratory electron transport; ATP synthesis by chemiosmotic coupling; and heat production by uncoupling proteins.	8/176	127/10891	0.00103853	0.0131941	0.011081	COX6C/COX7B/NDUFA1/ATP5MC3/COX6B1/ATP5PO/NDUFV1/ATP5F1C	8
R-HSA-9754678	R-HSA-9754678	SARS-CoV-2 modulates host translation machinery	5/176	50/10891	0.00122493	0.0152164	0.0127794	RPS29/RPS26/RPS25/RPS21/RPS10	5
R-HSA-8874081	R-HSA-8874081	MET activates PTK2 signaling	4/176	30/10891	0.00130068	0.0152933	0.012844	COL3A1/COL1A2/FN1/COL1A1	4
R-HSA-166786	R-HSA-166786	Creation of C4 and C2 activators	3/176	14/10891	0.00132452	0.0152933	0.012844	C1QA/C1QB/C1QC	3
R-HSA-5660526	R-HSA-5660526	Response to metal ions	3/176	14/10891	0.00132452	0.0152933	0.012844	MT1G/MT1F/MT1H	3
R-HSA-72695	R-HSA-72695	Formation of the ternary complex; and subsequently; and subsequently the 43S complex	5/176	51/10891	0.00134056	0.0152933	0.012844	RPS29/RPS26/RPS25/RPS21/RPS10	5
R-HSA-549132	R-HSA-549132	Organic cation/anion/zwitterion transport	3/176	15/10891	0.00163608	0.0182914	0.015362	SLC22A12/SLC22A6/SLC22A8	3
R-HSA-114604	R-HSA-114604	GPVI-mediated activation cascade	4/176	35/10891	0.00233396	0.0251876	0.0211537	COL1A2/COL1A1/PLCG2/RHOB	4
R-HSA-72649	R-HSA-72649	Translation initiation complex formation	5/176	58/10891	0.00238809	0.0251876	0.0211537	RPS29/RPS26/RPS25/RPS21/RPS10	5
R-HSA-72702	R-HSA-72702	Ribosomal scanning and start codon recognition	5/176	58/10891	0.00238809	0.0251876	0.0211537	RPS29/RPS26/RPS25/RPS21/RPS10	5
R-HSA-216083	R-HSA-216083	Integrin cell surface interactions	6/176	85/10891	0.00249105	0.0257105	0.0215929	SPP1/COL3A1/COL1A2/FN1/COL1A1/ITGB6	6
R-HSA-3000171	R-HSA-3000171	Non-integrin membrane-ECM interactions	5/176	59/10891	0.00257565	0.0257105	0.0215929	COL3A1/COL1A2/FN1/COL1A1/SDC1	5
R-HSA-72662	R-HSA-72662	Activation of the mRNA upon binding of the cap-binding complex and eIFs; and subsequent binding to 43S	5/176	59/10891	0.00257565	0.0257105	0.0215929	RPS29/RPS26/RPS25/RPS21/RPS10	5
R-HSA-163210	R-HSA-163210	Formation of ATP by chemiosmotic coupling	3/176	18/10891	0.0028315	0.0272898	0.0229192	ATP5MC3/ATP5PO/ATP5F1C	3
R-HSA-2022377	R-HSA-2022377	Metabolism of Angiotensinogen to Angiotensins	3/176	18/10891	0.0028315	0.0272898	0.0229192	MME/ANPEP/ENPEP	3
R-HSA-8875878	R-HSA-8875878	MET promotes cell motility	4/176	41/10891	0.00418767	0.0396764	0.033322	COL3A1/COL1A2/FN1/COL1A1	4

## Sheet: Supplementary Table 9
Supplementary Table 9: Disease Ontology analysis on Acute Kidney Injury (AKI) study using 10X visium
	ID	Description	GeneRatio	BgRatio	pvalue	p.adjust	qvalue	geneID	Count
DOID:18	DOID:18	urinary system disease	35/162	478/8007	1.43e-11	8.3e-09	5.68e-09	6696/7369/6648/1281/348/5730/2335/1191/1490/7827/4036/10631/4582/359/5745/3934/6347/213/6519/718/4311/6557/3119/3727/6524/760/6772/116085/3875/6569/8671/9365/8029/340024/9356	35
DOID:557	DOID:557	kidney disease	34/162	461/8007	2.43e-11	8.3e-09	5.68e-09	6696/7369/6648/1281/348/5730/2335/1191/1490/7827/4036/10631/359/5745/3934/6347/213/6519/718/4311/6557/3119/3727/6524/760/6772/116085/3875/6569/8671/9365/8029/340024/9356	34
DOID:263	DOID:263	kidney cancer	30/162	437/8007	2.48e-09	5.65e-07	3.86e-07	6696/7369/4316/6648/5420/348/3488/4057/4495/1191/1490/7827/4582/1014/358/5745/7048/6347/4311/3485/445/3119/7849/6772/3875/6422/8671/341/3795/23600	30
DOID:3996	DOID:3996	urinary system cancer	32/162	500/8007	3.82e-09	6.51e-07	4.45e-07	6696/7369/4316/6648/5420/348/3488/4057/4495/1191/7431/1490/7827/10631/4582/1014/358/5745/7048/6347/4311/3485/445/3119/7849/6772/3875/6422/8671/341/3795/23600	32
DOID:4450	DOID:4450	renal cell carcinoma	25/162	342/8007	1.84e-08	2.5e-06	1.71e-06	6696/4316/6648/348/3488/4057/4495/1191/4582/1014/358/7048/6347/4311/3485/445/3119/7849/6772/3875/6422/8671/341/3795/23600	25
DOID:4451	DOID:4451	renal carcinoma	26/162	380/8007	3.59e-08	4.09e-06	2.79e-06	6696/4316/6648/348/3488/4057/4495/1191/4582/1014/358/5745/7048/6347/4311/3485/445/3119/7849/6772/3875/6422/8671/341/3795/23600	26
DOID:10871	DOID:10871	age related macular degeneration	11/162	72/8007	1.72e-07	1.47e-05	1.01e-05	2878/4316/6648/348/5654/7078/6347/718/629/3426/5176	11
DOID:2007	DOID:2007	degeneration of macula and posterior pole	11/162	72/8007	1.72e-07	1.47e-05	1.01e-05	2878/4316/6648/348/5654/7078/6347/718/629/3426/5176	11
DOID:4448	DOID:4448	macular degeneration	11/162	74/8007	2.3e-07	1.75e-05	1.19e-05	2878/4316/6648/348/5654/7078/6347/718/629/3426/5176	11
DOID:299	DOID:299	adenocarcinoma	15/162	158/8007	6.14e-07	4.19e-05	2.86e-05	2878/4316/6648/5420/4582/358/7070/5745/7048/6273/3856/3880/3875/6275/6470	15
DOID:26	DOID:26	pancreas disease	15/162	171/8007	1.69e-06	0.00010476	7.16e-05	6696/1672/6648/348/4057/6690/359/3934/6347/3119/3856/3336/760/6772/3033	15
DOID:1074	DOID:1074	kidney failure	14/162	156/8007	2.91e-06	0.00016526	0.000113	6696/348/5730/2335/7827/5745/3934/6347/718/6557/116085/9365/340024/9356	14
DOID:3480	DOID:3480	uveal disease	8/162	46/8007	3.21e-06	0.00016817	0.00011498	6648/348/1191/3934/6347/3119/1152/5176	8
DOID:2921	DOID:2921	glomerulonephritis	10/162	79/8007	3.77e-06	0.00018386	0.00012571	6648/1281/348/1191/7827/3934/6347/4311/6557/3727	10
DOID:4606	DOID:4606	bile duct cancer	13/162	140/8007	4.57e-06	0.00019485	0.00013323	6696/4316/5420/348/7431/10631/4582/358/3934/4311/6382/3880/1890	13
DOID:4897	DOID:4897	bile duct carcinoma	13/162	140/8007	4.57e-06	0.00019485	0.00013323	6696/4316/5420/348/7431/10631/4582/358/3934/4311/6382/3880/1890	13
DOID:688	DOID:688	embryonal cancer	22/162	373/8007	5.42e-06	0.00021748	0.0001487	4316/6648/5420/348/10158/6590/10631/4582/5745/3934/6273/3485/445/3856/388/3336/6382/3880/4494/3875/6422/6470	22
DOID:2994	DOID:2994	germ cell cancer	23/162	410/8007	7.49e-06	0.00027222	0.00018613	4316/6648/5420/348/10158/6590/10631/4582/358/5745/3934/6273/3485/445/3856/388/3336/6382/3880/4494/3875/6422/6470	23
DOID:4766	DOID:4766	embryoma	21/162	352/8007	7.58e-06	0.00027222	0.00018613	4316/6648/348/10158/6590/10631/4582/5745/3934/6273/3485/445/3856/388/3336/6382/3880/4494/3875/6422/6470	21
DOID:120	DOID:120	female reproductive organ cancer	24/162	455/8007	1.32e-05	0.00043979	0.0003007	378938/4316/6648/1490/6590/10631/4582/7070/7078/3934/2896/4311/290/3485/3119/4070/7849/3336/6382/7052/3880/3429/6275/1890	24
DOID:4607	DOID:4607	biliary tract cancer	14/162	178/8007	1.35e-05	0.00043979	0.0003007	6696/4316/5420/348/7431/10631/4582/358/3934/4311/4070/6382/3880/1890	14
DOID:13141	DOID:13141	uveitis	6/162	28/8007	1.63e-05	0.00050194	0.0003432	6648/3934/6347/3119/1152/5176	6
DOID:3908	DOID:3908	non-small cell lung carcinoma	23/162	431/8007	1.69e-05	0.00050194	0.0003432	6696/4316/6648/348/5284/2335/1490/10631/4582/5745/7048/6273/290/2934/4070/3856/388/3880/3875/6422/6275/1890/6288	23
DOID:4556	DOID:4556	lung large cell carcinoma	4/162	2022-09-07	1.88e-05	0.00053422	0.00036527	7048/3856/3880/3875	4
DOID:4989	DOID:4989	pancreatitis	11/162	117/8007	2.26e-05	0.00061648	0.00042152	6696/1672/6648/4057/6690/3934/6347/3119/3856/3336/760	11
DOID:403	DOID:403	mouth disease	14/162	188/8007	2.51e-05	0.00065958	0.00045098	1672/1278/4057/1277/6690/6590/3934/4069/6347/3119/7052/1075/54757/2214	14
DOID:10155	DOID:10155	intestinal cancer	18/162	300/8007	3.31e-05	0.00083569	0.0005714	4316/6648/5420/348/7431/10631/4582/10562/7078/3934/7048/3694/4070/3336/6772/3875/1890/5176	18
DOID:10534	DOID:10534	stomach cancer	17/162	274/8007	3.63e-05	0.00088456	0.00060482	6696/4316/6648/1278/6876/6590/10631/4582/10562/5336/6347/6273/3485/3426/6382/3880/6422	17
DOID:10952	DOID:10952	nephritis	12/162	147/8007	3.96e-05	0.00093176	0.00063709	6696/6648/1281/348/1191/7827/3934/6347/4311/6557/3119/3727	12
DOID:4896	DOID:4896	bile duct adenocarcinoma	11/162	128/8007	5.23e-05	0.00115142	0.00078728	6696/4316/5420/7431/10631/4582/358/3934/4311/3880/1890	11
DOID:4947	DOID:4947	cholangiocarcinoma	11/162	128/8007	5.23e-05	0.00115142	0.00078728	6696/4316/5420/7431/10631/4582/358/3934/4311/3880/1890	11
DOID:9252	DOID:9252	amino acid metabolic disorder	5/162	22/8007	6.35e-05	0.00134568	0.00092011	348/6347/6519/445/635	5
DOID:9256	DOID:9256	colorectal cancer	17/162	287/8007	6.51e-05	0.00134568	0.00092011	4316/6648/5420/348/10631/4582/10562/7078/3934/7048/3694/4070/3336/6772/3875/1890/5176	17
DOID:5672	DOID:5672	large intestine cancer	17/162	288/8007	6.8e-05	0.00136395	0.00093259	4316/6648/5420/348/10631/4582/10562/7078/3934/7048/3694/4070/3336/6772/3875/1890/5176	17
DOID:8466	DOID:8466	retinal degeneration	16/162	261/8007	7.19e-05	0.00139534	0.00095406	2878/4316/6648/348/1191/5654/358/7078/6347/718/629/3119/2934/3426/6422/5176	16
DOID:4928	DOID:4928	intrahepatic cholangiocarcinoma	6/162	36/8007	7.37e-05	0.00139534	0.00095406	6696/7431/4582/358/4311/3880	6
DOID:4914	DOID:4914	esophagus adenocarcinoma	5/162	23/8007	7.98e-05	0.00147167	0.00100625	6648/4582/6273/6422/6275	5
DOID:5679	DOID:5679	retinal disease	19/162	358/8007	0.00010498	0.00188413	0.00128827	2878/4316/6648/348/1191/1490/5654/10631/358/7078/6347/718/4311/629/3119/2934/3426/6422/5176	19
DOID:5082	DOID:5082	liver cirrhosis	14/162	220/8007	0.00013966	0.00244222	0.00166986	4316/6648/348/2335/358/359/7048/3119/12/3856/3880/3875/1890/5176	14
DOID:10652	DOID:10652	Alzheimer's disease	21/162	430/8007	0.00014556	0.00248172	0.00169687	6648/348/5730/4057/1191/1490/5654/4036/358/1410/2896/7048/6347/718/4311/12/2934/5360/1152/341/5176	21
DOID:28	DOID:28	endocrine system disease	20/162	399/8007	0.00014943	0.00248572	0.0016996	6696/1672/6648/348/4057/1277/6690/4036/359/3934/6347/3119/7849/3856/3336/760/6772/3880/9365/3033	20
DOID:850	DOID:850	lung disease	23/162	499/8007	0.00016349	0.00262688	0.00179612	6696/1672/4316/6648/1281/348/3488/1277/1490/6590/4582/358/7078/6347/3694/3119/1512/6382/6772/3880/3875/3429/50507	23
DOID:680	DOID:680	tauopathy	21/162	434/8007	0.00016562	0.00262688	0.00179612	6648/348/5730/4057/1191/1490/5654/4036/358/1410/2896/7048/6347/718/4311/12/2934/5360/1152/341/5176	21
DOID:219	DOID:219	colon cancer	16/162	282/8007	0.00017791	0.00275766	0.00188555	4316/6648/5420/10631/4582/10562/7078/3934/7048/3694/4070/3336/6772/3875/1890/5176	16
DOID:2348	DOID:2348	arteriosclerotic cardiovascular disease	18/162	345/8007	0.00019957	0.00302453	0.00206801	6696/6648/348/5730/2335/59/4069/2896/6347/213/8490/5360/760/5184/9365/341/6288/2214	18
DOID:5241	DOID:5241	hemangioblastoma	4/162	16/8007	0.00024304	0.00360328	0.00246373	1191/358/4311/7849	4
DOID:1883	DOID:1883	hepatitis C	14/162	233/8007	0.00025459	0.0036942	0.0025259	6696/6648/348/7431/3934/6347/3119/3856/6382/6772/3875/341/6288/2214	14
DOID:10854	DOID:10854	salivary gland disease	3/162	2022-07-07	0.00026807	0.00380877	0.00260424	6690/6590/3934	3
DOID:11335	DOID:11335	sarcoidosis	8/162	84/8007	0.00027926	0.00388684	0.00265762	3514/3500/6696/1281/1277/6347/3119/6772	8
DOID:2349	DOID:2349	arteriosclerosis	18/162	356/8007	0.00029371	0.00400618	0.00273922	6696/6648/348/5730/2335/59/4069/2896/6347/213/8490/5360/760/5184/9365/341/6288/2214	18
DOID:10976	DOID:10976	membranous glomerulonephritis	4/162	17/8007	0.00031283	0.00413356	0.00282631	6648/1281/1191/4311	4
DOID:3969	DOID:3969	papillary thyroid carcinoma	9/162	108/8007	0.00032123	0.00413356	0.00282631	6696/2335/4495/10631/4582/6347/9547/7849/3880	9
DOID:552	DOID:552	pneumonia	9/162	108/8007	0.00032123	0.00413356	0.00282631	6696/4316/1281/348/3488/1277/6590/4582/6347	9
DOID:2916	DOID:2916	hypersensitivity reaction type IV disease	8/162	88/8007	0.00038455	0.00485677	0.0033208	3514/3500/6696/1281/1277/6347/3119/6772	8
DOID:8398	DOID:8398	osteoarthritis	12/162	187/8007	0.00039186	0.00485904	0.00332235	6696/6648/5730/1277/7431/5654/1410/3934/7048/388/5184/9365	12
DOID:1407	DOID:1407	anterior uveitis	3/162	2022-08-07	0.00042254	0.00505564	0.00345678	6648/3934/6347	3
DOID:9279	DOID:9279	hyperhomocysteinemia	3/162	2022-08-07	0.00042254	0.00505564	0.00345678	348/6347/635	3
DOID:1936	DOID:1936	atherosclerosis	17/162	344/8007	0.00056613	0.00665695	0.00455167	6696/6648/348/5730/2335/59/2896/6347/213/8490/5360/760/5184/9365/341/6288/2214	17
DOID:1520	DOID:1520	colon carcinoma	11/162	168/8007	0.00057903	0.0066932	0.00457646	4316/5420/4582/10562/7078/7048/3336/6772/3875/1890/5176	11
DOID:10873	DOID:10873	Kuhnt-Junius degeneration	3/162	2022-09-07	0.00062441	0.00698109	0.0047733	6648/5654/5176	3
DOID:12030	DOID:12030	panuveitis	3/162	2022-09-07	0.00062441	0.00698109	0.0047733	6648/3934/6347	3
DOID:4539	DOID:4539	labyrinthine disease	4/162	21/8007	0.00073855	0.00812401	0.00555477	1277/358/359/2214	4
DOID:3213	DOID:3213	demyelinating disease	11/162	175/8007	0.00081453	0.00880158	0.00601806	348/730/1410/2896/6347/718/3485/3119/1152/3429/2214	11
DOID:1564	DOID:1564	fungal infectious disease	7/162	76/8007	0.00082595	0.00880158	0.00601806	1672/6648/348/1191/6590/6772/2214	7
DOID:9849	DOID:9849	Meniere's disease	3/162	2022-10-07	0.00087879	0.00918172	0.00627798	358/359/2214	3
DOID:1800	DOID:1800	neuroendocrine carcinoma	4/162	22/8007	0.00088855	0.00918172	0.00627798	6696/3856/3880/3875	4
DOID:3910	DOID:3910	lung adenocarcinoma	11/162	178/8007	0.00093736	0.00954154	0.006524	6648/348/1490/4582/5745/7048/6273/4070/6275/1890/6288	11
DOID:5517	DOID:5517	stomach carcinoma	10/162	153/8007	0.00104296	0.0104603	0.00715222	6696/4316/6648/1278/6876/4582/10562/6347/6273/3485	10
DOID:12554	DOID:12554	hemolytic-uremic syndrome	4/162	23/8007	0.00105881	0.0104653	0.00715564	1191/718/629/3426	4
DOID:3426	DOID:3426	vestibular disease	3/162	2022-11-07	0.00119046	0.0111218	0.0076045	358/359/2214	3
DOID:4988	DOID:4988	alcoholic pancreatitis	3/162	2022-11-07	0.00119046	0.0111218	0.0076045	6648/6690/6347	3
DOID:9847	DOID:9847	peripheral vertigo	3/162	2022-11-07	0.00119046	0.0111218	0.0076045	358/359/2214	3
DOID:9848	DOID:9848	endolymphatic hydrops	3/162	2022-11-07	0.00119046	0.0111218	0.0076045	358/359/2214	3
DOID:1781	DOID:1781	thyroid cancer	12/162	213/8007	0.00124318	0.0113733	0.00777645	6696/6648/2335/4495/10631/4582/6347/9547/7849/388/3880/6275	12
DOID:4468	DOID:4468	clear cell adenocarcinoma	4/162	24/8007	0.00125073	0.0113733	0.00777645	2878/4582/5745/7048	4
DOID:12217	DOID:12217	Lewy body dementia	5/162	42/8007	0.00148062	0.0132866	0.0090847	6696/348/358/2896/4311	5
DOID:13580	DOID:13580	cholestasis	6/162	62/8007	0.00150759	0.013353	0.00913005	6696/4316/1490/3694/4311/3119	6
DOID:13359	DOID:13359	Ehlers-Danlos syndrome	3/162	2022-12-07	0.0015638	0.0136706	0.00934725	1281/1278/1277	3
DOID:2394	DOID:2394	ovarian cancer	15/162	312/8007	0.00158355	0.0136706	0.00934725	4316/1490/10631/7070/3934/2896/290/3485/3119/4070/7849/6382/7052/6275/1890	15
DOID:1091	DOID:1091	tooth disease	10/162	162/8007	0.00160868	0.013714	0.00937692	1672/1278/4057/1277/4069/6347/3119/1075/54757/2214	10
DOID:3978	DOID:3978	extrinsic cardiomyopathy	4/162	26/8007	0.0017052	0.0140946	0.00963717	6696/3934/6347/3119	4
DOID:820	DOID:820	myocarditis	4/162	26/8007	0.0017052	0.0140946	0.00963717	6696/3934/6347/3119	4
DOID:4138	DOID:4138	bile duct disease	7/162	86/8007	0.00171533	0.0140946	0.00963717	6696/4316/1490/3694/4311/3119/3875	7
DOID:9741	DOID:9741	biliary tract disease	7/162	87/8007	0.0018343	0.0148928	0.0101829	6696/4316/1490/3694/4311/3119/3875	7
DOID:2151	DOID:2151	malignant ovarian surface epithelial-stromal neoplasm	14/162	286/8007	0.00191565	0.0150108	0.0102636	4316/1490/10631/7070/2896/290/3485/3119/4070/7849/6382/7052/6275/1890	14
DOID:2152	DOID:2152	ovary epithelial cancer	14/162	286/8007	0.00191565	0.0150108	0.0102636	4316/1490/10631/7070/2896/290/3485/3119/4070/7849/6382/7052/6275/1890	14
DOID:4001	DOID:4001	ovarian carcinoma	14/162	286/8007	0.00191565	0.0150108	0.0102636	4316/1490/10631/7070/2896/290/3485/3119/4070/7849/6382/7052/6275/1890	14
DOID:1793	DOID:1793	pancreatic cancer	15/162	319/8007	0.0019693	0.0150108	0.0102636	4316/6648/10631/4582/5745/3934/718/4311/689/760/6382/7052/6275/1890/341	15
DOID:12571	DOID:12571	phacogenic glaucoma	3/162	13/8007	0.0020029	0.0150108	0.0102636	6648/348/1191	3
DOID:13608	DOID:13608	biliary atresia	3/162	13/8007	0.0020029	0.0150108	0.0102636	6696/4316/1490	3
DOID:13641	DOID:13641	exfoliation syndrome	3/162	13/8007	0.0020029	0.0150108	0.0102636	6648/348/1191	3
DOID:2377	DOID:2377	multiple sclerosis	10/162	169/8007	0.00220286	0.0163299	0.0111655	348/730/1410/2896/6347/718/3119/1152/3429/2214	10
DOID:3963	DOID:3963	thyroid carcinoma	11/162	200/8007	0.00239023	0.0175284	0.011985	6696/2335/4495/10631/4582/6347/9547/7849/388/3880/6275	11
DOID:576	DOID:576	proteinuria	6/162	68/8007	0.00243019	0.0176318	0.0120557	1490/7827/6347/718/6772/8029	6
DOID:345	DOID:345	uterine disease	5/162	48/8007	0.00270396	0.0194116	0.0132726	378938/6648/358/6347/635	5
DOID:655	DOID:655	inherited metabolic disorder	15/162	331/8007	0.00281247	0.0199802	0.0136614	7369/6648/348/2335/229/6347/213/6519/718/445/5184/6427/3875/635/341	15
DOID:1380	DOID:1380	endometrial cancer	7/162	97/8007	0.00340907	0.0239689	0.0163887	378938/4316/4582/4311/3336/6382/6275	7
DOID:0060049	DOID:0060049	autoimmune disease of urogenital tract	6/162	73/8007	0.00347963	0.0239708	0.01639	2335/7048/3119/3856/3880/3875	6
DOID:12236	DOID:12236	primary biliary cirrhosis	6/162	73/8007	0.00347963	0.0239708	0.01639	2335/7048/3119/3856/3880/3875	6
DOID:363	DOID:363	uterine cancer	7/162	98/8007	0.00361024	0.0246218	0.0168351	378938/4316/4582/4311/3336/6382/6275	7
DOID:2797	DOID:2797	idiopathic interstitial pneumonia	4/162	32/8007	0.00373319	0.0249119	0.0170334	4316/3488/4582/6347	4
DOID:184	DOID:184	bone cancer	12/162	243/8007	0.0037336	0.0249119	0.0170334	6696/6648/2335/1277/59/1490/4582/2197/5745/445/6275/5176	12
DOID:12679	DOID:12679	nephrocalcinosis	2/162	2022-05-07	0.00390846	0.0249119	0.0170334	6557/6569	2
DOID:13476	DOID:13476	supraglottis cancer	2/162	2022-05-07	0.00390846	0.0249119	0.0170334	7058/3880	2
DOID:3116	DOID:3116	kidney benign neoplasm	2/162	2022-05-07	0.00390846	0.0249119	0.0170334	7849/23600	2
DOID:731	DOID:731	urinary system benign neoplasm	2/162	2022-05-07	0.00390846	0.0249119	0.0170334	7849/23600	2
DOID:7763	DOID:7763	carcinoma of supraglottis	2/162	2022-05-07	0.00390846	0.0249119	0.0170334	7058/3880	2
DOID:240	DOID:240	iris disease	3/162	17/8007	0.00448753	0.0281269	0.0192317	6648/348/1191	3
DOID:3393	DOID:3393	coronary artery disease	15/162	348/8007	0.00450037	0.0281269	0.0192317	6696/6648/348/2335/10631/7078/3934/6347/213/718/2934/7058/5360/3875/341	15
DOID:2154	DOID:2154	nephroblastoma	6/162	77/8007	0.0045366	0.0281269	0.0192317	7369/5420/1490/7827/7849/6772	6
DOID:9455	DOID:9455	lipid storage disease	8/162	130/8007	0.0047571	0.0292283	0.0199848	7369/6648/348/213/5184/3875/635/341	8
DOID:15	DOID:15	reproductive system disease	16/162	386/8007	0.00492248	0.0299744	0.0204949	2878/378938/4316/6648/5730/4057/4582/358/6347/5476/718/3485/3119/10857/3426/635	16
DOID:1116	DOID:1116	pertussis	4/162	35/8007	0.00518661	0.0310287	0.0212158	7369/6347/6772/6288	4
DOID:13207	DOID:13207	proliferative diabetic retinopathy	4/162	35/8007	0.00518661	0.0310287	0.0212158	1490/10631/6347/4311	4
DOID:2730	DOID:2730	epidermolysis bullosa	3/162	18/8007	0.00530585	0.0311948	0.0213293	1277/7431/3875	3
DOID:4248	DOID:4248	coronary stenosis	3/162	18/8007	0.00530585	0.0311948	0.0213293	6696/348/6347	3
DOID:229	DOID:229	female reproductive system disease	10/162	193/8007	0.00569258	0.0323388	0.0221116	378938/4316/6648/4057/358/6347/5476/10857/3426/635	10
DOID:0070004	DOID:0070004	myeloma	14/162	323/8007	0.0057279	0.0323388	0.0221116	3538/6696/6648/3507/2335/1277/4582/3934/7048/6382/3418/6422/51655/341	14
DOID:12347	DOID:12347	osteogenesis imperfecta	2/162	2022-06-07	0.00578495	0.0323388	0.0221116	1278/1277	2
DOID:2942	DOID:2942	bronchiolitis	2/162	2022-06-07	0.00578495	0.0323388	0.0221116	6347/3429	2
DOID:5870	DOID:5870	eosinophilic pneumonia	2/162	2022-06-07	0.00578495	0.0323388	0.0221116	6696/4582	2
DOID:7941	DOID:7941	Barrett's adenocarcinoma	2/162	2022-06-07	0.00578495	0.0323388	0.0221116	6273/6275	2
DOID:2462	DOID:2462	retinal vascular disease	5/162	58/8007	0.0061561	0.0330778	0.0226169	6648/1490/10631/6347/4311	5
DOID:8947	DOID:8947	diabetic retinopathy	5/162	58/8007	0.0061561	0.0330778	0.0226169	6648/1490/10631/6347/4311	5
DOID:2871	DOID:2871	endometrial carcinoma	6/162	82/8007	0.00616991	0.0330778	0.0226169	4316/4582/4311/3336/6382/6275	6
DOID:2237	DOID:2237	hepatitis	17/162	431/8007	0.00618282	0.0330778	0.0226169	6696/6648/348/1191/7431/3113/358/3934/6347/3119/3856/6382/6772/3875/341/6288/2214	17
DOID:214	DOID:214	teeth hard tissue disease	3/162	19/8007	0.00620815	0.0330778	0.0226169	4057/4069/54757	3
DOID:2731	DOID:2731	vesiculobullous skin disease	3/162	19/8007	0.00620815	0.0330778	0.0226169	1277/7431/3875	3
DOID:255	DOID:255	hemangioma	4/162	37/8007	0.00634106	0.033524	0.022922	1191/358/4311/7849	4
DOID:0060031	DOID:0060031	autoimmune disease of gastrointestinal tract	7/162	109/8007	0.00646768	0.0339305	0.0231999	1490/3119/3856/7052/6772/3875/2214	7
DOID:4960	DOID:4960	bone marrow cancer	14/162	328/8007	0.00653835	0.0340394	0.0232743	3538/6696/6648/3507/2335/1277/4582/3934/7048/6382/3418/6422/51655/341	14
DOID:3627	DOID:3627	aortic aneurysm	5/162	60/8007	0.00710489	0.0366271	0.0250437	3514/348/2335/59/7048	5
DOID:447	DOID:447	renal tubular transport disease	3/162	20/8007	0.00719652	0.0366271	0.0250437	6557/6524/8671	3
DOID:9120	DOID:9120	amyloidosis	3/162	20/8007	0.00719652	0.0366271	0.0250437	4069/4311/6288	3
DOID:3082	DOID:3082	interstitial lung disease	9/162	170/8007	0.00748242	0.0378001	0.0258457	4316/6648/3488/4582/7078/6347/3119/6382/50507	9
DOID:14250	DOID:14250	Down syndrome	5/162	61/8007	0.00761564	0.0379114	0.0259218	348/6347/3856/760/3772	5
DOID:520	DOID:520	aortic disease	5/162	61/8007	0.00761564	0.0379114	0.0259218	3514/348/2335/59/7048	5
DOID:14004	DOID:14004	thoracic aortic aneurysm	2/162	2022-07-07	0.0079917	0.0394952	0.0270048	2335/59	2
DOID:8857	DOID:8857	lupus erythematosus	6/162	87/8007	0.00819503	0.0402087	0.0274926	3500/6648/348/3501/3934/6347	6
DOID:326	DOID:326	ischemia	10/162	204/8007	0.00831198	0.0404912	0.0276858	6648/348/1277/1191/6347/213/718/12/3336/1890	10
DOID:0050339	DOID:0050339	commensal bacterial infectious disease	4/162	40/8007	0.00837358	0.040502	0.0276931	7369/6347/6772/6288	4
DOID:104	DOID:104	bacterial infectious disease	12/162	271/8007	0.00875638	0.0420553	0.0287552	1672/7369/348/7431/4582/3934/6347/718/3119/5184/6772/6288	12

[truncated: 12 more sheets: Supplementary Table 10, Supplementary Table 11, Supplementary Table 12, Supplementary Table 13, Supplementary Table 14, Supplementary Table 15, Supplementary Table16, Supplementary Table 17, Supplementary Table 18, Supplementary Table 19, Supplementary Table 20, Supplementary Table 21]
